# Supplementary material for: Rationale, design and baseline data of a mixed methods study examining the clinical impact of a brief transition programme for young people with juvenile idiopathic arthritis: the DON'T RETARD project
Source: PubMed Central journal article supplement — BMJ Open. 2013 Dec 2;3(12):e003591. doi: 10.1136/bmjopen-2013-003591 (PMC3856617; doi:10.1136/bmjopen-2013-003591), 2013-12-02
Supplement: bmjopen-2013-003591.draft_revisions.pdf [file bmjopen-2013-003591.draft_revisions.pdf]

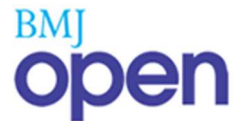

**Rationale, design and baseline data of a mixed-methods study examining the clinical impact of a brief transition programme for young people with juvenile idiopathic arthritis: The DON'T RETARD project**

|                                 |                                                                                                                                                                                                                                                      |
|---------------------------------|------------------------------------------------------------------------------------------------------------------------------------------------------------------------------------------------------------------------------------------------------|
| Journal:                        | <i>BMJ Open</i>                                                                                                                                                                                                                                      |
| Manuscript ID:                  | bmjopen-2013-003591                                                                                                                                                                                                                                  |
| Article Type:                   | Research                                                                                                                                                                                                                                             |
| Date Submitted by the Author:   | 15-Jul-2013                                                                                                                                                                                                                                          |
| Complete List of Authors:       | Hilderson, Deborah; Katholieke Universiteit Leuven, Centre for Health Services and Nursing Research, Department of Public Health and Primary Care<br>Westhovens, Rene<br>Wouters, Carine<br>Van der Elst, Kristien<br>Goossens, Eva<br>Moons, Philip |
| <b>Primary Subject Heading</b>: | Paediatrics                                                                                                                                                                                                                                          |
| Secondary Subject Heading:      | Rheumatology, Research methods                                                                                                                                                                                                                       |
| Keywords:                       | RHEUMATOLOGY, Paediatric rheumatology < PAEDIATRICALS, PAEDIATRICALS, QUALITATIVE RESEARCH                                                                                                                                                           |
|                                 |                                                                                                                                                                                                                                                      |

SCHOLARONE™  
Manuscripts

only

1  
2  
3 **Rationale, design and baseline data of a mixed-methods study examining the clinical impact of a brief**  
4 **transition programme for young people with juvenile idiopathic arthritis: The DON'T RETARD project**  
5  
6  
7

8 Deborah Hilderson, PhD, RN<sup>1,2</sup>; Rene Westhovens, MD, PhD<sup>3</sup>; Carine Wouters, MD, PhD<sup>4</sup>; Kristien Van der Elst,  
9 MSc, RN<sup>2,3</sup>; Eva Goossens, MSc, RN<sup>2</sup>; Philip Moons, PhD, RN<sup>2\*</sup>  
10  
11

12  
13  
14 <sup>1</sup>Department of Paediatrics, University Hospitals Leuven, Belgium

15  
16 <sup>2</sup> Centre for Health Services and Nursing Research, Department of Public Health and Primary Care, KU Leuven,  
17 Belgium  
18

19  
20 <sup>3</sup>Skeletal Biology and Engineering Research Center, Department of Development and Regeneration KU Leuven;  
21 Rheumatology, University Hospitals Leuven, Belgium  
22

23  
24 <sup>4</sup>Department of Paediatric Rheumatology, University Hospitals Leuven, Belgium  
25

26  
27  
28 \*Corresponding author: Philip Moons, Centre for Health Services and Nursing Research, Department of Public  
29 Health and Primary Care, KU Leuven, Kapucijnenvoer 35, box 7001, B-3000 Leuven, Belgium; Tel: +32-16-  
30 336984; Fax: +32-16-336970  
31  
32  
33

34  
35  
36 **Keywords:** brief intervention, complex intervention, mixed methods, adolescents, juvenile idiopathic arthritis,  
37 transition, transfer, study protocol, effect sizes, clinical relevance  
38  
39

40  
41  
42 **Word count:** 4770  
43  
44  
45  
46  
47  
48  
49  
50  
51  
52  
53  
54  
55  
56  
57  
58  
59  
60

**ABSTRACT**

**Objectives:**To describe (1) the content of a transition programme for youngsters with juvenile idiopathic arthritis (JIA) designed as a brief intervention, (2) the rationale and design of the evaluation of this transition programme using mixed-methods, and (3) to provide baseline data. We hypothesised that the transition programme improves the physical, psychosocial, and rheumatic-specific health of adolescents with JIA.

**Design:**An 'embedded experimental design'. Using a 'one-group pretest-posttest, with a non-equivalent posttest-only comparison group design', we quantitatively evaluated the impact of the transition programme, applying both longitudinal and comparative analyses. Subsequently, experiences of adolescents and their parents who participated in the experimental group were analysed qualitatively, using content analysis.

**Setting:**Subjects participating the intervention, were recruited at a tertiary centre in Belgium. The comparison group subjects were recruited from one tertiary and three secondary care centres in Belgium.

**Participants:**The intervention group consisted of 33 adolescents (25 females; 8 males), with a median age of 15.99 years. Main diagnoses were persistent or extended JIA(33.3%), poly-articular JIA(30.3%), enthesitis-related JIA(21.2%) or systemic arthritis(15.1%).

**Intervention:**The transition programme comprises 8 key components: (a)transition coordinator; (b)providing information and education; (c)availability by telephone; (d)information about and contact with adult care programme; (e)guidance of parents; (f)meeting with peers; (g)transfer plan; and (h)actual transfer to adult care.

**Primary and secondary outcomes:**The primary outcome was health status, as perceived by the adolescents. Secondary outcomes were health status, as perceived by the parents; medication adherence; illness-related knowledge; quality-of-life; fatigue; promotion of independence; support of autonomy; behavioural control; and psychological control.

**Results:**At baseline, the median score on psychosocial health was 69.17 (Q1=60.00;Q3=92.92) and 68.75 (Q1=56.25;Q3=89.06) on physical health. Rheumatic-specific health scores ranged from 62.50 to 100.00.

**Conclusions:**We present the rationale and design of a study intended to evaluate a transition programme for adolescents with JIA as a brief intervention, and provided baseline data.

**ARTICLE SUMMARY***Article focus*

- The content of our transition programme for young people with JIA designed as a brief intervention is described.
- The rationale and design of a new mixed-methods approach for studying the clinical impact of a brief interventional transition programme for young persons with juvenile idiopathic arthritis is provided.

*Key messages*

- The developed transition programme contains five steps: (1) introduction of the transition coordinator at an outpatient visit at paediatric rheumatology; (2) a second face-to-face visit that takes place at paediatric rheumatology; (3) adolescent-information day; (4) individual transfer plan; and (5) transfer to adult rheumatology care.
- The transition programme comprise eight essential key components that are implemented in one or more of the five steps: (a) a transition coordinator; (b) providing information and education about JIA and medication management, health behaviour, dealing with fatigue, school, friends and any problems with medication adherence; (c) availability by telephone; (d) information about and contact with the adult rheumatology programme; (e) guidance of parents; (f) meeting with peers; (g) a transfer plan; and (h) the actual transfer to adult rheumatology programme.

*Strength and limitations*

- A transition programme for adolescents with JIA is developed as a brief intervention, which is less costly and time-consuming.
- The development and evaluation of transition programmes is guided by the initial MRC framework for complex interventions.
- The employment of a sequential mixed-method approach within this complex intervention framework enables to gain better and integrative insight into the clinical impact of the key components of the transition programme.

## BACKGROUND

Some decades ago, several paediatric disorders were associated with high, progressive morbidity and increased mortality. For many people suffering from these chronic diseases, medical, surgical, and technological advancements have resulted in improved disease management and increased life expectancy. Unlike in past decades, children with a progressive deteriorating disorder now often live into adulthood managing a chronic disease. Expert lifetime care should be provided in order to maximise lifelong functioning and potential of these people.

Adolescents with chronic conditions undergo different stages during their life wherein at least two important phenomena occur. First, they transition developmentally into adulthood, evolving from a dependent child to an independent adult [1]. Second, their health care transfers from a paediatric context to an adult one. Indeed, a timely and well-prepared transfer to adult-centred care is advocated [2,3]. This transfer is defined specifically as *an event or series of events through which adolescents and young adults with chronic physical and medical conditions move their care from a paediatric to an adult health care environment* [4]. According to the recent literature, the paediatric-to-adult care transfer should be preceded by a preparatory phase: *“a process by which adolescents and young adults with chronic childhood illnesses are prepared to take charge of their lives and their health in adulthood”* [4].

In order to prepare adolescents to take on new responsibilities for their health and to anticipate the imminent transfer to adult care, transition programmes have been developed. The efficacy of these transition programmes have been evaluated to some extent in the last decade [5-11]. Using quasi-experimental designs, investigators have found some positive effects on quality of life [8], disease outcomes [5,7], number of admissions and length of stay of readmissions [7], knowledge [8], work experience and career advice [8], and satisfaction with care [10]. The vast majority of the studies have been conducted in the United Kingdom [12], which may limit the generalisability of study findings to other health care systems. Therefore, research on the efficacy of transition programmes in other countries is warranted [12].

Existing transition programmes generally adopt a comprehensive approach, likely contributing to their positive effects. However, they are also costly and time-consuming to implement in day-to-day practice. This is illustrated by the finding that the most frequently perceived barriers to the formal transition of patients are limited time and lack of funding for a transition coordinator [13,14]. Hence, the cost-effectiveness of transition

1  
2  
3 programmes can be questioned. In times of economic crisis and limited funding, more sustainable alternatives  
4 must be explored. Brief interventions have the potential to be cost-effective. The cost-effectiveness of these  
5 brief evidence-based interventions, therefore, would increase the possibility of their being implemented in  
6 clinical practice.  
7  
8  
9

10  
11 Transition programmes can be viewed as complex interventions. Complex interventions are built up  
12 from a number of components that may act both independently and interdependently [15]. This implies that  
13 the active ingredient of the intervention is unknown or difficult to specify. The British Medical Research Council  
14 (MRC) has provided a framework for developing and evaluating complex interventions. It entails a recursive  
15 process of development, feasibility and piloting, evaluation, and implementation of the complex intervention.  
16 Hence, before any formal efficacy assessment can be done, comprehensive preparatory work is conducted  
17 [15].  
18  
19  
20  
21  
22  
23  
24

25 The original model of the MRC comprised an investigative sequence of five phases (Figure 1). First,  
26 theory and evidence are assessed in order to provisionally identify the steps and the key components of the  
27 intervention; this is termed the preclinical phase. Second, an understanding of the intervention and its possible  
28 effects is developed; this is termed phase I: modelling phase. Third, feasibility of key components are assessed,  
29 and recruitment procedures and measurement of outcomes are tested; this is termed phase II: exploratory trial  
30 phase. Fourth, randomised controlled trials are conducted to evaluate the complex intervention. These trials  
31 require adequate power, adequate randomisation, appropriate outcome measures, and other standard  
32 features of well-designed trials; this is termed phase III: definitive randomised controlled trial. Finally, separate  
33 studies are conducted to establish the long-term and real-life effectiveness of the intervention; this is termed  
34 phase IV: long-term implementation [15,16].  
35  
36  
37  
38  
39  
40  
41  
42  
43  
44

45 \*\*\* INSERT FIGURE 1 ABOUT HERE\*\*\*  
46  
47

48 In order to develop and test a transition programme involving a complex and brief intervention, we  
49 established the DON'T RETARD project (**D**evices for the **O**ptimizati**N** of **T**Ransf**E**r and **T**ransition of **A**dolescents  
50 with **R**heumatic **D**isorders). This was designed for young people with juvenile idiopathic arthritis (JIA)  
51 (<http://www.kuleuven.be/switch2/rheuma.html>) and aimed for providing proof of concept for a transition  
52 programme devised as a brief intervention. We followed the original MRC framework for complex  
53 interventions. As part of the modelling phase, we conducted some preparatory studies that were previously  
54  
55  
56  
57  
58  
59  
60

1  
2  
3 published [14,17]. The next step in the DON'T RETARD project is to evaluate the newly developed transition  
4  
5 programme.

6  
7 In the present article, we describe (1) the content of our transition programme for young people with  
8  
9 JIA designed as a brief intervention, and (2) the rationale and design of the evaluation of this transition  
10  
11 programme using a mixed-methods approach. The following hypotheses were tested: The transition  
12  
13 programme improves the physical, psychosocial, and rheumatic-specific health of adolescents with JIA (primary  
14  
15 outcome) [8,18]. We also hypothesised that the programme improves medication adherence, illness-related  
16  
17 knowledge, quality of life, threshold to fatigue, and parenting style (secondary outcomes). To guarantee  
18  
19 transparency and quality of reporting our complex intervention, we used the recently published criteria for  
20  
21 reporting the development and evaluation of complex interventions (CReDECI) [19].  
22  
23

#### 24 25 **Transition programme as a brief intervention**

26  
27 Our transition programme, which is designed to be a brief intervention, contains five steps. We will  
28  
29 describe in turn each step in the next section.  
30

#### 31 *Intervention steps*

32  
33  
34 **(1)** The first step occurs during a scheduled outpatient visit. The paediatric rheumatologist introduces  
35  
36 the transition coordinator (TC) to the patient and his or her parents, and explains the transition programme.  
37  
38 During this first face-to-face visit with the TC, the TC provides the patient and parents with a rheumatology  
39  
40 management diary, written information about JIA and medication management, and a DVD with instructions  
41  
42 regarding appropriate exercising. The TC guides the adolescent and parents through three patient information  
43  
44 websites and presents a video about JIA and its consequences. Also, the second face-to-face visit is scheduled.  
45  
46 The initial contact session lasts about 30-40 minutes. The TC is available by telephone to answer additional  
47  
48 questions about the condition, therapy, transition process, health behaviour, and clinic appointments.  
49

50  
51 **(2)** The second step of the intervention occurs six months later. This consists of a second face-to-face  
52  
53 visit that takes place at the outpatient clinic. During this visit, the TC focuses on health behaviour, dealing with  
54  
55 fatigue, school, friends, self-image, knowledge about the disease, and any difficulties with medication  
56  
57 adherence. Participants receive a folder about the practical issues related to the adult rheumatology  
58  
59  
60

1  
2  
3 programme (e.g., contact information for the secretary and rheumatologists, organisational information for the  
4  
5 outpatient clinic, etc.). This session lasts 20-30 minutes.  
6

7 **(3)** For the third step of the intervention, patients and their parents are invited to attend an  
8  
9 adolescent information day. On this day, all patients who attended their second visit with the TC are invited to  
10  
11 come together. The adolescent information day has two parallel programmes: one for the adolescents and one  
12  
13 for the parents. The programme for adolescents begins with a brief introduction from the TC and the paediatric  
14  
15 rheumatologist. Then the adolescents take part in a variety of activities: They meet with peers, take an  
16  
17 orientation tour of the adult care facilities, meet with the rheumatologists and nurse specialist of the adult  
18  
19 rheumatology team, meet the physiotherapist(s) of the adult rheumatology team, and attend a workshop on  
20  
21 psychological issues. These activities are followed by a cooking workshop, in which the adolescents prepare a  
22  
23 complete meal for themselves and their parents. This allows them to talk with their peers in an informal  
24  
25 setting.  
26

27  
28 The parallel programme for parents during this third step of the intervention is similar. A parent  
29  
30 association representative is available so that the parents could express their concerns about their child's  
31  
32 entering adulthood. Activities include taking an orientation tour of the adult care facilities, meeting with the  
33  
34 rheumatologists and nurse specialist of the adult rheumatology team, and attending a lecture on psychological  
35  
36 issues inherent to the development of an adolescent with chronic disorders. After the formal programme,  
37  
38 parents join their children for the dinner prepared by the children. The adolescent information day starts at  
39  
40 14.00 h and ends at 18.30 h, and takes place twice during the transition programme. For each information day,  
41  
42 about 15 patient-parents dyads participate.  
43

44 **(4)** For the fourth step, the TC develops an individual patient transfer plan for each patient. This occurs  
45  
46 before transferring from paediatric rheumatology to adult rheumatology. The transfer plan is based on the  
47  
48 coding structure of the International Classification of Functioning, Disability and Health for Children and Youth  
49  
50 (ICF-CY). By shifting the focus from cause to impact, the ICF-CY puts all health conditions on an equal footing,  
51  
52 allowing them to be compared using a common metric. Furthermore, it takes into account the social aspects of  
53  
54 a disability and does not view disability only as a 'medical' or 'biological' dysfunction. By including contextual  
55  
56 factors, in which environmental factors are listed, the ICF-CY allows us to record the impact of an environment  
57  
58 on a person's functioning. The transfer plan also is based on patient information collected by the paediatric  
59  
60



1  
2  
3 rheumatologist, the TC, and other health care professionals that are consulted. The development of a transfer  
4  
5 plan requires 30 minutes per patient.  
6

7 (5) The fifth step is the actual transfer. Once the transfer plan is handed over to the adult  
8  
9 rheumatologist, the patient is considered transferred to adult rheumatology care. The third face-to-face visit  
10  
11 with the TC occurs during the patient's first outpatient visit to adult rheumatology care. This time, the  
12  
13 rheumatologist of the adult rheumatology programme joins the session, along with the TC, patient, and  
14  
15 parents. The TC focuses on health behaviour and medication information. During this outpatient visit, the  
16  
17 patient is formally 'handed over' to the adult rheumatology providers. This session lasts about 20 minutes.  
18

#### 19 *Intervention key components*

20  
21  
22 The transition programme comprise 8 essential key components that are implemented in one or more  
23  
24 of the five steps: (a) a transition coordinator; (b) providing information and education about JIA and medication  
25  
26 management, health behaviour, dealing with fatigue, school, friends and any problems with medication  
27  
28 adherence; (c) availability by telephone; (d) information about and contact with the adult rheumatology  
29  
30 programme; (e) guidance of parents; (f) meeting with peers; (g) a transfer plan; and (h) the actual transfer to  
31  
32 adult rheumatology programme.  
33

34  
35 Altogether, the TC spends 60 to 90 minutes per patient, spread over a period of 1.5 years. This is in  
36  
37 addition to the 40 man-hours (for the TC, paediatric rheumatologists, rheumatologists of the adult setting,  
38  
39 physiotherapists, nurses of adult rheumatology, psychologists) incurred by the adolescent information day  
40  
41 activities and the 20 hours needed for its preparation. Overall, for this brief intervention, one full-time  
42  
43 equivalent from the different disciplines involved in rheumatologic care could take on a caseload of 250 to 300  
44  
45 patients.  
46  
47  
48

#### 49 **METHODS AND DESIGN**

50  
51 To develop and evaluate the transition programme, we applied a mixed-method approach in which  
52  
53 quantitative and qualitative studies are combined. More specifically, we used an 'embedded experimental  
54  
55 design' [20]. This design is characterised by qualitative studies conducted before and after a quantitative study.  
56  
57 In our project, the embedded experimental design started with a qualitative study using in-depth interviews.  
58  
59  
60

1  
2  
3 The aim of the interviews was to better understand the transitional needs of young people with JIA. The  
4 information obtained in this qualitative study assisted us in developing the transition programme. Hence, this  
5 particular qualitative study corresponds to the modelling phase of the MRC framework (Figure 1, green box).  
6  
7 The methods and results of this qualitative study are reported in two related articles [21,22]. Therefore, we do  
8  
9 not elaborate on this study in the present article.  
10  
11

12  
13 Subsequently, we conducted a quasi-experimental study employing a 'one-group pretest-posttest,  
14 with a non-equivalent posttest-only comparison group design' (Figure 1, purple box; Figure 2). In this  
15 quantitative study, we investigated the clinical outcomes of patients with JIA and their parents who  
16 participated in the transition programme. In this respect, longitudinal analyses were conducted to investigate  
17 changes over time (Figures 1, 2; indicated in red). Furthermore, comparative analyses were performed by  
18 comparing the posttest scores of the intervention group with those of patients who received usual care  
19 (Figures 1, 2; indicated in blue). This quantitative study (which included longitudinal and comparative analyses)  
20 is called study 1. After the quantitative study, a second qualitative study using an explanatory design was  
21 conducted (study 2; indicated in orange). In study 2, we elaborated on the experiences of adolescents with JIA  
22 and their parents on their participation in the transition programme. Both studies 1 and 2 are considered to  
23 correspond to the exploratory trial phase of the MRC framework (see above, Background section).  
24  
25  
26  
27  
28  
29  
30  
31  
32  
33  
34  
35  
36  
37  
38  
39  
40  
41  
42  
43  
44

\*\*\* INSERT FIGURE 2 HERE \*\*\*

#### 45 **Study 1.a. Quantitative study: longitudinal analysis**

##### 46 ***Inclusion criteria***

47  
48 Potential subjects were recruited during a scheduled visit at the outpatient clinic, between February 1, 2009,  
49 and February 1, 2011. Dutch-speaking adolescents (14-16 years of age) with JIA, treated and in active follow-up  
50 at the Department of Paediatric Rheumatology of the University Hospitals of Leuven, were invited to  
51 participate in the intervention trial. Patients were excluded if they were mentally retarded or if they did not  
52  
53  
54  
55  
56  
57  
58  
59  
60

1  
2  
3 have the physical capacities to complete the questionnaires used in the study. The convenience sample  
4  
5 included all eligible subjects.  
6  
7

### 8 9 ***Informed consent***

10  
11 Patients were included after obtaining written informed consent from the parents and informed assent from  
12  
13 the patients (all patients were minors at the time of inclusion). Anonymity was guaranteed, and patients and  
14  
15 parents were assured that they could stop participating at any time.  
16  
17

### 18 19 20 ***Variables and measurements***

21  
22 All subjects were assessed three times: at baseline ( $T_0$ ), at the second outpatient visit at paediatric  
23  
24 rheumatology ( $T_1$ ), and at the first outpatient rheumatology consultation in the adult care setting ( $T_2$ ) (Figure  
25  
26 2). We measured the primary outcome, secondary outcomes, and disease parameters. The primary outcome  
27  
28 was self-perceived health status of the adolescents, as measured with the Pediatric Quality of Life Inventory  
29  
30 (PedsQL). We used both the generic (PedsQL™ 4.0 Generic Core Scales) and the disease-specific module  
31  
32 (PedsQL 3.0 Rheumatology Module) [23,24].  
33  
34

35 We measured the following secondary outcomes salient to the adolescents: adolescents' health  
36  
37 status as perceived by their parents, which was measured with the PedsQL™ 4.0 Generic Core Scales and  
38  
39 PedsQL 3.0 Rheumatology Module [23,24]; medication adherence, which was measured using a Visual  
40  
41 Analogue Scale (VAS) and the Swiss HIV Cohort Study Adherence Questionnaire (SHCS-AQ) [25]; illness-related  
42  
43 knowledge, which was measured using the modified Patient Knowledge Questionnaire (PKQ) [26]; global  
44  
45 quality of life, which was measured using a Linear Analogue Scale (LAS) [27]; and fatigue, which was measured  
46  
47 using the Multidimensional Fatigue Inventory (MFI-20) [28]. For parents, the secondary outcomes that we  
48  
49 measured were as follows: promotion of independence, which was measured using the Promotion of  
50  
51 Independence Scale [29]; support of autonomy, which was measured using the Autonomy Support Scale [30];  
52  
53 behavioural control, which was measured using the Parental Regulation Scale [31]; and psychological control,  
54  
55 which was measured using the Psychological Control Scale [31]. These outcomes are all suboptimal in patients  
56  
57  
58  
59  
60

1  
2  
3 with JIA [29,31-34]. We hypothesised that participation in the transition programme could improve medication  
4 adherence, illness-related knowledge, quality of life, fatigue, and parenting style.

5  
6 With regard to disease parameters, we evaluated the clinical presence/absence of disease activity;  
7  
8 clinical remission on medication; clinical remission off medication; and functional status, as assessed by the  
9  
10 patient-reported and parent-reported Child Health Assessment Questionnaire (CHAQ-DI) [35,36]. Detailed  
11  
12 information about the assessments and instruments used in this study is shown in Table 1.  
13  
14  
15  
16  
17  
18  
19  
20  
21  
22  
23  
24  
25  
26  
27  
28  
29  
30  
31  
32  
33  
34  
35  
36  
37  
38  
39  
40  
41  
42  
43  
44  
45  
46  
47  
48  
49  
50  
51  
52  
53  
54  
55  
56  
57  
58  
59  
60

For peer review only

Table 1 Overview of variables and measurements in the quantitative study

| Variable                  | Measurement                                                                            | Report    | Items | Validity                                                                                                                   | Reliability                                                                                                                                                                                                                                                                                                                                                                                                                                                                                                                                                                                           | Responsiveness                                             | Interpretation                                                                                                                                     |
|---------------------------|----------------------------------------------------------------------------------------|-----------|-------|----------------------------------------------------------------------------------------------------------------------------|-------------------------------------------------------------------------------------------------------------------------------------------------------------------------------------------------------------------------------------------------------------------------------------------------------------------------------------------------------------------------------------------------------------------------------------------------------------------------------------------------------------------------------------------------------------------------------------------------------|------------------------------------------------------------|----------------------------------------------------------------------------------------------------------------------------------------------------|
| Perceived health status   | <i>Pediatric Quality of Life Inventory (PedsQL™ 4.0) Generic Core Scale</i>            | PAT & PAR | 23    | construct validity confirmed (Varni et al., 2003), p. 333-335; (Varni et al., 2001), p. 809; (Varni et al., 2002b), p. 719 | <ul style="list-style-type: none"> <li>internal consistency confirmed</li> <li><i>adolescents' self-report</i>: total score, <math>\alpha=0.91-0.92</math>; physical health, <math>\alpha=0.83-0.90</math>; psychosocial health, <math>\alpha=0.87-0.89</math></li> <li><i>parents' proxy report</i>: total score, <math>\alpha=0.92-0.94</math>; physical health, <math>\alpha=0.88</math>; psychosocial health, <math>\alpha=0.89-0.91</math> (Varni et al., 2003), p. 335; (Varni et al., 2002b), p. 718</li> </ul>                                                                                | responsiveness confirmed (Varni et al., 2002b), p. 721-722 | <ul style="list-style-type: none"> <li>scores from 0-100</li> <li>higher scores indicate a better perceived health status</li> </ul>               |
|                           | <i>Pediatric Quality of Life Inventory (PedsQL™ 3.0) Rheumatology Module</i>           | PAT & PAR | 22    | construct validity confirmed (Varni et al., 2002b), p. 720-721                                                             | <ul style="list-style-type: none"> <li>internal consistency confirmed</li> <li><i>adolescents' self-report</i>: pain and hurt, <math>\alpha=0.90</math>; daily activities, <math>\alpha=0.84</math>; treatment, <math>\alpha=0.77</math>; worry, <math>\alpha=0.81</math>; communication, <math>\alpha=0.79</math></li> <li><i>parents' proxy report</i>: pain and hurt, <math>\alpha=0.90</math>; daily activities, <math>\alpha=0.89</math>; treatment, <math>\alpha=0.77</math>; worry, <math>\alpha=0.80</math>; communication, <math>\alpha=0.91</math> (Varni et al., 2002b), p. 718</li> </ul> | responsiveness confirmed                                   | <ul style="list-style-type: none"> <li>scores from 0-100</li> <li>higher scores indicate a better perceived rheumatologic health status</li> </ul> |
| Medication adherence      | <i>SWISS HIV Cohort Study Adherence Questionnaire SHCS-AQ</i> (Deschamps et al., 2008) | PAT       | 3     | NR                                                                                                                         | NR                                                                                                                                                                                                                                                                                                                                                                                                                                                                                                                                                                                                    | NR                                                         | medication adherent or non-adherent                                                                                                                |
| Illness-related knowledge | <i>The Modified Patient Knowledge Questionnaire (PKQ)</i>                              | PAT       | 16    | content validity confirmed (Hilderson et al., 2011)                                                                        | NR                                                                                                                                                                                                                                                                                                                                                                                                                                                                                                                                                                                                    | NR                                                         | <ul style="list-style-type: none"> <li>scores from 0 to 100</li> <li>higher scores indicate more illness-related knowledge</li> </ul>              |
| Global quality of life    | <i>Linear Analogue Scale (LAS)</i>                                                     | PAT       | 1     | content validity confirmed; construct validity confirmed (Moons et al., 2006), p.410                                       | stability confirmed (ICC=0.65; $P < 0.001$ ) (Moons et al., 2006), p.410                                                                                                                                                                                                                                                                                                                                                                                                                                                                                                                              | responsiveness confirmed (Moons et al., 2006), p.410       | scores from 0 (worst imaginable quality of life) to 100 (best imaginable quality of life)                                                          |
| Fatigue                   | <i>Multidimensional Fatigue Inventory</i>                                              | PAT       | 20    | construct validity                                                                                                         | internal consistency                                                                                                                                                                                                                                                                                                                                                                                                                                                                                                                                                                                  | responsiveness                                             | • scores from 4-20                                                                                                                                 |

|                                                                                                                                                  |                                                                                                       |           |    |                                                             |                                                                                                                                                                                                                            |                                   |                                                                                               |
|--------------------------------------------------------------------------------------------------------------------------------------------------|-------------------------------------------------------------------------------------------------------|-----------|----|-------------------------------------------------------------|----------------------------------------------------------------------------------------------------------------------------------------------------------------------------------------------------------------------------|-----------------------------------|-----------------------------------------------------------------------------------------------|
|                                                                                                                                                  | (MFI-20)                                                                                              |           |    | confirmed (Lin et al., 2009), p. 6                          | confirmed:<br>general fatigue, $\alpha=0.82$ ;<br>physical fatigue, $\alpha=0.81$ ;<br>reduced activity, $\alpha=0.82$ ;<br>reduced motivation, $\alpha=0.71$ ;<br>mental fatigue, $\alpha=0.86$ (Lin et al., 2009), p.4-6 | confirmed (Lin et al., 2009), p.6 | • higher scores indicate a higher degree of fatigue                                           |
| <b>Parenting dimensions</b>                                                                                                                      |                                                                                                       |           |    |                                                             |                                                                                                                                                                                                                            |                                   | • scores from 1 to 5                                                                          |
| <b>a. promotion of independence</b>                                                                                                              | <i>Promotion Independence Scale (PI)</i>                                                              |           | 8  | NR                                                          | internal consistency confirmed ( $\alpha=.76$ ) (Soenens et al., 2007), p.17                                                                                                                                               | NR                                | a. higher scores indicate more promotion of independence                                      |
| <b>b. support of autonomy</b>                                                                                                                    | <i>Autonomy Support Scale (PVF)</i>                                                                   |           | 7  | NR                                                          | internal consistency confirmed ( $\alpha=0.70-0.72$ ) (Kins et al., 2009), p.1420                                                                                                                                          | NR                                | b. higher scores indicate more support of autonomy                                            |
| <b>c. behavioural control</b>                                                                                                                    | <i>Parental Regulation Scale (PRS-YSR revised to parent self-report)</i>                              |           | 16 | construct validity confirmed (Soenens et al., 2006), p. 309 | NR                                                                                                                                                                                                                         | NR                                | c. higher scores indicate more behavioural control                                            |
| <b>d. psychological control</b>                                                                                                                  | <i>Psychological Control Scale (PCS-YSR revised to parent self-report)</i>                            |           | 8  | NR                                                          | internal consistency confirmed ( $\alpha=0.69$ ) (Soenens et al., 2006), p.545-546                                                                                                                                         | NR                                | d. higher scores indicate more psychological control                                          |
| <b>Absence of disease activity</b> (Wallace et al., 2004)                                                                                        |                                                                                                       | MD        | NA | NA                                                          | NA                                                                                                                                                                                                                         | NA                                | inactive disease or active disease                                                            |
| Two types of <b>clinical remission</b> :<br>(a) Clinical remission on medication<br>(b) Clinical remission off medication (Wallace et al., 2004) |                                                                                                       | MD        | NA | NA                                                          | NA                                                                                                                                                                                                                         | NA                                | no clinical remission, clinical remission on medication, or clinical remission off medication |
| <b>Functional status</b>                                                                                                                         | <i>Childhood Health Assessment Questionnaire (CHAQ-DI)</i> (Ouwkerk et al., 2008; Singh et al., 1994) | PAT & PAR | 30 | construct validity confirmed (Takken et al., 2006), p. 980  | NR                                                                                                                                                                                                                         | NR                                | scores from 0 (good functional status) to 3 (poor functional status)                          |

Legend: ICC, intra-class correlation; MD, medical doctor; NA, not applicable; NR, not reported; PAT, patient; PAR, parent.

### **Data analysis**

Since this study was an exploratory trial formulated according to the MRC framework of complex interventions, our aim was not to test the efficacy of the transition programme; rather it was a 'proof of concept' for the transition programme concept as a brief intervention. Therefore, we did not look for statistical significances but rather for clinical differences. Differences in patient- and parent-related outcomes, which were measured continuously starting at T<sub>0</sub> (before intervention) to T<sub>2</sub> (after intervention), were expressed as effect sizes.

For continuous variables, an effect size for the Wilcoxon test was calculated by using  $r = Z/\sqrt{n}$ , where Z is the normal approximation of the Wilcoxon test statistic. To appraise the magnitude of the effect sizes, we used Cohen's r. An effect size of 0.1 to 0.3 is considered to be small, whereas effects sizes of 0.3 to 0.5 and 0.5 or higher are considered to be medium and large, respectively [37].

Adherence was dichotomised as adherent or non-adherent. For this outcome, odds ratios were calculated to report the effect size. The odds ratio is the ratio of the odds of an outcome (e.g., being adherent) of one group (T<sub>0</sub>, before intervention), to the odds of the outcome of the other group (T<sub>2</sub>, after intervention). To appraise the magnitude of this odds ratio, we used the following suggested cut-off values for the odds ratios: 1.5 to 2.5 is a small effect; 2.5 to 4.3 is a medium effect; and 4.3 or higher is a large effect [38,39].

Nominal data were expressed in frequencies and percentages. Medians and quartiles (Q1-Q3) were calculated for continuous, non-normally distributed variables.

### **Baseline data**

The sample consisted of 33 adolescents, 25 of which were female and 8 male. Detailed information about JIA subtype, medication prescription and remission status (on or off therapy) and the outcome data is shown in Table 2.

Table 2. Demographic, clinical characteristics and outcome data of 33 adolescents with JIA at baseline

| Baseline data                                                                  | (n = 33)              |
|--------------------------------------------------------------------------------|-----------------------|
| <b>gender</b>                                                                  |                       |
| female                                                                         | 25 (75.8%)            |
| male                                                                           | 8 (24.2%)             |
| <b>subtype</b>                                                                 |                       |
| persistent/ext. JIA                                                            | 11 (33.3%)            |
| poly JIA (RF-, RF+)                                                            | 10 (30.3%)            |
| systemic arthritis                                                             | 5 (15.1%)             |
| enthesitis-related arthritis                                                   | 7 (21.2%)             |
| age median, in years (Q <sub>1</sub> ;Q <sub>3</sub> )                         | 15.99 (15.15;17.12)   |
| disease activity                                                               | 10 (30.3%)            |
| functionality <sub>ado</sub> (Q <sub>1</sub> ;Q <sub>3</sub> )                 | 0.25 (0.13;0.63)      |
| clinical remission on therapy                                                  | 17 (51.5%)            |
| clinical remission off therapy                                                 | 5 (15.2%)             |
| medication prescribed                                                          | 23 (69.7%)            |
| NSAIDS                                                                         | 14 (60.9%)            |
| DMARDS                                                                         | 10 (43.5%)            |
| biologicals                                                                    | 6 (26.0%)             |
| glucocorticosteroids                                                           | 4 (17.4%)             |
| <b>Primary outcome data adolescents median (Q<sub>1</sub>;Q<sub>3</sub>)</b>   |                       |
| psychosocial health (generic)                                                  | 69.17 (60.00;92.92)   |
| physical health (generic)                                                      | 68.75 (56.25;89.06)   |
| treatment (rheumatology)                                                       | 76.79 (71.43;100.00)  |
| communication (rheumatology)                                                   | 75.00 (66.67;91.67)   |
| pain and hurt (rheumatology)                                                   | 62.50 (50.00;93.75)   |
| daily activities (rheumatology)                                                | 100.00 (91.25;100.00) |
| worry (rheumatology)                                                           | 75.00 (66.67;91.67)   |
| <b>Secondary outcome data adolescents median (Q<sub>1</sub>;Q<sub>3</sub>)</b> |                       |
| quality of life                                                                | 73.00 (68.5;90.00)    |
| illness related knowledge                                                      | 31.25 (18.75;43.75)   |
| motivation                                                                     | 7.00 (5.25;9.00)      |



|                                                                            |                      |
|----------------------------------------------------------------------------|----------------------|
| mental fatigue                                                             | 9.5 (7.00;12.75)     |
| activity                                                                   | 9.50 (7.00;12.00)    |
| physical fatigue                                                           | 9.50 (6.25;13.75)    |
| general fatigue                                                            | 9.50 (7.25;13.00)    |
| <b>Secondary outcome data adolescents (%)</b>                              |                      |
| medication adherence                                                       | 23 (69.70%)          |
| <b>Secondary outcome data parents median (Q<sub>1</sub>;Q<sub>3</sub>)</b> |                      |
| autonomy support                                                           | 3.83 (3.33;4.33)     |
| promotion of independence                                                  | 3.38 (3.13;1.75)     |
| behavioural control                                                        | 4.00 (3.60;4.30)     |
| psychological control                                                      | 2.00(1.75;2.50)      |
| psychosocial health (generic)                                              | 85.00 (71.67;90.00)  |
| physical health (generic)                                                  | 73.00 (56.25;96.88)  |
| treatment (rheumatology)                                                   | 89.29 (71.43;97.32)  |
| communication (rheumatology)                                               | 75.00 (64.58;91.67)  |
| pain and hurt (rheumatology)                                               | 84.38 (50.00;95.31)  |
| daily activities (rheumatology)                                            | 100 (90.00;100.00)   |
| worry (rheumatology)                                                       | 91.67 (66.67;100.00) |

### ***Ethical issues***

The Institutional Review Board of the University Hospital Leuven, Belgium, evaluated and approved the study protocol (B32220096363). This study was performed with ethical standards as described in the latest Declaration of Helsinki.

### **Study 1.b. Quantitative study: comparative analysis**

#### ***Inclusion criteria***

The intervention group's subject inclusion criteria were described above. The comparison group consisted of adolescents aged 17-23 years, who already had been transferred to the adult rheumatology programme. These patients were transferred from paediatric rheumatology to the adult programme without participating in a specific self-management/transition programme (i.e., they received the usual care). The comparison group

1  
2  
3 subjects were recruited from four different health centres in Belgium. Those who were mentally retarded or  
4  
5 did not have the physical capacities to complete the questionnaires used in the study were excluded. Subjects  
6  
7 of the comparison group were included in the analyses if they could be matched with an intervention group  
8  
9 subject in terms of disease activity, medication prescribed, JIA subtype, and gender.

#### 10 11 12 13 **Definition of usual care**

14  
15  
16 For the purposes of this study, usual care is defined as the care that is currently provided in day-to-day clinical  
17  
18 practice. Adolescents are usually followed up at the paediatric rheumatology programme until the age of 16  
19  
20 years. Around that age, the adolescent might have a first outpatient visit with the adult rheumatologist and the  
21  
22 paediatric rheumatologist together. When the rheumatologists, the patient, and his or her parents agree that  
23  
24 the patient is ready for transfer, an appointment for an adult rheumatology consultation is made. No transition  
25  
26 coordinator or formal transition plan is used.

#### 27 28 29 30 31 **Informed consent from comparison group subjects**

32  
33 We used the same procedure described above that we used for the intervention group.  
34  
35  
36  
37

#### 38 39 40 41 **Variables and measurements**

42  
43 The variables and measurements used in these comparative analyses were the same as those used in the  
44  
45 longitudinal analyses (see above). The measures for the comparison group were acquired during one of the  
46  
47 outpatient visits at the adult care clinic (T<sub>2</sub>) (see Figure 2).  
48

#### 49 50 51 52 **Data analysis**

53  
54 As with the longitudinal analyses, we were interested in clinical differences instead of statistical differences. In  
55  
56 the comparative analyses, the scores of the intervention and comparison groups at T<sub>2</sub> were compared. The cut-  
57  
58 off values used for the longitudinal analyses also were used for the comparative analyses.  
59  
60

### ***Ethical Issues***

The Institutional Review Board of the University Hospital Leuven, Belgium, evaluated and approved the study protocol (B32220096363). This study was performed with ethical standards as described in the latest Declaration of Helsinki.

## **Study 2. Qualitative study**

### ***Design***

We used an explanatory design to expand the quantitative results with qualitative data [20]. To gain insight into the processes underpinning the transition programme, we conducted in-depth interviews with the adolescents and parents of the intervention group. The specific aims of this qualitative study were (i) to get an understanding of the reasons why particular effects are observed and why others are not, and (ii) to evaluate the feasibility and the utility of the key components of the complex intervention from the patients' and parents' perspective.

### ***Inclusion criteria***

Those participating in the intervention group (adolescents and their parents) were purposively sampled and invited to take part in the interviews. Sampling continued until no new themes emerged from the data (i.e., until saturation of the data was reached).

### ***Informed consent***

Subjects were included in the qualitative study after we obtained written informed consent for this particular substudy. If the patient was a minor, informed consent was obtained from the parents and informed assent from the patient. Anonymity was guaranteed, and patients and parents were assured that they could stop the interview at any time.

### ***Data collection***

We employed a predefined interview guide, previously adjusted by an expert panel consisting of one rheumatologist (RW), one paediatric rheumatologist (CW), and three researchers (KV, PM, DH) in the field of care transition. We asked adolescents and parents to answer open-ended questions about the TC, the adolescent information day, the time of transfer, and general feelings about the transition programme intervention.

Adolescents and parents were interviewed at home, each in a different room. Different strategies were used to assess the trustworthiness of the research: investigator triangulation, bracketing, and building a relationship of trust with the subject. Investigator triangulation requires that more than one investigator collect and analyse the raw data, so that the findings emerge through a consensus of a team of investigators [40]. Bracketing is the process of identifying and holding in abeyance preconceived beliefs and opinions about the phenomenon under study [40]. Bracketing makes the researcher aware of his or her beliefs and opinions about the phenomenon under study. To build a trusting relationship with each subject, we made certain that the interviewers were not part of the therapeutic team and that the interviews took place in a room where the subject felt comfortable. These methods ensured that researcher-related bias was minimised.

### ***Data analysis***

The interviews were analysed by using qualitative content analysis, according to the method of Graneheim and Lundman [41]. Each interview was transcribed verbatim. The interviews were read through several times to obtain a good understanding of the content. The first step in the analysis was the identification of meaning units (i.e., constellations of words or statements that were related to the same central meaning). The meaning units were labelled with codes, which allowed the data to be considered in new and different ways. The second step in the analysis involved sorting the codes into themes. A theme is an expression of the latent content of the text. For each theme, its content was expressed in two categories. To ensure the trustworthiness of the analysis, the authors discussed the classification of codes, categories, and themes until consensus was reached.

### ***Ethical Issues***

1  
2  
3 The Institutional Review Board of the University Hospital Leuven, Belgium, evaluated and approved the study  
4 protocol. This study was performed with ethical standards as described in the latest Declaration of Helsinki.  
5  
6  
7  
8  
9

## 10 11 **DISCUSSION**

12  
13  
14 Previous studies have shown that the implementation of a comprehensive transition programme can have  
15 positive effects on several patient outcomes. We developed a transition programme as a brief intervention.  
16  
17 Implementation of these transition programmes in clinical practice may be more feasible, because we  
18 estimated that one full-time equivalent of manpower could take on a case load of 250 to 300 patients. In the  
19 present article, we describe the rationale and the design of a mixed-methods approach for evaluating the  
20 clinical impact of the transition programme for adolescents with JIA.  
21  
22  
23  
24

25  
26 Our study is innovative in four aspects. First, to the best of our knowledge, this is the first evaluation of  
27 a transition programme structured as a brief intervention. Brief interventions are usually conducted in a one-  
28 on-one situation and take shorter periods of time [42]. Brief interventions are predominantly used in the  
29 prevention and treatment of substance abuse [43], although they have been employed in other settings as well  
30 [44,45]. Shorter time-consuming interventions are in demand, since the current trend is to implement  
31 transition programmes through optimal time use and cost-efficacy.  
32  
33  
34  
35  
36  
37

38  
39 Second, we designed this brief intervention as a complex intervention and used the MRC framework to  
40 perform our evaluation. It is argued that even simple interventions can be complex undertakings, mixing  
41 elements of content, intensity, duration, and setting [42]. Therefore, clearly specifying the steps and  
42 components of a brief intervention is needed. For this purpose, we used the criteria for the development and  
43 evaluation of complex interventions (CReDECI) in health care [19].  
44  
45  
46  
47

48  
49 Within this complex intervention framework, we employed a sequential mixed-method approach,  
50 more specifically an embedded experimental design. This mixed-methods approach enabled us to gain better  
51 insight into the clinical impact of the key components of this complex intervention. Using this approach, we  
52 integrated the findings of the different studies.  
53  
54  
55  
56  
57  
58  
59  
60

1  
2  
3 Mixed-methods studies differ from multi-methods studies in that the latter involve a set of mono-  
4 method studies that use different designs and that are conducted independently. Although integration is highly  
5 advocated, it is seldom done. The reason can be explained in two ways [46]. First, researchers do not always  
6 make use of the various ways of integrating findings in their reports. They report the results of qualitative and  
7 quantitative components separately, or they report the qualitative and quantitative findings together without  
8 considering how they are related to each other. This indicates that researchers may be unaware of some of the  
9 unique insights available in mixed-methods studies. In our study, we looked for convergence, divergence, and  
10 discrepancy in the findings of both methods. This process is defined as crystallisation [46]. Indeed,  
11 crystallisation of results and exploration of definite discrepancies can lead to further insights. Second, the  
12 integration of data and findings from different components of a mixed-methods study is not always apparent in  
13 the articles emerging from them. This indicates that any unique insights available from mixed-methods studies  
14 may not be disseminated in ways that are attributable to mixed-methods studies.

15  
16  
17  
18  
19  
20  
21  
22  
23  
24  
25  
26  
27 Lastly, this study provides pilot data on the feasibility and impact of a brief transition programme for  
28 young persons with JIA. The data of this study can be used to design a randomised controlled trial testing the  
29 effectiveness of the programme in a robust way. Indeed, the effect size obtained in the present study can be  
30 used for power and sample size calculations for future studies. Admittedly, since the present study was  
31 conducted in persons with JIA, the data are not necessarily generalisable to other patient populations.

## 32 33 34 35 36 37 38 39 **CONCLUSION**

40  
41  
42 We present the rationale and design of a study intended to evaluate a transition programme for  
43 adolescents with JIA as a brief intervention. Here, we used the MRC framework. The embedded experimental  
44 design offered us the opportunity to obtain an overall picture of the clinical impact of the transition  
45 programme on adolescents with JIA who participated in it. It also allowed us to get an overall picture of how  
46 these adolescents experienced this programme. This study protocol was designed to evaluate our brief  
47 intervention. This evaluation enabled us to get more insight into the active components of our transition  
48 programme. Examination of key clinical and methodological uncertainties in the exploratory trial phase helps  
49 researchers to set up definite randomised controlled trials and guide long-term implementation.

**TRIAL STATUS**

The trial started February 1, 2009, and ended on February 1, 2011.

**ABBREVIATIONS**

|         |                                                                                |
|---------|--------------------------------------------------------------------------------|
| CHAQ-DI | Childhood Health Assessment Questionnaire                                      |
| CReDECI | Criteria for Reporting the Development and Evaluation of Complex Interventions |
| ICC     | Intra-class correlation                                                        |
| ICF     | International Classification of Functioning                                    |
| JIA     | juvenile idiopathic arthritis                                                  |
| LAS     | linear analogue scale                                                          |
| MD      | medical doctor                                                                 |
| MRC     | Medical Research Council                                                       |
| MVI-20  | Multidimensional Fatigue Index                                                 |
| NA      | not applicable                                                                 |
| NR      | not reported                                                                   |
| PAT     | patient                                                                        |
| PAR     | parent                                                                         |
| PCS-YSR | Psychological Control Scale – Youth Self Report                                |
| PedsQL  | Paediatric Quality of Life Inventory                                           |
| PI      | Promotion Independence Scale                                                   |
| PKQ     | Patient Knowledge Questionnaire                                                |
| PRS-YSR | Parental Regulation Scale                                                      |
| PVF     | Autonomy Support Scale                                                         |

|   |         |                                                |
|---|---------|------------------------------------------------|
| 1 |         |                                                |
| 2 |         |                                                |
| 3 | SHCS-AQ | Swiss HIV Cohort Study Adherence Questionnaire |
| 4 |         |                                                |
| 5 | TC      | transition coordinator                         |
| 6 |         |                                                |
| 7 |         |                                                |
| 8 | VAS     | visual analogue scale                          |
| 9 |         |                                                |

### **AUTHORS CONTRIBUTIONS**

15 PM, RW, CW, and DH were responsible for the concept and design of the study, and analysis and interpretation  
16 of the data. DH and KV collected the data. DH drafted the manuscript. PM, KV, EG, RW, and CW critically  
17 revised the manuscript for important intellectual content. All authors read and approved the final manuscript.  
18  
19

### **ACKNOWLEDGMENTS**

26 This study was supported by a scientific grant from the King Baudouin Foundation; Fonds voor  
27 wetenschappelijk reuma onderzoek (Fund for Scientific Rheumatism Research); and Clinical Research Fund of  
28 the University Hospitals Leuven, Belgium. These funding sources had no involvement in the collection, analysis,  
29 and interpretation of data. The authors thank all subjects who took part in and supported this study and this  
30 paper: the patients, parents, and rheumatology health care providers of both paediatric and adult  
31 rheumatology of the four participating centres/private practices. We also thank the administrative staff of the  
32 Department of Rheumatology of Ghent, the administrative staff of the Department of Musculoskeletal  
33 Sciences, and the administrative staff of the Department of Paediatric Rheumatology of Leuven.  
34  
35  
36  
37  
38  
39  
40  
41  
42  
43  
44

### **COMPETING INTERESTS**

47 The authors declare that they have no competing interests.  
48  
49  
50  
51  
52  
53  
54  
55  
56  
57  
58  
59  
60



## Reference List

- 1 Meleis AI: *Transitions Theory: Middle range and situation-specific theories in nursing research and practice*. New York: Springer Publishing Company; 2010.
- 2 American Academy of Pediatrics, American Academy of Family Physicians, American College of Physicians-American Society of Internal Medicine.: A consensus statement on health care transitions for young adults with special health care needs. *Pediatrics* 2002, **110**:1304-1306.
- 3 American Academy of Pediatrics, American Academy of Family Physicians, American College of Physicians, Transitions Clinical Report Authoring Group, Cooley WC, Sagerman PJ: Supporting the health care transition from adolescence to adulthood in the medical home. *Pediatrics* 2011, **128**:182-200.
- 4 Knauth A, Verstappen A, Reiss J, Webb GD: Transition and transfer from pediatric to adult care of the young adult with complex congenital heart disease. *Cardiol Clin* 2006, **24**:619-29, vi.
- 5 Chaturvedi S, Jones CL, Walker RG, Sawyer SM: The transition of kidney transplant recipients: a work in progress. *Pediatr Nephrol* 2009, **24**:1055-1060.
- 6 Craig SL, Towns S, Bibby H: Moving on from paediatric to adult health care: an initial evaluation of a transition program for young people with cystic fibrosis. *Int J Adolesc Med Health* 2007, **19**:333-343.
- 7 Holmes-Walker DJ, Llewellyn AC, Farrell K: A transition care programme which improves diabetes control and reduces hospital admission rates in young adults with Type 1 diabetes aged 15-25 years. *Diabet Med* 2007, **24**:764-769.
- 8 McDonagh JE, Southwood TR, Shaw KL: The impact of a coordinated transitional care programme on adolescents with juvenile idiopathic arthritis. *Rheumatology (Oxford)* 2007, **46**:161-168.
- 9 Remorino R, Taylor J: Smoothing things over: the transition from pediatric to adult care for kidney transplant recipients. *Prog Transplant* 2006, **16**:303-308.
- 10 Shaw KL, Southwood TR, McDonagh JE: Development and preliminary validation of the 'Mind the Gap' scale to assess satisfaction with transitional health care among adolescents with juvenile idiopathic arthritis. *Child Care Health Dev* 2007, **33**:380-388.
- 11 Steinkamp G, Ullrich G, Muller C, Fabel H, von der HH: Transition of adult patients with cystic fibrosis from paediatric to adult care--the patients' perspective before and after start-up of an adult clinic. *Eur J Med Res* 2001, **6**:85-92.
- 12 Hilderson D, Westhovens R, Wouters C, Moons P: Transitional care for adolescents with rheumatic diseases: urgent need for more research. *Child Care Health Dev* 2008, **34**:401-402.
- 13 Betz CL: Transition of adolescents with special health care needs: review and analysis of the literature. *Issues Compr Pediatr Nurs* 2004, **27**:179-241.

- 14 Hilderson D, Moons P, Westhovens R, Wouters C: Attitudes of rheumatology practitioners toward transition and transfer from pediatric to adult healthcare. *Rheumatol Int* 2012, **32**:3887-3896.
- 15 Craig P, Dieppe P, Macintyre S, Michie S, Nazareth I, Petticrew M: Developing and evaluating complex interventions: the new Medical Research Council guidance. *BMJ* 2008, **337**:a1655.
- 16 Campbell M, Fitzpatrick R, Haines A, Kinmonth AL, Sandercock P, Spiegelhalter D, Tyrer P: Framework for design and evaluation of complex interventions to improve health. *BMJ* 2000, **321**:694-696.
- 17 Hilderson D, Corstjens F, Moons P, Wouters C, Westhovens R: Adolescents with juvenile idiopathic arthritis: who cares after the age of 16? *Clin Exp Rheumatol* 2010, **28**:790-797.
- 18 Chaudhry SR, Keaton M, Nasr SZ: Evaluation of a cystic fibrosis transition program from pediatric to adult care. *Pediatr Pulmonol* 2012.
- 19 Mohler R, Bartoszek G, Kopke S, Meyer G: Proposed criteria for reporting the development and evaluation of complex interventions in healthcare (CRedeCI): guideline development. *Int J Nurs Stud* 2012, **49**:40-46.
- 20 Creswell JW, Plano Clark VL: *Designing and conducting mixed methods research*. Thousand Oaks, California: Sage Publications; 2007.
- 21 Eyckmans L, Hilderson D, Westhovens R, Wouters C, Moons P: What does it mean to grow up with juvenile idiopathic arthritis? A qualitative study on the perspectives of patients. *Clin Rheumatol* 2011, **30**:459-465.
- 22 Hilderson D, Eyckmans L, Van der Elst K, Westhovens R, Wouters C, Moons P: Transfer from paediatric rheumatology to the adult rheumatology setting: experiences and expectations of young adults with juvenile idiopathic arthritis. *Clin Rheumatol* 2012.
- 23 Varni JW, Seid M, Smith KT, Burwinkle T, Brown J, Szer IS: The PedsQL in pediatric rheumatology: reliability, validity, and responsiveness of the Pediatric Quality of Life Inventory Generic Core Scales and Rheumatology Module. *Arthritis Rheum* 2002, **46**:714-725.
- 24 Varni JW, Seid M, Knight TS, Uzark K, Szer IS: The PedsQL 4.0 Generic Core Scales: sensitivity, responsiveness, and impact on clinical decision-making. *J Behav Med* 2002, **25**:175-193.
- 25 Deschamps AE, De GS, Vandamme AM, Bobbaers H, Peetermans WE, Van WE: Diagnostic value of different adherence measures using electronic monitoring and virologic failure as reference standards. *AIDS Patient Care STDS* 2008, **22**:735-743.
- 26 Hilderson D, Moons P, Wouters C, Westhovens R: **Adolescents with juvenile idiopathic arthritis: what do they know about their condition? [abstract]**. *Annals of the Rheumatic diseases* 2011, **70**:756
- 27 Moons P, Van Deyk K, De Bleser L, Marquet K, Raes E, De Geest S, Budts W: Quality of life and health status in adults with congenital heart disease: a direct comparison with healthy counterparts. *Eur J Cardiovasc Prev Rehabil* 2006, **13**:407-413.

- 1  
2  
3 28 Lin JM, Brimmer DJ, Maloney EM, Nyarko E, Belue R, Reeves WC: Further validation of the  
4 Multidimensional Fatigue Inventory in a US adult population sample. *Popul Health Metr* 2009,  
5 **7**:18.  
6  
7 29 Soenens B, Vansteenkiste M, Lens W, Luyckx K, Goossens L, Beyers W, Ryan RM:  
8 Conceptualizing parental autonomy support: adolescent perceptions of promotion of  
9 independence versus promotion of volitional functioning. *Dev Psychol* 2007, **43**:633-646.  
10  
11 30 Kins E, Beyers W, Soenens B, Vansteenkiste M: Patterns of home leaving and subjective well-  
12 being in emerging adulthood: the role of motivational processes and parental autonomy  
13 support. *Dev Psychol* 2009, **45**:1416-1429.  
14  
15 31 Soenens B, Vansteenkiste M, Luyckx K, Goossens L: Parenting and adolescent problem  
16 behavior: an integrated model with adolescent self-disclosure and perceived parental  
17 knowledge as intervening variables. *Dev Psychol* 2006, **42**:305-318.  
18  
19 32 Eddy L, Cruz M: The relationship between fatigue and quality of life in children with chronic  
20 health problems: a systematic review. *J Spec Pediatr Nurs* 2007, **12**:105-114.  
21  
22 33 Russo E, Trevisi E, Zulian F, Battaglia MA, Viel D, Facchin D, Chiusso A, Martinuzzi A:  
23 Psychological profile in children and adolescents with severe course Juvenile Idiopathic  
24 Arthritis. *ScientificWorldJournal* 2012, **2012**:841375.  
25  
26 34 Ullrich G, Mattussek S, Dressler F, Thon A: How do adolescents with juvenile chronic arthritis  
27 consider their disease related knowledge, their unmet service needs, and the attractiveness of  
28 various services? *Eur J Med Res* 2002, **7**:8-18.  
29  
30 35 Ouwerkerk JW, van Pelt PA, Takken T, Helders PJ, Net J: Evaluating score distributions in the  
31 revised Dutch version of the Childhood Health Assessment Questionnaire. *Pediatr Rheumatol*  
32 *Online J* 2008, **6**:14.  
33  
34 36 Singh G, Athreya BH, Fries JF, Goldsmith DP: Measurement of health status in children with  
35 juvenile rheumatoid arthritis. *Arthritis Rheum* 1994, **37**:1761-1769.  
36  
37 37 Cohen J: A power primer. *Psychol Bull* 1992, **112**:155-159.  
38  
39 40 Berben L, Sereika SM, Engberg S: Effect size estimation: methods and examples. *Int J Nurs Stud*  
41 2012, **49**:1039-1047.  
42  
43 43 Cohen J: *Statistical power analysis for the behavioral sciences*. Lawrence Erlbaum Associates;  
44 1988.  
45  
46 40 Polit DF, Beck CT: **Nursing Research: principles and methods**. In *Nursing Research: Principle*  
47 *and Methods*. 7 edition. Philadelphia: Lippincott Williams & Wilkins; 2004.  
48  
49 41 Graneheim UH, Lundman B: Qualitative content analysis in nursing research: concepts,  
50 procedures and measures to achieve trustworthiness. *Nurse Educ Today* 2004, **24**:105-112.  
51  
52 42 Babor TF: Avoiding the horrid and beastly sin of drunkenness: does dissuasion make a  
53 difference? *J Consult Clin Psychol* 1994, **62**:1127-1140.  
54  
55 43 Humeniuk R, Ali R, Babor T, Souza-Formigoni ML, de Lacerda RB, Ling W, McRee B, Newcombe  
56 D, Pal H, Poznyak V et al.: A randomized controlled trial of a brief intervention for illicit drugs  
57  
58  
59  
60

1  
2  
3 linked to the Alcohol, Smoking and Substance Involvement Screening Test (ASSIST) in clients  
4 recruited from primary health-care settings in four countries. *Addiction* 2012, **107**:957-966.  
5

6 44 Fachini A, Aliane PP, Martinez EZ, Furtado EF: Efficacy of brief alcohol screening intervention  
7 for college students (BASICS): a meta-analysis of randomized controlled trials. *Subst Abuse*  
8 *Treat Prev Policy* 2012, **7**:40.  
9

10 45 Laure P, Mangin G: Advising parents on physical activity for children between 0 and 5 years. *J*  
11 *Sports Med Phys Fitness* 2011, **51**:467-472.  
12

13 46 O'Cathain A, Murphy E, Nicholl J: Integration and publications as indicators of 'yield' from  
14 mixed methods studies. *Journal of Mixed Methods Research* 2007, **1**:147-163.  
15  
16  
17  
18  
19  
20  
21  
22  
23  
24  
25  
26  
27  
28  
29  
30  
31  
32  
33  
34  
35  
36  
37  
38  
39  
40  
41  
42  
43  
44  
45  
46  
47  
48  
49  
50  
51  
52  
53  
54  
55  
56  
57  
58  
59  
60

1  
2  
3  
4  
5  
6  
7  
8  
9  
10  
11  
12  
13  
14  
15  
16  
17  
18  
19  
20  
21  
22  
23  
24  
25  
26  
27  
28  
29  
30  
31  
32  
33  
34  
35  
36  
37  
38  
39  
40  
41  
42  
43  
44  
45  
46  
47  
48  
49  
50  
51  
52  
53  
54  
55  
56  
57  
58  
59  
60

Figure 1. Development of a complex intervention based on the MRC framework and its evaluation using an embedded experimental design.

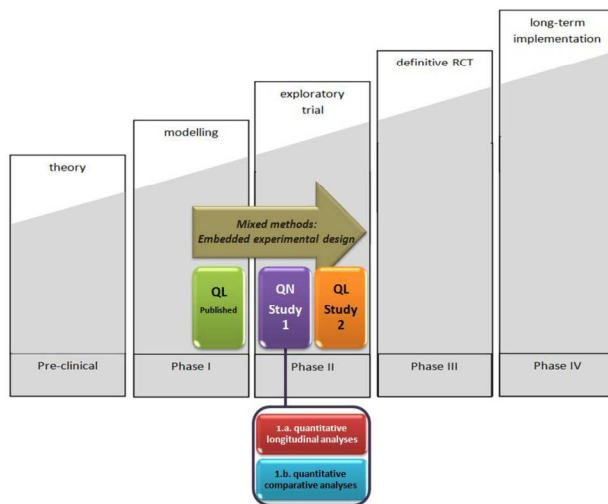

Legend: RCT, randomised controlled trial; QL, qualitative study; QN, quantitative study

.....  
.....  
.....

210x297mm (300 x 300 DPI)

1  
2  
3  
4  
5  
6  
7  
8  
9  
10  
11  
12  
13  
14  
15  
16  
17  
18  
19  
20  
21  
22  
23  
24  
25  
26  
27  
28  
29  
30  
31  
32  
33  
34  
35  
36  
37  
38  
39  
40  
41  
42  
43  
44  
45  
46  
47  
48  
49  
50  
51  
52  
53  
54  
55  
56  
57  
58  
59  
60

Figure 2. Flow chart illustrating the quantitative and qualitative studies used to assess the transition programme for adolescents with JIA. In Study 1, quantitative analyses were conducted based on a one-group pretest-posttest design with a non-equivalent posttest-only comparison group composed of adolescent-parent dyads. This was followed by Study 2, a qualitative study consisting of in-depth interviews.

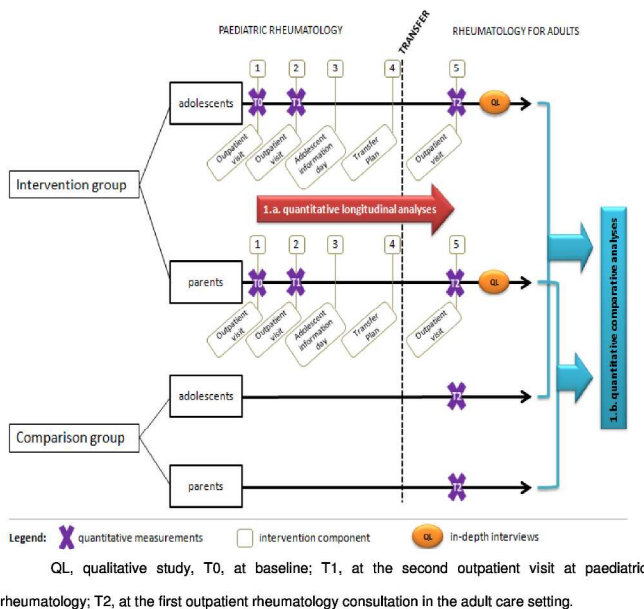

210x297mm (300 x 300 DPI)



**Rationale, design and baseline data of a mixed-methods study examining the clinical impact of a brief transition programme for young people with juvenile idiopathic arthritis: The DON'T RETARD project**

|                                 |                                                                                                                                                                                                                                                                                                                                                                                                                                                                                                                                                                                                                                                                                                                                                                                                                                                                                                                                            |
|---------------------------------|--------------------------------------------------------------------------------------------------------------------------------------------------------------------------------------------------------------------------------------------------------------------------------------------------------------------------------------------------------------------------------------------------------------------------------------------------------------------------------------------------------------------------------------------------------------------------------------------------------------------------------------------------------------------------------------------------------------------------------------------------------------------------------------------------------------------------------------------------------------------------------------------------------------------------------------------|
| Journal:                        | <i>BMJ Open</i>                                                                                                                                                                                                                                                                                                                                                                                                                                                                                                                                                                                                                                                                                                                                                                                                                                                                                                                            |
| Manuscript ID:                  | bmjopen-2013-003591.R1                                                                                                                                                                                                                                                                                                                                                                                                                                                                                                                                                                                                                                                                                                                                                                                                                                                                                                                     |
| Article Type:                   | Research                                                                                                                                                                                                                                                                                                                                                                                                                                                                                                                                                                                                                                                                                                                                                                                                                                                                                                                                   |
| Date Submitted by the Author:   | 14-Oct-2013                                                                                                                                                                                                                                                                                                                                                                                                                                                                                                                                                                                                                                                                                                                                                                                                                                                                                                                                |
| Complete List of Authors:       | Hilderson, Deborah; Department of Paediatrics, University Hospitals Leuven, Belgium, ; Centre for Health Services and Nursing Research, KU Leuven Department of Public Health and Primary Care, Belgium, Westhovens, Rene; Skeletal Biology and Engineering Research Centre, KU Leuven Department of Development and Regeneration; Rheumatology, University Hospitals Leuven, Belgium, Wouters, Carine; Department of Paediatric Rheumatology, University Hospitals Leuven, Belgium, Van der Elst, Kristien; Skeletal Biology and Engineering Research Centre, KU Leuven Department of Development and Regeneration; Rheumatology, University Hospitals Leuven, Belgium, Goossens, Eva; Centre for Health Services and Nursing Research, KU Leuven Department of Public Health and Primary Care, Belgium, Moons, Philip; Centre for Health Services and Nursing Research, KU Leuven Department of Public Health and Primary Care, Belgium, |
| <b>Primary Subject Heading</b>: | Paediatrics                                                                                                                                                                                                                                                                                                                                                                                                                                                                                                                                                                                                                                                                                                                                                                                                                                                                                                                                |
| Secondary Subject Heading:      | Rheumatology, Research methods                                                                                                                                                                                                                                                                                                                                                                                                                                                                                                                                                                                                                                                                                                                                                                                                                                                                                                             |
| Keywords:                       | RHEUMATOLOGY, Paediatric rheumatology < PAEDIATRICALS, PAEDIATRICALS, QUALITATIVE RESEARCH                                                                                                                                                                                                                                                                                                                                                                                                                                                                                                                                                                                                                                                                                                                                                                                                                                                 |
|                                 |                                                                                                                                                                                                                                                                                                                                                                                                                                                                                                                                                                                                                                                                                                                                                                                                                                                                                                                                            |

SCHOLARONE™  
Manuscripts

1  
2  
3 **Rationale, design and baseline data of a mixed-methods study examining the clinical impact of a brief**  
4 **transition programme for young people with juvenile idiopathic arthritis: The DON'T RETARD project**  
5  
6  
7

8 Deborah Hilderson, PhD, RN<sup>1,2</sup>; Rene Westhovens, MD, PhD<sup>3</sup>; Carine Wouters, MD, PhD<sup>4</sup>; Kristien Van der Elst,  
9 MSc, RN<sup>2,3</sup>; Eva Goossens, MSc, RN<sup>2,5</sup>; Philip Moons, PhD, RN<sup>2\*</sup>  
10  
11

12  
13  
14 <sup>1</sup>Department of Paediatrics, University Hospitals Leuven, Belgium

15  
16 <sup>2</sup> Centre for Health Services and Nursing Research, KU Leuven Department of Public Health and Primary Care,  
17 Belgium  
18

19  
20 <sup>3</sup>Skeletal Biology and Engineering Research Centre, KU Leuven Department of Development and Regeneration;  
21 Rheumatology, University Hospitals Leuven, Belgium  
22

23  
24 <sup>4</sup>Department of Paediatric Rheumatology, University Hospitals Leuven, Belgium  
25

26 <sup>5</sup> PhD Fellowship, Research Foundation Flanders, Belgium  
27  
28

29  
30 \*Corresponding author: Philip Moons, Centre for Health Services and Nursing Research, KU Leuven Department  
31 of Public Health and Primary Care, Kapucijnenvoer 35, box 7001, B-3000 Leuven, Belgium; Tel: +32-16-336984;  
32 Fax: +32-16-336970, philip.moons@med.kuleuven.be  
33  
34  
35  
36

37  
38 **Keywords:** brief intervention, complex intervention, mixed methods, adolescents, juvenile idiopathic arthritis,  
39 transition, transfer, study protocol, effect sizes, clinical relevance  
40  
41  
42

43  
44 **Word count:** 5250  
45  
46  
47  
48  
49  
50  
51  
52  
53  
54  
55  
56  
57  
58  
59  
60



**ABSTRACT**

**Objectives:**To describe (1) the content of a transition programme for young people with juvenile idiopathic arthritis (JIA) designed as a brief intervention, (2) the rationale and design of a mixed-methods study evaluating the clinical impact of this transition programme, and (3) to provide baseline data of the intervention group.

**Design:**An 'embedded experimental' design is used for the evaluation of the transition programme. A 'one-group pretest-posttest, with a non-equivalent posttest-only comparison group design', is used to quantitatively evaluate the impact of the transition programme, applying both longitudinal and comparative analyses. Subsequently, experiences of adolescents and their parents who participated in the experimental group will be analysed qualitatively, using content analysis.

**Setting:**Subjects participating in the intervention, are recruited at a tertiary centre in Belgium. The comparison group subjects are recruited from one tertiary and three secondary care centres in Belgium.

**Participants:**The intervention group consist of 33 young people (25 females; 8 males), with a median age of 16 years. Main diagnoses are persistent or extended oligo-articular JIA (33%), poly-articular JIA (30%), enthesitis-related JIA (21%) or systemic arthritis (15%).

**Intervention:**The transition programme comprises 8 key components: (a)transition coordinator; (b)providing information and education; (c)availability by telephone; (d)information about and contact with adult care programme; (e)guidance of parents; (f)meeting with peers; (g)transfer plan; and (h)actual transfer to adult care.

**Primary and secondary outcomes:**The primary outcome is health status, as perceived by the adolescents. Secondary outcomes are health status, as perceived by the parents; medication adherence; illness-related knowledge; quality-of-life; fatigue; promotion of independence; support of autonomy; behavioural control; and psychological control.

**Results:**At baseline, the median score on psychosocial health was 69.2 (Q1=60.0;Q3=92.9) and 68.8 (Q1=56.3;Q3=89.1) on physical health. Rheumatic-specific health scores ranged from 62.5 to 100.0.

**Conclusions:** We present the rationale and design of a study intended to evaluate a transition programme for adolescents with JIA as a brief intervention.

**ARTICLE SUMMARY***Article focus*

- The content of a transition programme for young people with juvenile idiopathic arthritis (JIA), designed as a brief intervention, is described.
- The rationale and design is provided of an innovative mixed-methods approach for studying the clinical impact of a brief transition programme for young people with JIA.

*Key messages*

- The transition programme contains five subsequent steps: (1) an introduction of the transition coordinator at an outpatient visit at paediatric rheumatology; (2) a second face-to-face visit with the transition coordinator, taking place at paediatric rheumatology; (3) an adolescent-information day for the young people and their parents; (4) the development of an individualized transfer plan; and (5) the actual transfer of care to adult rheumatology .
- The transition programme comprises eight key components that are implemented in one or more of the five steps: (a) a transition coordinator; (b) providing information and education about JIA and medication management, health behaviour, dealing with fatigue, school, friends and any problems with medication adherence; (c) availability by telephone; (d) information about and contact with the adult rheumatology programme; (e) guidance of parents; (f) meeting with peers; (g) a transfer plan; and (h) the actual transfer to adult rheumatology programme.

*Strengths and limitations*

- A transition programme for adolescents with JIA is developed as a brief intervention, which may be less costly and time-consuming than the existing, more comprehensive transitional care interventions.
- The development and evaluation of this transition programme is guided by the initial Medical Research Council framework for complex interventions.
- The use of a sequential mixed-methods approach within the framework for complex intervention enables a full and integrative insight into the clinical impact of the key components of the transition programme.

## BACKGROUND

Some decades ago, several paediatric disorders were associated with high, progressive morbidity and increased mortality. For many people suffering from these chronic diseases, medical, surgical, and technological advancements have resulted in improved disease management and increased life expectancy. Unlike in past decades, children with a progressive deteriorating disorder now often live into adulthood managing a chronic disease. Expert lifetime care should be provided for these patients in order to maximise their potential and lifelong functioning.

Young people with chronic conditions undergo different stages during their life. Two of the many important phenomena that occur include a developmental transition into adulthood, a phase during which young people evolve from being a dependent child to becoming an independent adult [1]. Second, their setting of care is transferring from a paediatric context to an adult-focused environment. Indeed, a timely and well-prepared transfer to adult-centred care is advocated [2,3]. This transfer is defined as an event or series of events through which adolescents and young adults with chronic physical and medical conditions move their care from a paediatric to an adult health care environment [4]. According to the recent literature, the paediatric-to-adult transfer of care should be preceded by a preparatory transitional phase. Transition is therefore defined as a process by which adolescents and young adults with chronic childhood illnesses are prepared to take charge of their lives and their health in adulthood [4].

In order to prepare young people to take on new responsibilities for their health and to anticipate the imminent transfer to adult care, transition programmes have been developed. The efficacy of these transition programmes has been evaluated to some extent in the last decade [5-11]. Using quasi-experimental designs, investigators have found some positive effects on quality of life [8], disease outcomes [5,7], number of admissions and the length of stay of readmissions [7], knowledge [8], work experience and career advice [8], and satisfaction with care [10]. The vast majority of the studies have been conducted in the United Kingdom [12], which may limit the generalizability of study findings to other health care systems due to e.g. differences in financing and reimbursement of health care expenditures. Therefore, research on the efficacy of transition programmes in other countries is warranted [12].

Existing transition programmes generally adopt a comprehensive approach, likely contributing to their positive effects. However, such extensive programmes are also perceived as being costly and time-consuming

1  
2  
3 to implement in day-to-day practice, although economic cost-effectiveness studies are currently lacking. This is  
4  
5 illustrated by the finding that the most frequently reported barriers to the formal transition of patients are  
6  
7 limited time and lack of funding for a transition coordinator [13,14]. Hence, the cost-effectiveness of transition  
8  
9 programmes can be questioned. In times of economic crisis and limited funding, more sustainable alternatives  
10  
11 must be explored. Brief evidence-based interventions have the potential to be cost-effective and therefore, are  
12  
13 more likely to become implemented in clinical practice.

14  
15 Transition programmes can be viewed as complex interventions. Complex interventions are built up  
16  
17 from a number of components that may act both independently and interdependently [15]. This implies that  
18  
19 the active ingredient of the intervention is unknown or difficult to specify. The British Medical Research Council  
20  
21 (MRC) has provided a framework for developing and evaluating complex interventions. It entails a recursive  
22  
23 process of development, feasibility and pilot testing, evaluation, and implementation of the complex  
24  
25 intervention. Hence, before any formal efficacy assessment can be done, comprehensive preparatory work is  
26  
27 conducted [15].

28  
29 The original model of the MRC comprised an investigative sequence of five phases (Figure 1). First,  
30  
31 theory and evidence are assessed in order to provisionally identify the steps and the key components of the  
32  
33 intervention; this is termed the preclinical phase. Second, an understanding of the intervention and its possible  
34  
35 effects is developed; this is termed phase I: modelling phase. Third, the feasibility of key components is  
36  
37 assessed, and recruitment procedures and measurement of outcomes are tested; this is termed phase II:  
38  
39 exploratory trial phase. Fourth, randomised controlled trials are conducted to evaluate the impact of the  
40  
41 complex intervention. These trials require adequate power, adequate randomisation, appropriate outcome  
42  
43 measures, and other standard features of well-designed trials; this is termed phase III: definitive randomised  
44  
45 controlled trial. Finally, separate studies are conducted to establish the long-term and real-life effectiveness of  
46  
47 the intervention; this is termed phase IV: long-term implementation [15,16].

48  
49 \*\*\* INSERT FIGURE 1 ABOUT HERE\*\*\*

50  
51  
52 In order to develop and test a transition programme involving a complex and brief intervention, we  
53  
54 established the DON'T RETARD project (**D**evices for the **O**ptimizati**O**N of **T**RansfEr and **T**ransition of **A**dolescents  
55  
56 with **R**heumatic **D**isorders). This project was designed for young people with JIA  
57  
58 (<http://www.kuleuven.be/switch2/rheuma.html>) and aimed to provide a proof of concept for a transition  
59  
60

1  
2  
3 programme devised as a brief intervention. We followed the original MRC framework for complex  
4  
5 interventions. As part of the modelling phase, we conducted some preparatory studies that were previously  
6  
7 published elsewhere [14,17]. The next step in the DON'T RETARD project is to evaluate the newly developed  
8  
9 transition programme.

10  
11 In the present article, we aim (1) to extensively describe the content of a transition programme for  
12  
13 young people with JIA that was designed as a brief intervention, (2) to describe the rationale and design of a  
14  
15 mixed methods study evaluating the clinical impact of this transition programme, and (3) to report the baseline  
16  
17 characteristics of the intervention group on the respective primary and secondary outcomes. We hypothesize  
18  
19 that the transition programme would improve the physical, psychosocial, and rheumatic-specific health of  
20  
21 adolescents with JIA (primary outcome) [8,18]. Second, we hypothesize that the programme would improve  
22  
23 medication adherence, illness-related knowledge, quality of life, threshold to fatigue, and parenting styles in  
24  
25 patients who participate in the programme (secondary outcomes). To guarantee transparency and quality of  
26  
27 describing this complex intervention, we used the recently published criteria for reporting the development  
28  
29 and evaluation of complex interventions (CReDECI) [19]. The results on the clinical impact of the transition  
30  
31 programme will be reported in a forthcoming publication.

### 32 33 34 **Transition programme as a brief intervention**

35  
36  
37 Our transition programme, which is designed to be a brief intervention, contains five steps. We will  
38  
39 describe each step in the next section.

#### 40 41 *Intervention steps*

42  
43  
44 **(1)** The first step occurs during a scheduled outpatient visit. The paediatric rheumatologist introduces  
45  
46 the transition coordinator (TC) to the patient (aged 14-16 years) and his or her parents, and explains the  
47  
48 transition programme. During this first face-to-face visit with the TC, the TC provides the patient and parents  
49  
50 with a rheumatology management diary (i.e., a booklet including self-reporting symptoms scales, an overview  
51  
52 of scheduled appointments, space for writing down questions, etc.), written information about JIA and  
53  
54 medication management, and a DVD with instructions regarding appropriate exercising. The TC guides the  
55  
56 young person and parent(s) through three patient information websites and presents a video about JIA and its  
57  
58 consequences. Young people have the possibility to see both the rheumatologist and TC without the presence  
59  
60

1  
2  
3 of their parent(s). This independent visit is strongly encouraged. Furthermore, a second face-to-face visit with  
4 the TC is scheduled. The initial contact session lasts about 30-40 minutes. The TC is however continuously  
5 available by telephone to answer additional questions about the condition, therapy, transition process, health  
6 behaviour, and clinic appointments.  
7  
8  
9

10  
11 **(2)** The second step of the intervention occurs six months later, and consists of a second face-to-face  
12 visit with the TC, taking place at the paediatric outpatient clinic. During this visit, the TC discussed health  
13 behaviour, dealing with fatigue, school, friends, self-image, knowledge about the disease, and any difficulties  
14 with medication adherence. Participants receive a folder about the practical issues related to the adult  
15 rheumatology programme (e.g., contact information for the secretary and rheumatologists, organisational  
16 information for the outpatient clinic). This session lasts approximately 30 minutes.  
17  
18  
19  
20  
21  
22

23  
24 **(3)** For the third step of the intervention, patients and their parents are invited to attend an  
25 adolescent information day. On this day, all patients who attended their second visit with the TC are invited to  
26 come together. The adolescent information day has two parallel programmes: one for the adolescents and one  
27 for the parents. The programme for adolescents begins with a brief introduction from the TC and the paediatric  
28 rheumatologist. Then the adolescents take part in a variety of activities: they meet with peers, take an  
29 orientation tour at the adult care facilities, meet with the rheumatologists, physiotherapist(s) and nurse  
30 specialist of the adult rheumatology team, and attend a workshop on psychological issues. These activities are  
31 followed by a cooking workshop, in which the adolescents prepare a complete meal for themselves and their  
32 parents. This allows them to talk with their peers in an informal setting.  
33  
34  
35  
36  
37  
38  
39  
40

41  
42 The parallel programme for parents during this third step of the intervention is similar. A parent  
43 association representative is available so that the parents can express their concerns about their child's  
44 transition to adulthood. Activities include taking an orientation tour at the adult care facilities, meeting with  
45 the rheumatologists and nurse specialist of the adult rheumatology team, and attending a lecture on  
46 psychological issues inherent to the development of an adolescent with chronic disorders. After the formal  
47 programme, parents join their children for the dinner prepared by the children. The adolescent information day  
48 starts at 2PM and ends at 6.30PM, and takes place twice during the transition programme. For each  
49 information day, about 15 patient-parents dyads participate.  
50  
51  
52  
53  
54  
55  
56  
57  
58  
59  
60

1  
2  
3 (4) For the fourth step, an individualized transfer plan is developed by the TC based on conversations  
4 with the young person and the parents. This plan is developed before transferring the patient from paediatric  
5 to adult rheumatology. This plan is based on the coding structure of the International Classification of  
6 Functioning, Disability and Health for Children and Youth (ICF-CY). By shifting the focus from cause to impact,  
7 the ICF-CY puts all health conditions on an equal footing, allowing them to be compared using a common  
8 metric. Furthermore, it takes into account the social aspects of a disability and does not view disability only as a  
9 'medical' or 'biological' dysfunction. By including contextual factors, in which environmental factors are listed,  
10 the ICF-CY allows us to record the impact of an environment on a person's functioning. The transfer plan also is  
11 based on patient information collected by the paediatric rheumatologist, the TC, and other health care  
12 professionals that are consulted. The development of a transfer plan requires 30 minutes per patient.  
13  
14  
15  
16  
17  
18  
19  
20  
21  
22

23 (5) The fifth step is the actual transfer. Once the transfer plan is handed over to the adult  
24 rheumatologist, the patient is considered transferred to adult rheumatology care. The third face-to-face visit  
25 with the TC occurs during the patient's first outpatient visit to adult rheumatology care. This time, the  
26 rheumatologist of the adult rheumatology programme joins the session, along with the TC, patient, and  
27 parents. The TC focuses on health behaviour and medication information. During this outpatient visit, the  
28 patient is formally 'handed over' to the adult rheumatology providers. This session lasts about 20 minutes.  
29  
30  
31  
32  
33  
34

#### 35 *Intervention key components*

36  
37  
38 The transition programme comprises 8 key components that are implemented in one or more of the  
39 five steps: (a) a transition coordinator; (b) providing information and education about JIA and medication  
40 management, health behaviour, dealing with fatigue, school, friends and any problems with medication  
41 adherence; (c) availability by telephone; (d) information about and contact with the adult rheumatology  
42 programme; (e) guidance of parents; (f) meeting with peers; (g) a transfer plan; and (h) the actual transfer to  
43 adult rheumatology programme.  
44  
45  
46  
47  
48  
49

50 Altogether, the TC spends 60 to 90 minutes per patient, spread over a period of 1.5 years. This is in  
51 addition to the 40 man-hours (for the TC, paediatric rheumatologists, rheumatologists of the adult setting,  
52 physiotherapists, nurses of adult rheumatology, psychologists) incurred by the adolescent information day  
53 activities and the 20 hours needed for its preparation. Overall, it was estimated that the time and work  
54  
55  
56  
57  
58  
59  
60

1  
2  
3 investment of one full-time equivalent is needed to implement this brief intervention for a caseload of 250 to  
4  
5 300 transitioning patients.  
6  
7  
8

## 9 10 **METHODS AND DESIGN**

11  
12 To develop and evaluate the transition programme, we apply a mixed-methods approach in which quantitative  
13  
14 and qualitative studies are combined. More specifically, we use an 'embedded experimental design' [20]. This  
15  
16 design is characterised by a set of qualitative studies that are conducted before and after a quantitative study.  
17  
18 In our project, the embedded experimental design start with a qualitative study using in-depth interviews. The  
19  
20 aim of these interviews is to better understand the transitional needs of young people with JIA. The  
21  
22 information obtained in this qualitative study assisted us in developing the transition programme. Hence, this  
23  
24 particular qualitative study corresponds to the modelling phase of the MRC framework (Figure 1, green box).  
25  
26 The methods and results of this first qualitative study are reported in two related articles [21,22]. Therefore,  
27  
28 we do not elaborate on this study in the present article. However, we did not solely rely on our qualitative  
29  
30 findings to determine the content of the transition programme. Indeed, we built upon previously published  
31  
32 studies on transitional care. [8,10,21,22,23]  
33

34  
35 Subsequently, we conduct a quasi-experimental study employing a 'one-group pretest-posttest, with a  
36  
37 non-equivalent posttest-only comparison group' design (Figure 1, purple box; Figure 2). In this quantitative  
38  
39 study, we investigate the clinical outcomes of patients with JIA and their parents who participate in the  
40  
41 transition programme. In this respect, longitudinal analyses will be conducted to investigate changes over time  
42  
43 (Figures 1, 2; indicated in red). Furthermore, comparative analyses will be performed by comparing the post-  
44  
45 test scores of the intervention group with those of patients who received usual care (Figures 1, 2; indicated in  
46  
47 blue). This quantitative study is called study 1 in figure 2. After this initial quantitative study, a second  
48  
49 qualitative study using an explanatory design is conducted (study 2; indicated in orange), in which we elaborate  
50  
51 on the experiences of adolescents with JIA and their parents regarding their participation in the transition  
52  
53 programme. Both studies 1 and 2 are considered to correspond to the exploratory trial phase of the MRC  
54  
55 framework (see above, Background section).  
56  
57  
58  
59  
60

\*\*\* INSERT FIGURE 2 HERE \*\*\*



### Study 1.a. Quantitative study: longitudinal analysis

#### *Inclusion criteria*

Potential subjects are recruited during a scheduled visit at the outpatient clinic, between February 1, 2009, and February 1, 2011. Dutch-speaking young people (14-16 years of age) with JIA, treated and in active follow-up at the Department of Paediatric Rheumatology of the University Hospitals Leuven, are invited to participate in the intervention trial. Patients are excluded if they have developmental or cognitive disabilities or if they do not have the physical capacities to complete the questionnaires used in the study. The convenience sample include all eligible subjects.

#### *Informed consent*

Patients are included after obtaining written informed consent from the parents and informed assent from the patients (all patients were minors at the time of inclusion). Anonymity is guaranteed, and patients and parents are assured that they could stop participating at any time.

#### *Variables and measurements*

All subjects are assessed three times: at baseline ( $T_0$ ), at the second outpatient visit at paediatric rheumatology ( $T_1$ ), and at the first outpatient rheumatology consultation in the adult care setting ( $T_2$ ) (Figure 2). At each point in time we measure the primary and secondary outcomes, as well as disease parameters. The primary outcome of interest is the self-perceived health status of the patient, as measured with the Pediatric Quality of Life Inventory (PedsQL™). We use both the generic (PedsQL™ 4.0 Generic Core Scales) and the disease-specific module (PedsQL™ 3.0 Rheumatology Module) [24,25,26].

We measure the following set of secondary outcomes salient to the young people: the patients' health status as perceived by their parents, which is measured with the PedsQL™ 4.0 Generic Core Scales and PedsQL™ 3.0 Rheumatology Module [24,25,26]. Furthermore a set of patients self-reported secondary outcomes are assessed: medication adherence is measured using a Visual Analogue Scale (VAS) and the Swiss

1  
2  
3 HIV Cohort Study Adherence Questionnaire (SHCS-AQ) [27].; illness-related knowledge is measured using the  
4  
5 modified Patient Knowledge Questionnaire (PKQ) [28]; and the level of global quality of life is measured using a  
6  
7 Linear Analogue Scale (LAS) [29]. Fatigue is measured using the Multidimensional Fatigue Inventory (MFI-20)  
8  
9 [30]. Finally in the group of parents, four dimensions of parenting are assessed using parent-reported  
10  
11 instruments. Promotion of independence by parents is measured using the Promotion of Independence Scale  
12  
13 [31] and support of autonomy is measured using the Autonomy Support Scale [32]. Furthermore, the level of  
14  
15 behavioural control (i.e., parental monitoring of child's behaviour) is assessed using the Parental Regulation  
16  
17 Scale [33]; while the aspect of psychological control (i.e., intrusive and manipulative form of controlling) is  
18  
19 measured using the Psychological Control Scale [33]. These outcomes are all found to be suboptimal in patients  
20  
21 with JIA [31,33-35,23]. We hypothesize that participation in the transition programme could improve  
22  
23 medication adherence, illness-related knowledge, quality of life, fatigue, and parenting style.

24  
25 With regard to disease parameters, we evaluate the clinical status of disease activity and clinical  
26  
27 remission on/off medication according to the preliminary criteria of Wallace et al [36]. Furthermore, the  
28  
29 functional status is assessed by the patient- and parent-reported Child Health Assessment Questionnaire  
30  
31 (CHAQ-DI) [37-39]. Detailed information about the instruments used to assess the clinical impact of the  
32  
33 transition programme are shown in Table 1.  
34  
35  
36  
37  
38  
39  
40  
41  
42  
43  
44  
45  
46  
47  
48  
49  
50  
51  
52  
53  
54  
55  
56  
57  
58  
59  
60

Table 1 Overview of variables and measurements in the quantitative study

| Variable                  | Measurement                                                                  | Report    | Items | Validity                                                                  | Reliability                                                                                                                                                                                                                                                                                                                                                                                                                                                                                                                                                           | Responsiveness                            | Interpretation                                                                                                                                     |
|---------------------------|------------------------------------------------------------------------------|-----------|-------|---------------------------------------------------------------------------|-----------------------------------------------------------------------------------------------------------------------------------------------------------------------------------------------------------------------------------------------------------------------------------------------------------------------------------------------------------------------------------------------------------------------------------------------------------------------------------------------------------------------------------------------------------------------|-------------------------------------------|----------------------------------------------------------------------------------------------------------------------------------------------------|
| Perceived health status   | <i>Pediatric Quality of Life Inventory (PedsQL™ 4.0) Generic Core Scale</i>  | PAT & PAR | 23    | construct validity confirmed [24], p. 333-335; [25], p. 809; [26], p. 719 | <ul style="list-style-type: none"> <li>internal consistency confirmed</li> <li>adolescents' self-report: total score, <math>\alpha=0.91-0.92</math>; physical health, <math>\alpha=0.83-0.90</math>; psychosocial health, <math>\alpha=0.87-0.89</math></li> <li>parents' proxy report total score, <math>\alpha=0.92-0.94</math>; physical health, <math>\alpha=0.88</math>; psychosocial health, <math>\alpha=0.89-0.91</math> [24], p. 335; [26], p. 718</li> </ul>                                                                                                | responsiveness confirmed [26], p. 721-722 | <ul style="list-style-type: none"> <li>scores from 0-100</li> <li>higher scores indicate a better perceived health status</li> </ul>               |
|                           | <i>Pediatric Quality of Life Inventory (PedsQL™ 3.0) Rheumatology Module</i> | PAT & PAR | 22    | construct validity confirmed [26], p. 720-721                             | <ul style="list-style-type: none"> <li>internal consistency confirmed</li> <li>adolescents' self-report pain and hurt, <math>\alpha=0.90</math>; daily activities, <math>\alpha=0.84</math>; treatment, <math>\alpha=0.77</math>; worry, <math>\alpha=0.81</math>; communication, <math>\alpha=0.79</math></li> <li>parents' proxy report: pain and hurt, <math>\alpha=0.90</math>; daily activities, <math>\alpha=0.89</math>; treatment, <math>\alpha=0.77</math>; worry, <math>\alpha=0.80</math>; communication, <math>\alpha=0.91</math> [26], p. 718</li> </ul> | responsiveness confirmed                  | <ul style="list-style-type: none"> <li>scores from 0-100</li> <li>higher scores indicate a better perceived rheumatologic health status</li> </ul> |
| Medication adherence      | <i>Visual Analogue Scale (VAS)</i>                                           | PAT       | 1     | NR                                                                        | NR                                                                                                                                                                                                                                                                                                                                                                                                                                                                                                                                                                    | NR                                        | <ul style="list-style-type: none"> <li>scores from 0 to 100</li> <li>higher scores indicate better medication adherence</li> </ul>                 |
|                           | <i>SWISS HIV Cohort Study Adherence Questionnaire SHCS-AQ [27]</i>           | PAT       | 2     | NR                                                                        | NR                                                                                                                                                                                                                                                                                                                                                                                                                                                                                                                                                                    | NR                                        | medication adherent or non-adherent                                                                                                                |
| Illness-related knowledge | <i>The Modified Patient Knowledge Questionnaire (PKQ)</i>                    | PAT       | 16    | content validity confirmed [28]                                           | NR                                                                                                                                                                                                                                                                                                                                                                                                                                                                                                                                                                    | NR                                        | <ul style="list-style-type: none"> <li>scores from 0 to 100</li> <li>higher scores indicate more illness-related knowledge</li> </ul>              |
| Global quality of life    | <i>Linear Analogue Scale (LAS)</i>                                           | PAT       | 1     | content validity confirmed; construct validity confirmed [29], p.410      | stability confirmed (ICC= 0.65; $P < 0.001$ ) [29], p.410                                                                                                                                                                                                                                                                                                                                                                                                                                                                                                             | responsiveness confirmed [29], p.410      | scores from 0 (worst imaginable quality of life) to 100 (best imaginable quality of life)                                                          |
| Fatigue                   | <i>Multidimensional Fatigue Inventory</i>                                    | PAT       | 20    | construct validity                                                        | internal consistency                                                                                                                                                                                                                                                                                                                                                                                                                                                                                                                                                  | responsiveness                            | • scores from 4-20                                                                                                                                 |

|                                                                                                                                |                                                                                |              |    |                                             |                      |                                                                                                                                                                                                                 |                        |                                                                                                           |
|--------------------------------------------------------------------------------------------------------------------------------|--------------------------------------------------------------------------------|--------------|----|---------------------------------------------|----------------------|-----------------------------------------------------------------------------------------------------------------------------------------------------------------------------------------------------------------|------------------------|-----------------------------------------------------------------------------------------------------------|
|                                                                                                                                | (MFI-20)                                                                       |              |    |                                             | confirmed [30], p. 6 | confirmed:<br>general fatigue, $\alpha=0.82$ ;<br>physical fatigue, $\alpha=0.81$ ;<br>reduced activity, $\alpha=0.82$ ;<br>reduced motivation, $\alpha=0.71$ ;<br>mental fatigue, $\alpha=0.86$ [30],<br>p.4-6 | confirmed<br>[30], p.6 | • higher scores indicate a<br>higher degree of fatigue                                                    |
| <b>Parenting dimensions</b>                                                                                                    |                                                                                | PAR          |    |                                             |                      |                                                                                                                                                                                                                 |                        |                                                                                                           |
| <b>a. promotion of independence</b>                                                                                            | <i>Promotion Independence Scale (PI)</i>                                       |              | 8  | NR                                          |                      | internal consistency<br>confirmed ( $\alpha=.76$ ) [31], p.17                                                                                                                                                   | NR                     | • scores from 1 to 5<br>a. higher scores indicate more<br>promotion of independence                       |
| <b>b. support of autonomy</b>                                                                                                  | <i>Autonomy Support Scale (PVF)</i>                                            |              | 7  | NR                                          |                      | internal consistency<br>confirmed ( $\alpha=0.70-0.72$ )<br>[32], p.1420                                                                                                                                        | NR                     | b. higher scores indicate more<br>support of autonomy                                                     |
| <b>c. behavioural control</b>                                                                                                  | <i>Parental Regulation Scale (PRS-YSR<br/>revised to parent self-report)</i>   |              | 16 | construct validity<br>confirmed [33] p. 309 |                      | NR                                                                                                                                                                                                              | NR                     | c. higher scores indicate more<br>behavioural control                                                     |
| <b>d. psychological control</b>                                                                                                | <i>Psychological Control Scale (PCS-YSR<br/>revised to parent self-report)</i> |              | 8  | NR                                          |                      | internal consistency<br>confirmed ( $\alpha=0.69$ )<br>[33], p.545-546                                                                                                                                          | NR                     | d. higher scores indicate more<br>psychological control                                                   |
| <b>Absence of disease activity</b>                                                                                             | [36]                                                                           | MD           | NA | NA                                          | NA                   | NA                                                                                                                                                                                                              | NA                     | inactive disease or active<br>disease                                                                     |
| <b>Two types of clinical remission:</b><br>(a) Clinical remission on<br>medication<br>(b) Clinical remission off<br>medication | [36]                                                                           | MD           | NA | NA                                          | NA                   | NA                                                                                                                                                                                                              | NA                     | no clinical remission,<br>clinical remission on<br>medication, or<br>clinical remission off<br>medication |
| <b>Functional status</b>                                                                                                       | <i>Childhood Health Assessment<br/>Questionnaire (CHAQ-DI)</i> [37,38]         | PAT &<br>PAR | 30 | construct validity<br>confirmed [39] p. 980 | NR                   |                                                                                                                                                                                                                 | NR                     | scores from 0 (good functional<br>status) to 3 (poor functional<br>status)                                |

Legend: ICC, intra-class correlation; MD, medical doctor; NA, not applicable; NR, not reported; PAT, patient; PAR, parent.

### **Data analysis**

Since this study is an exploratory trial formulated according to the MRC framework of complex interventions, our aim is not to test the efficacy of the transition programme; rather it is a 'proof of concept' for the transition programme as a brief intervention. Therefore, we will not look for statistical significances but rather for clinical differences. Differences in patient- and parent-related outcomes, which are measured continuously starting at  $T_0$  (before intervention) to  $T_2$  (after intervention), will be expressed as effect sizes.

For continuous variables, an effect size for the Wilcoxon test will be calculated by using  $r = Z/\sqrt{n}$ , where  $Z$  is the normal approximation of the Wilcoxon test statistic. To appraise the magnitude of the effect sizes, we will use Cohen's  $r$ . An effect size of 0.1 to 0.3 is considered to be small, whereas effects sizes of 0.3 to 0.5 and  $\geq 0.5$  are considered to be medium and large, respectively [40].

Adherence will be dichotomised as adherent or non-adherent. For this outcome, odds ratios will be calculated to report the effect size. The odds ratio is the ratio of the odds of an outcome (e.g., being adherent) of one group ( $T_0$ , before intervention), to the odds of the outcome of the other group ( $T_2$ , after intervention). To appraise the magnitude of this odds ratio, we will use the following suggested cut-off values: 1.5 to 2.5 is a small effect; 2.5 to 4.3 is a medium effect; and 4.3 or higher is a large effect [41,42].

Nominal data will be expressed in frequencies and percentages. Medians and quartiles (Q1-Q3) will be calculated for continuous, non-normally distributed variables.

### **Baseline data**

The intervention group consist of 33 young people, 25 of which are female and 8 male. Detailed information about JIA subtype, prescribed medication and remission status (on or off therapy) and the outcome data is shown in Table 2. At baseline, patients reported a median score on psychosocial health of 69.2 (Q1=60.0;Q3=92.9) and 68.8 (Q1=56.3;Q3=89.1) on physical health (PedsQoL). For rheumatic-specific health (PedsQoL), median scores ranged between 62.5 and 100, with worst scores for pain and hurt, and best scores for daily activities (PedsQoL). Furthermore, patients reported a median score for functional status (CHAQ-DI) of 0.3 (Q1=0.1;Q3=0.6) and 73.0 (68.5;90.0) on quality of life (LAS). Regarding fatigue, the scores on the motivation subscale was worst (7.0).

\*\*\* INSERT TABLE 2 HERE \*\*\*

Table 2. Demographic, clinical characteristics and baseline outcome data of young people with JIA included in the intervention group (n = 33)

| Baseline data                                                                          |                    |
|----------------------------------------------------------------------------------------|--------------------|
| <b>Sex n(%)</b>                                                                        |                    |
| female                                                                                 | 25 (75.8)          |
| male                                                                                   | 8 (24.2)           |
| <b>Subtype of JIA based on preliminary criteria of Wallace (2004) n(%)</b>             |                    |
| persistent/extended oligo-articular JIA                                                | 11 (33.3)          |
| Poly-articular JIA (RF-, RF+)                                                          | 10 (30.3)          |
| systemic arthritis                                                                     | 5 (15.1)           |
| enthesitis-related arthritis                                                           | 7 (21.2)           |
| <b>Age median, in years (Q<sub>1</sub>;Q<sub>3</sub>)</b>                              | 16 (15.2;17.1)     |
| <b>Presence of JIA disease activity n(%)</b>                                           | 10 (30.3)          |
| <b>Functional status (CHAQ-DI patient-report) median (Q<sub>1</sub>;Q<sub>3</sub>)</b> | 0.3 (0.1;0.6)      |
| <b>Presence of clinical remission on therapy n(%)</b>                                  | 17 (51.5)          |
| <b>Presence of clinical remission off therapy n(%)</b>                                 | 5 (15.2)           |
| <b>Prescribed medication n (%)</b>                                                     |                    |
| NSAIDS                                                                                 | 14 (60.9)          |
| DMARDS                                                                                 | 10 (43.5)          |
| biologicals                                                                            | 6 (26.0)           |
| glucocorticoids                                                                        | 4 (17.4)           |
| <b>Primary outcomes in young people median (Q<sub>1</sub>;Q<sub>3</sub>)</b>           |                    |
| <b>Perceived health status (PedsQL™ 4.0 Generic Core Scale)</b>                        |                    |
| psychosocial health                                                                    | 69.2 (60.0;92.9)   |
| physical health                                                                        | 68.8 (56.3;89.1)   |
| <b>Perceived health status (PedsQL™ 3.0 Rheumatology Module)</b>                       |                    |
| treatment                                                                              | 76.8 (71.4;100)    |
| communication                                                                          | 75.0 (66.7;91.7)   |
| pain and hurt                                                                          | 62.5 (50;93.8)     |
| daily activities                                                                       | 100.0 (91.3;100.0) |
| worry                                                                                  | 75.0 (66.7;91.7)   |

|                                                                                 |                    |
|---------------------------------------------------------------------------------|--------------------|
| <b>Secondary outcomes in young people median (Q<sub>1</sub>;Q<sub>3</sub>)</b>  |                    |
| Global quality of life (LAS)                                                    | 73.0 (68.5;90.0)   |
| Illness-related knowledge (PKQ)                                                 | 31.3 (18.8;43.8)   |
| <b>Fatigue (MFI-20) median (Q<sub>1</sub>;Q<sub>3</sub>)</b>                    |                    |
| motivation                                                                      | 7.0 (5.3;9.0)      |
| mental fatigue                                                                  | 9.5 (7.0;12.8)     |
| activity                                                                        | 9.5 (7.0;12.0)     |
| physical fatigue                                                                | 9.5 (6.3;13.8)     |
| general fatigue                                                                 | 9.5 (7.3;13.0)     |
| Presence of medication adherence (SHCS-AQ)                                      | 23 (69.7%)         |
| <b>Secondary outcomes in parents median (Q<sub>1</sub>;Q<sub>3</sub>)</b>       |                    |
| <b>Dimensions of parenting style median (Q<sub>1</sub>;Q<sub>3</sub>)</b>       |                    |
| autonomy support (PVF)                                                          | 3.8 (3.3;4.3)      |
| promotion of independence (PI)                                                  | 3.4 (3.1;1.8)      |
| behavioural control (PRS-YSR revised to parent self-report)                     | 4.0 (3.6;4.3)      |
| psychological control (PCS-YSR revised to parent self-report)                   | 2.0 (1.8;2.5)      |
| <b>Perceived health status (PedsQL™ 4.0 Generic Core Scale, parent report)</b>  |                    |
| psychosocial health                                                             | 85.0 (71.7;90.0)   |
| physical health                                                                 | 73.0 (56.3;96.9)   |
| <b>Perceived health status (PedsQL™ 3.0 Rheumatology Module, parent report)</b> |                    |
| treatment                                                                       | 89.3 (71.4;97.3)   |
| communication                                                                   | 75.0 (64.6;91.7)   |
| pain and hurt                                                                   | 84.4 (50.0;95.3)   |
| daily activities                                                                | 100.0 (90.0;100.0) |
| worry                                                                           | 91.7 (66.7;100.0)  |

### **Ethical issues**

The Institutional Review Board of the University Hospitals Leuven, Belgium, evaluated and approved the study protocol (B32220096363). This study is performed with ethical standards as described in the latest Declaration of Helsinki.

### **Study 1.b. Quantitative study: comparative analysis**

***Inclusion criteria***

The intervention group's subject inclusion criteria are described above. The comparison group consist of 45 young people aged 17-23 years and their parents. These patients already have been transferred to the adult rheumatology programme without participating in a specific self-management/transition programme (i.e., they received the usual care). The comparison group subjects were recruited from four different health centres in Belgium. Patients who have developmental or cognitive disabilities or do not have the physical capacities to complete the questionnaires are excluded. Subjects of the comparison group (n=23) are included in the analyses if they can be matched with an intervention group subject in terms of disease activity, medication prescribed, JIA subtype, and gender.

***Definition of usual care***

For the purposes of this study, usual care is defined as the care that is currently provided in day-to-day clinical practice. Young people with JIA are usually followed up at the paediatric rheumatology programme until the age of 16 years. Around that age, the adolescent might have a first outpatient visit with the adult rheumatologist and the paediatric rheumatologist together. When the rheumatologists, the patient, and his or her parents agree that the patient is ready for transfer, an appointment for an adult rheumatology consultation is made. No transition coordinator or formal transition plan is provided to patients who receive usual care.

***Informed consent from comparison group subjects***

We use the same procedure described above that we use for the intervention group; the young people above 18 years of age provide their own written informed consent.

***Variables and measurements***

The variables and measurements used in these comparative analyses are the same as those used in the longitudinal analyses (see above). The measures for the comparison group are acquired during one of the scheduled outpatient visits at the adult care clinic (T<sub>2</sub>) (see Figure 2).



### ***Data analysis***

As with the longitudinal analyses, we are interested in clinical differences instead of statistical differences. In the comparative analyses, the scores of the intervention and comparison groups at T<sub>2</sub> will be compared. The cut-off values used for the longitudinal analyses also will be used for the comparative analyses.

### ***Ethical Issues***

The Institutional Review Board of the University Hospitals Leuven, Belgium, evaluated and approved the study protocol (B32220096363). This study is performed with ethical standards as described in the latest Declaration of Helsinki.

## **Study 2. Qualitative study**

### ***Design***

We use an explanatory design to expand the quantitative results with qualitative data [20]. To gain insight into the processes underpinning the transition programme, we conduct in-depth interviews with the young people and parents of the intervention group. The specific aims of this qualitative study are (i) to get an understanding of the reasons why particular effects are observed, and (ii) to evaluate the feasibility and the utility of the key components of the complex intervention from the patients' and parents' perspective.

### ***Inclusion criteria***

Those participating in the intervention group of this qualitative study (young people and their parents) are purposively sampled and invited to take part in the interviews. Sampling continues until no new themes emerge from the data (i.e., until data saturation is reached).

### ***Informed consent***

1  
2  
3 Subjects are included in the qualitative study after we obtained written informed consent for this particular  
4 study. If the patient is a minor, informed consent is obtained from the parents and informed assent from the  
5 patient. Anonymity is guaranteed, and patients and parents are assured that they can stop the interview at any  
6 time.  
7  
8  
9

### 10 11 12 13 **Data collection**

14  
15 We employ a predefined interview guide, previously adjusted by an expert panel consisting of one  
16 rheumatologist (RW), one paediatric rheumatologist (CW), and three researchers (KV, PM, DH) in the field of  
17 care transition. We ask young people and parents to answer open-ended questions about the TC, the  
18 adolescent information day, the time of transfer, and general experiences about the transition programme  
19 intervention.  
20  
21  
22  
23  
24

25  
26 Young people and parents are interviewed at home, each in a different room. Different strategies are  
27 used to assess the trustworthiness of the research: investigator triangulation, bracketing, and building a  
28 relationship of trust with the subject. Investigator triangulation requires that more than one investigator collect  
29 and analyse the raw data, so that the findings emerge through a consensus of a team of investigators [43].  
30 Bracketing is the process of identifying and holding in abeyance preconceived beliefs and opinions about the  
31 phenomenon under study [43]. Bracketing makes the researcher aware of his or her beliefs and opinions about  
32 the phenomenon under study. To build a trusting relationship with each subject, we make certain that the  
33 interviewers are not part of the therapeutic team and that the interviews take place in a room where the  
34 subject feels comfortable. These methods ensure that researcher-related bias is minimised.  
35  
36  
37  
38  
39  
40  
41  
42  
43  
44  
45  
46

### 47 **Data analysis**

48  
49 The interviews will be analysed by using qualitative content analysis, according to the method of Graneheim  
50 and Lundman [44]. Each interview is audio-taped and transcribed verbatim. The interviews will be read through  
51 several times to obtain a good understanding of the content. The first step in the analysis is the identification of  
52 meaning units (i.e., constellations of words or statements that are related to the same central meaning). The  
53 meaning units are labelled with codes, which allows the data to be considered in new and different ways. The  
54  
55  
56  
57  
58  
59  
60

1  
2  
3 second step in the analysis involve sorting the codes into themes. A theme is an expression of the latent  
4 content of the text. For each theme, its content is expressed in two categories. To ensure the trustworthiness  
5 of the analysis, the authors discuss the classification of codes, categories, and themes until consensus is  
6 reached.  
7  
8  
9

### 10 11 12 13 ***Ethical Issues***

14  
15  
16 The Institutional Review Board of the University Hospitals Leuven, Belgium, evaluated and approved the study  
17 protocol. This study is performed with ethical standards as described in the latest Declaration of Helsinki.  
18  
19

### 20 21 22 **DISCUSSION**

23  
24 Previous studies have shown that the implementation of a comprehensive transition programme can have  
25 positive effects on several patient outcomes. We developed a transition programme for young people with JIA  
26 as a brief intervention. Implementation of these transition programmes in clinical practice may be more  
27 feasible, because we estimated that one full-time equivalent of manpower of the entire team could take on a  
28 case load of 250 to 300 transitioning patients in this transition programme. In the present article, we describe  
29 the rationale and the design of a mixed-methods approach for evaluating the clinical impact of the transition  
30 programme for young people with JIA, and provide baseline data.  
31  
32  
33  
34  
35  
36  
37  
38

39 Our study is innovative in four aspects. First, to the best of our knowledge, this is the first evaluation of  
40 a transition programme structured as a brief intervention. Brief interventions are usually conducted in a one-  
41 on-one situation and take shorter periods of time [45]. Brief interventions are predominantly used in the  
42 prevention and treatment of substance abuse [46], although they have been employed in other settings as well  
43 [47,48]. Shorter time-consuming interventions are in demand, since the current trend is to implement  
44 transition programmes through optimal time use and cost-efficacy. However, as pointed out by McDonagh and  
45 colleagues, training of healthcare professionals will require additional resources [49].  
46  
47  
48  
49  
50  
51  
52

53 Second, we designed this brief intervention as a complex intervention and used the MRC framework to  
54 perform our evaluation. It is argued that even simple interventions can be complex undertakings, mixing  
55 elements of content, intensity, duration, and setting [45]. Therefore, clearly specifying the steps and  
56  
57  
58  
59  
60

1  
2  
3 components of a brief intervention is needed. For this purpose, we used the criteria for the development and  
4  
5 evaluation of complex interventions (CRedeCI) in health care [19].  
6

7 Third, within this complex intervention framework, we employ a sequential mixed-methods approach,  
8  
9 more specifically an embedded experimental design. This mixed-methods approach enable us to gain better  
10  
11 insight into the clinical impact of the key components of this complex intervention. Using this approach, we  
12  
13 integrate the findings of our different studies.  
14

15 Mixed-methods studies differ from multi-methods studies in that the latter involve a set of mono-  
16  
17 method studies that use different designs and that are conducted independently. Although integration is highly  
18  
19 advocated, it is seldom done. The reason can be explained in two ways [50]. First, researchers do not always  
20  
21 make use of the various ways of integrating findings in their reports. They report the results of qualitative and  
22  
23 quantitative components separately, or they report the qualitative and quantitative findings together without  
24  
25 considering how they are related to each other. This indicates that researchers may be unaware of some of the  
26  
27 unique insights available in mixed-methods studies. In our study, we looked for convergence, divergence, and  
28  
29 discrepancy in the findings of both methods. This process is defined as crystallisation [50]. Indeed,  
30  
31 crystallisation of results and exploration of definite discrepancies can lead to further insights. Second, the  
32  
33 integration of data and findings from different components of a mixed-methods study is not always apparent in  
34  
35 the articles emerging from them. This indicates that any unique insights available from mixed-methods studies  
36  
37 may not be disseminated in ways that are attributable to mixed-methods studies.  
38

39 Lastly, the results of the quantitative longitudinal and comparative studies, and the qualitative studies  
40  
41 will be separately published, and will provide pilot data on the feasibility and impact of a brief transition  
42  
43 programme on patient- and parent-reported outcomes in young people with JIA. The data of this forthcoming  
44  
45 study can be used to design a randomised controlled trial testing the effectiveness of the programme in a  
46  
47 robust way. Indeed, the effect size obtained in the present study can be used for power and sample size  
48  
49 calculations for future studies. Admittedly, since the present study is conducted in persons with JIA, the data  
50  
51 are not necessarily generalizable to other patient populations.  
52

53 Although we use an innovative embedded experimental design in the DON'T RETARD project, some  
54  
55 limitations should be addressed. The assessment of the patient's transition readiness is no key component of  
56  
57 our transition programme. Recently, an increasing number of studies investigated the use of assessment tools  
58  
59  
60

1  
2  
3 such as the Transition Readiness Assessment Questionnaire (TRAQ) [51], an instrument aiming to evaluate a set  
4  
5 of skills and developmental tasks that should be fulfilled in order to transfer patients to adult care.  
6

7 Furthermore, our brief transition programme might look more as a transfer than a transition  
8  
9 programme. The concept of a transition programme may imply more transitional care, starting in early  
10  
11 adolescence, whereas this brief intervention starts in the pre-transfer period. Our brief intervention  
12  
13 predominantly focuses on counselling and education, rather than skills training. Still, expecting all education  
14  
15 needs to be met in the relatively short programme described is ambitious. Moreover, regular assessments of  
16  
17 education needs should already be initiated in paediatric care.

18  
19 In addition, we have to bear in mind that the list of outcomes we use to assess the clinical impact of  
20  
21 our programme is non-exhaustive. Additional outcomes such as self-efficacy or the level of autonomy of  
22  
23 patients might be of interest [52].

24  
25 Finally, since patients who were included in the comparison group are already transferred to adult  
26  
27 rheumatology, they are older as compared to the intervention group. In addition, transfer of patients occurred  
28  
29 in general somewhat later in the era before our transition programme. This also contributes to the higher age  
30  
31 of the comparison subjects. Hence, a matching procedure on age is not possible.  
32  
33  
34

## 35 **CONCLUSION**

36  
37 This methods paper presented the rationale and design of a study intended to evaluate a transition  
38  
39 programme for young people with JIA as a brief intervention. Here, we used the Medical Research Council  
40  
41 framework. The embedded experimental design offers the opportunity to obtain an overall picture of the  
42  
43 clinical impact of the transition programme on young people with JIA. Furthermore, it also allows to get an  
44  
45 overall picture of how these young people experience this programme. This study protocol is designed to  
46  
47 evaluate our brief intervention. This evaluation enable us to get more insight into the active components of our  
48  
49 transition programme. Examination of key clinical and methodological uncertainties in the exploratory trial  
50  
51 phase could help researchers to set up definite randomised controlled trials and guide long-term  
52  
53 implementation.  
54  
55  
56  
57

## 58 **TRIAL STATUS**

1  
2  
3 The trial started February 1, 2009, and ended on February 1, 2011.  
4  
5  
6  
7

#### 8 **ABBREVIATIONS**

9

|    |         |                                                                                |
|----|---------|--------------------------------------------------------------------------------|
| 10 | CHAQ-DI | Childhood Health Assessment Questionnaire                                      |
| 11 |         |                                                                                |
| 12 | CReDECI | Criteria for Reporting the Development and Evaluation of Complex Interventions |
| 13 |         |                                                                                |
| 14 |         |                                                                                |
| 15 | ICC     | Intra-class correlation                                                        |
| 16 |         |                                                                                |
| 17 | ICF     | International Classification of Functioning                                    |
| 18 |         |                                                                                |
| 19 |         |                                                                                |
| 20 | JIA     | juvenile idiopathic arthritis                                                  |
| 21 |         |                                                                                |
| 22 | LAS     | linear analogue scale                                                          |
| 23 |         |                                                                                |
| 24 |         |                                                                                |
| 25 | MD      | medical doctor                                                                 |
| 26 |         |                                                                                |
| 27 | MRC     | Medical Research Council                                                       |
| 28 |         |                                                                                |
| 29 |         |                                                                                |
| 30 | MFI-20  | Multidimensional Fatigue Index                                                 |
| 31 |         |                                                                                |
| 32 | NA      | not applicable                                                                 |
| 33 |         |                                                                                |
| 34 |         |                                                                                |
| 35 | NR      | not reported                                                                   |
| 36 |         |                                                                                |
| 37 | PAT     | patient                                                                        |
| 38 |         |                                                                                |
| 39 |         |                                                                                |
| 40 | PAR     | parent                                                                         |
| 41 |         |                                                                                |
| 42 | PCS-YSR | Psychological Control Scale – Youth Self Report                                |
| 43 |         |                                                                                |
| 44 | PedsQL  | Paediatric Quality of Life Inventory                                           |
| 45 |         |                                                                                |
| 46 |         |                                                                                |
| 47 | PI      | Promotion Independence Scale                                                   |
| 48 |         |                                                                                |
| 49 |         |                                                                                |
| 50 | PKQ     | Patient Knowledge Questionnaire                                                |
| 51 |         |                                                                                |
| 52 | PRS-YSR | Parental Regulation Scale                                                      |
| 53 |         |                                                                                |
| 54 |         |                                                                                |
| 55 | PVF     | Autonomy Support Scale                                                         |
| 56 |         |                                                                                |
| 57 | SHCS-AQ | Swiss HIV Cohort Study Adherence Questionnaire                                 |
| 58 |         |                                                                                |
| 59 |         |                                                                                |
| 60 |         |                                                                                |

1  
2  
3 TC transition coordinator  
4

5 VAS visual analogue scale  
6  
7  
8  
9

#### 10 **AUTHORS CONTRIBUTIONS**

11  
12 PM, RW, CW, and DH were responsible for the concept and design of the study, and analysis and interpretation  
13 of the data. DH and KV collected the data. DH drafted the manuscript. PM, KV, EG, RW, and CW critically  
14 revised the manuscript for important intellectual content. All authors read and approved the final manuscript.  
15  
16  
17  
18  
19

#### 20 **ACKNOWLEDGMENTS**

21  
22 This study was supported by a scientific grant from the King Baudouin Foundation; Fonds voor  
23 Wetenschappelijk Reuma Onderzoek (Fund for Scientific Rheumatism Research); and Clinical Research Fund of  
24 the University Hospitals Leuven, Belgium. These funding sources had no involvement in the collection, analysis,  
25 and interpretation of data. The authors thank all subjects who took part in and supported this study and this  
26 paper: the patients, parents, and rheumatology health care providers of both paediatric and adult  
27 rheumatology of the four participating centres/private practices. We also thank the administrative staff of the  
28 Department of Rheumatology of Ghent, the administrative staff of the Department of Musculoskeletal  
29 Sciences, and the administrative staff of the Department of Paediatric Rheumatology of Leuven.  
30  
31  
32  
33  
34  
35  
36  
37  
38  
39  
40  
41

#### 42 **COMPETING INTERESTS**

43  
44 The authors declare that they have no competing interests.  
45  
46

#### 47 **DATA SHARING**

48  
49 No additional unpublished data  
50  
51  
52  
53  
54  
55  
56  
57  
58  
59  
60

## Reference List

- 1 Meleis AI: *Transitions Theory: Middle range and situation-specific theories in nursing research and practice*. New York: Springer Publishing Company; 2010.
- 2 American Academy of Pediatrics, American Academy of Family Physicians, American College of Physicians-American Society of Internal Medicine.: A consensus statement on health care transitions for young adults with special health care needs. *Pediatrics* 2002, **110**:1304-1306.
- 3 American Academy of Pediatrics, American Academy of Family Physicians, American College of Physicians, Transitions Clinical Report Authoring Group, Cooley WC, Sagerman PJ: Supporting the health care transition from adolescence to adulthood in the medical home. *Pediatrics* 2011, **128**:182-200.
- 4 Knauth A, Verstappen A, Reiss J, Webb GD: Transition and transfer from pediatric to adult care of the young adult with complex congenital heart disease. *Cardiol Clin* 2006, **24**:619-29, vi.
- 5 Chaturvedi S, Jones CL, Walker RG, Sawyer SM: The transition of kidney transplant recipients: a work in progress. *Pediatr Nephrol* 2009, **24**:1055-1060.
- 6 Craig SL, Towns S, Bibby H: Moving on from paediatric to adult health care: an initial evaluation of a transition program for young people with cystic fibrosis. *Int J Adolesc Med Health* 2007, **19**:333-343.
- 7 Holmes-Walker DJ, Llewellyn AC, Farrell K: A transition care programme which improves diabetes control and reduces hospital admission rates in young adults with Type 1 diabetes aged 15-25 years. *Diabet Med* 2007, **24**:764-769.
- 8 McDonagh JE, Southwood TR, Shaw KL: The impact of a coordinated transitional care programme on adolescents with juvenile idiopathic arthritis. *Rheumatology (Oxford)* 2007, **46**:161-168.
- 9 Remorino R, Taylor J: Smoothing things over: the transition from pediatric to adult care for kidney transplant recipients. *Prog Transplant* 2006, **16**:303-308.
- 10 Shaw KL, Southwood TR, McDonagh JE: Development and preliminary validation of the 'Mind the Gap' scale to assess satisfaction with transitional health care among adolescents with juvenile idiopathic arthritis. *Child Care Health Dev* 2007, **33**:380-388.
- 11 Steinkamp G, Ullrich G, Muller C, Fabel H, von der HH: Transition of adult patients with cystic fibrosis from paediatric to adult care--the patients' perspective before and after start-up of an adult clinic. *Eur J Med Res* 2001, **6**:85-92.
- 12 Hilderson D, Westhovens R, Wouters C, Moons P: Transitional care for adolescents with rheumatic diseases: urgent need for more research. *Child Care Health Dev* 2008, **34**:401-402.
- 13 Betz CL: Transition of adolescents with special health care needs: review and analysis of the literature. *Issues Compr Pediatr Nurs* 2004, **27**:179-241.



- 1  
2  
3 14 Hilderson D, Moons P, Westhovens R, Wouters C: Attitudes of rheumatology practitioners  
4 toward transition and transfer from pediatric to adult healthcare. *Rheumatol Int* 2012,  
5 **32**:3887-3896.
- 6  
7 15 Craig P, Dieppe P, Macintyre S, Michie S, Nazareth I, Petticrew M: Developing and evaluating  
8 complex interventions: the new Medical Research Council guidance. *BMJ* 2008, **337**:a1655.
- 9  
10 16 Campbell M, Fitzpatrick R, Haines A, Kinmonth AL, Sandercock P, Spiegelhalter D, Tyrer P:  
11 Framework for design and evaluation of complex interventions to improve health. *BMJ* 2000,  
12 **321**:694-696.
- 13  
14 17 Hilderson D, Corstjens F, Moons P, Wouters C, Westhovens R: Adolescents with juvenile  
15 idiopathic arthritis: who cares after the age of 16? *Clin Exp Rheumatol* 2010, **28**:790-797.
- 16  
17 18 Chaudhry SR, Keaton M, Nasr SZ: Evaluation of a cystic fibrosis transition program from  
18 pediatric to adult care. *Pediatr Pulmonol* 2013, **48**: 658-65.
- 19  
20 19 Mohler R, Bartoszek G, Kopke S, Meyer G: Proposed criteria for reporting the development and  
21 evaluation of complex interventions in healthcare (CRedeCI): guideline development. *Int J Nurs*  
22 *Stud* 2012, **49**:40-46.
- 23  
24 20 Creswell JW, Plano Clark VL: *Designing and conducting mixed methods research*. Thousand  
25 Oaks, California: Sage Publications; 2007.
- 26  
27 21 Eyckmans L, Hilderson D, Westhovens R, Wouters C, Moons P: What does it mean to grow up  
28 with juvenile idiopathic arthritis? A qualitative study on the perspectives of patients. *Clin*  
29 *Rheumatol* 2011, **30**:459-465.
- 30  
31 22 Hilderson D, Eyckmans L, Van der Elst K, Westhovens R, Wouters C, Moons P: Transfer from  
32 paediatric rheumatology to the adult rheumatology setting: experiences and expectations of  
33 young adults with juvenile idiopathic arthritis. *Clin Rheumatol* 2013, **32**: 575-83.
- 34  
35 23 Ullrich G, Mattussek S, Dressler F, Thon A: How do adolescents with juvenile chronic arthritis  
36 consider their disease related knowledge, their unmet service needs, and the attractiveness of  
37 various services? *Eur J Med Res* 2002, 7:8-18.
- 38  
39 24 Varni JW, Burwinkle TM, Seid M, Skarr D: The PedsQL 4.0 as a pediatric population health  
40 measure: feasibility, reliability, and validity. *Ambul Pediatr* 2003, 3:329-41.
- 41  
42 25 Varni JW, Seid M, Kurtin PS: PedsQL 4.0: reliability and validity of the Pediatric Quality of Life  
43 Inventory version 4.0 generic core scales in healthy and patient populations. *Med Care* 2001,  
44 **39**:800-12.
- 45  
46 26 Varni JW, Seid M, Smith KT, Burwinkle T, Brown J, Szer IS: The PedsQL in pediatric rheumatology:  
47 reliability, validity, and responsiveness of the Pediatric Quality of Life Inventory Generic Core  
48 Scales and Rheumatology Module. *Arthritis Rheum* 2002, **46**:714-725.
- 49  
50 27 Deschamps AE, De GS, Vandamme AM, Bobbaers H, Peetermans WE, Van WE: Diagnostic value  
51 of different adherence measures using electronic monitoring and virologic failure as reference  
52 standards. *AIDS Patient Care STDS* 2008, **22**:735-743.
- 53  
54 28 Hilderson D, Moons P, Wouters C, Westhovens R: Adolescents with juvenile idiopathic arthritis:  
55 what do they know about their condition? [abstract]. *Ann Rheum Dis* 2011, **70**:756
- 56  
57  
58  
59  
60

- 1  
2  
3 29 Moons P, Van Deyk K, De Bleser L, Marquet K, Raes E, De Geest S, Budts W: Quality of life and  
4 health status in adults with congenital heart disease: a direct comparison with healthy  
5 counterparts. *Eur J Cardiovasc Prev Rehabil* 2006, **13**:407-413.  
6  
7 30 Lin JM, Brimmer DJ, Maloney EM, Nyarko E, Belue R, Reeves WC: Further validation of the  
8 Multidimensional Fatigue Inventory in a US adult population sample. *Popul Health Metr* 2009,  
9 **7**:18.  
10  
11 31 Soenens B, Vansteenkiste M, Lens W, Luyckx K, Goossens L, Beyers W, Ryan RM:  
12 Conceptualizing parental autonomy support: adolescent perceptions of promotion of  
13 independence versus promotion of volitional functioning. *Dev Psychol* 2007, **43**:633-646.  
14  
15 32 Kins E, Beyers W, Soenens B, Vansteenkiste M: Patterns of home leaving and subjective well-  
16 being in emerging adulthood: the role of motivational processes and parental autonomy  
17 support. *Dev Psychol* 2009, **45**:1416-1429.  
18  
19 33 Soenens B, Vansteenkiste M, Luyckx K, Goossens L: Parenting and adolescent problem  
20 behavior: an integrated model with adolescent self-disclosure and perceived parental  
21 knowledge as intervening variables. *Dev Psychol* 2006, **42**:305-318.  
22  
23 34 Eddy L, Cruz M: The relationship between fatigue and quality of life in children with chronic  
24 health problems: a systematic review. *J Spec Pediatr Nurs* 2007, **12**:105-114.  
25  
26 35 Russo E, Trevisi E, Zulian F, Battaglia MA, Viel D, Facchin D, Chiusso A, Martinuzzi A:  
27 Psychological profile in children and adolescents with severe course Juvenile Idiopathic  
28 Arthritis. *ScientificWorldJournal* 2012, **2012**:841375.  
29  
30 36 Wallace CA, Ruperto N, Giannini E; Childhood Arthritis and Rheumatology Research Alliance;  
31 Pediatric Rheumatology International Trials Organization; Pediatric Rheumatology  
32 Collaborative Study Group: Preliminary criteria for clinical remission for select categories of  
33 juvenile idiopathic arthritis. *J Rheumatol* 2004, **31**:2290-4.  
34  
35 37 Ouwkerk JW, van Pelt PA, Takken T, Helders PJ, Net J: Evaluating score distributions in the  
36 revised Dutch version of the Childhood Health Assessment Questionnaire. *Pediatr Rheumatol*  
37 *Online J* 2008, **6**:14.  
38  
39 38 Singh G, Athreya BH, Fries JF, Goldsmith DP: Measurement of health status in children with  
40 juvenile rheumatoid arthritis. *Arthritis Rheum* 1994, **37**:1761-1769.  
41  
42 39 Takken T, van den Eijhof F, Hoijtink H, Helders PJ, van der Net J: Examining the psychometric  
43 characteristics of the Dutch childhood health assessment questionnaire: room for  
44 improvement? *Rheumatol Int* 2006, **26**:979-83.  
45  
46 40 Cohen J: A power primer. *Psychol Bull* 1992, **112**:155-159.  
47  
48 41 Berben L, Sereika SM, Engberg S: Effect size estimation: methods and examples. *Int J Nurs Stud*  
49 **2012**, **49**:1039-1047.  
50  
51 42 Cohen J: *Statistical power analysis for the behavioral sciences*. Lawrence Erlbaum Associates;  
52 1988.  
53  
54 43 Polit DF, Beck CT: **Nursing Research: principles and methods**. In *Nursing Research: Principle*  
55 *and Methods*. 7 edition. Philadelphia: Lippincott Williams & Wilkins; 2004.  
56  
57  
58  
59  
60

- 1  
2  
3 44 Graneheim UH, Lundman B: Qualitative content analysis in nursing research: concepts,  
4 procedures and measures to achieve trustworthiness. *Nurse Educ Today* 2004, **24**:105-112.  
5  
6 45 Babor TF: Avoiding the horrid and beastly sin of drunkenness: does dissuasion make a  
7 difference? *J Consult Clin Psychol* 1994, **62**:1127-1140.  
8  
9 46 Humeniuk R, Ali R, Babor T, Souza-Formigoni ML, de Lacerda RB, Ling W, McRee B, Newcombe  
10 D, Pal H, Poznyak V et al.: A randomized controlled trial of a brief intervention for illicit drugs  
11 linked to the Alcohol, Smoking and Substance Involvement Screening Test (ASSIST) in clients  
12 recruited from primary health-care settings in four countries. *Addiction* 2012, **107**:957-966.  
13  
14 47 Fachini A, Aliane PP, Martinez EZ, Furtado EF: Efficacy of brief alcohol screening intervention  
15 for college students (BASICS): a meta-analysis of randomized controlled trials. *Subst Abuse*  
16 *Treat Prev Policy* 2012, **7**:40.  
17  
18 48 Laure P, Mangin G: Advising parents on physical activity for children between 0 and 5 years. *J*  
19 *Sports Med Phys Fitness* 2011, **51**:467-472.  
20  
21 49 McDonagh JE, Southwood TR, Shaw KL; British Paediatric Rheumatology Group: Unmet education  
22 and training needs of rheumatology health professionals in adolescent health and transitional  
23 care. *Rheumatology (Oxford)* 2004, **43**(6):737-43.  
24  
25 50 O'Cathain A, Murphy E, Nicholl J: Integration and publications as indicators of 'yield' from  
26 mixed methods studies. *J Mix Methods Res* 2007, **1**:147-163.  
27  
28 51 Sawicki GS, Lukens-Bull K, Yin X, Demars N, Huang IC, Livingood W, Reiss J, Wood D: Measuring the  
29 transition readiness of youth with special healthcare needs: validation of the TRAQ--  
30 TransitionReadiness Assessment Questionnaire. *J Pediatr Psychol* 2011 Mar, **36**:160-71.  
31  
32 52 van Staa A, van der Stege HA, Jedeloo S, Moll HA, Hilberink SR: Readiness to transfer to adult care  
33 of adolescents with chronic conditions: exploration of associated factors. *J Adolesc Health*  
34 2011, **48**:295-302.  
35  
36  
37  
38  
39  
40  
41  
42  
43  
44  
45  
46  
47  
48  
49  
50  
51  
52  
53  
54  
55  
56  
57  
58  
59  
60

1  
2  
3  
4  
5  
6  
7  
8  
9  
10  
11  
12  
13  
14  
15  
16  
17  
18  
19  
20  
21  
22  
23  
24  
25  
26  
27  
28  
29  
30  
31  
32  
33  
34  
35  
36  
37  
38  
39  
40  
41  
42  
43  
44  
45  
46  
47  
48  
49  
50  
51  
52  
53  
54  
55  
56  
57  
58  
59  
60

**Rationale, design and baseline data of a mixed-methods study examining the clinical impact of a brief transition programme for young people with juvenile idiopathic arthritis: The DON'T RETARD project**

Deborah Hilderson, PhD, RN<sup>1,2</sup>; Rene Westhovens, MD, PhD<sup>3</sup>; Carine Wouters, MD, PhD<sup>4</sup>; Kristien Van der Elst, MSc, RN<sup>2,3</sup>; Eva Goossens, MSc, RN<sup>2,5</sup>; Philip Moons, PhD, RN<sup>2\*</sup>

<sup>1</sup>Department of Paediatrics, University Hospitals Leuven, Belgium

<sup>2</sup>Centre for Health Services and Nursing Research, [KU Leuven](#) Department of Public Health and Primary Care, [KU Leuven](#), Belgium

<sup>3</sup>Skeletal Biology and Engineering Research Centre, [KU Leuven](#) Department of Development and Regeneration, [KU Leuven](#); Rheumatology, University Hospitals Leuven, Belgium

<sup>4</sup>Department of Paediatric Rheumatology, University Hospitals Leuven, Belgium

<sup>5</sup> [PhD Fellowship, Research Foundation Flanders, Belgium](#)

\*Corresponding author: Philip Moons, Centre for Health Services and Nursing Research, [KU Leuven](#) Department of Public Health and Primary Care, [KU Leuven](#), Kapucijnenvoer 35, box 7001, B-3000 Leuven, Belgium; Tel: +32-16-336984; Fax: +32-16-336970, [philip.moons@med.kuleuven.be](mailto:philip.moons@med.kuleuven.be)

**Keywords:** brief intervention, complex intervention, mixed methods, adolescents, juvenile idiopathic arthritis, transition, transfer, study protocol, effect sizes, clinical relevance

**Word count:** ~~5250~~4770

Formatted: Not Highlight

**ABSTRACT**

**Objectives:**To describe (1) the content of a transition programme for young ~~people~~ with juvenile idiopathic arthritis (JIA) designed as a brief intervention, (2) the rationale and design of [a mixed-methods study](#) ~~the~~ evaluating [the clinical impact on](#) of this transition programme ~~using mixed methods~~, and (3) to provide baseline data [of the intervention group](#). ~~Since we hypothesized that the transition programme improves the physical, psychosocial, and rheumatic specific health of adolescents with JIA, baseline characteristics of young people who will participate in the transition programme are furthermore presented. We hypothesised that the transition programme improves the physical, psychosocial, and rheumatic specific health of adolescents with JIA~~

**Design:**An 'embedded experimental' ~~study~~ design [is will be used for the development and evaluation of the transition programme](#). ~~'study. Using a A~~ 'one-group pretest-posttest, with a non-equivalent posttest-only comparison group design', ~~is will be used we to~~ quantitatively evaluated the impact of the transition programme, applying both longitudinal and comparative analyses. Subsequently, experiences of adolescents and their parents who participated in the experimental group ~~will be were~~ analysed qualitatively, using content analysis.

**Setting:**Subjects participating [in](#) the intervention, ~~a~~ were recruited at a tertiary centre in Belgium. The comparison group subjects ~~a~~ were recruited from one tertiary and three secondary care centres in Belgium.

**Participants:**The intervention group consisted of 33 young people (25 females; 8 males), with a median age of [15.9916](#) years. Main diagnoses ~~a~~ were persistent or extended [oligo-articular](#) JIA (33.3%), poly-articular JIA (30.3%), enthesitis-related JIA (21.2%) or systemic arthritis (15.1%).

**Intervention:**The transition programme comprises 8 key components: (a) transition coordinator; (b) providing information and education; (c) availability by telephone; (d) information about and contact with adult care programme; (e) guidance of parents; (f) meeting with peers; (g) transfer plan; and (h) actual transfer to adult care.

**Primary and secondary outcomes:**The primary outcome ~~is s which will be assessed are was~~ health status, as perceived by the adolescents. Secondary outcomes ~~are were will be~~ health status, as perceived by the parents;

1  
2  
3  
4  
5  
6 medication adherence; illness-related knowledge; quality-of-life; fatigue; promotion of independence; support  
7 of autonomy; behavioural control; and psychological control.  
8  
9

10 **Results:**At baseline, the median score on psychosocial health was 69.217 (Q1=60.00;Q3=92.92) and 68.875  
11 (Q1=56.325;Q3=89.106) on physical health. Rheumatic-specific health scores ranged from 62.50 to 100.00.  
12  
13

14 **Conclusions:** We present the rationale and design of a study intended to evaluate a transition programme for  
15 adolescents with JIA as a brief intervention, and provided baseline data.  
16  
17  
18  
19  
20  
21  
22  
23  
24  
25  
26  
27  
28  
29  
30  
31  
32  
33  
34  
35  
36  
37  
38  
39  
40  
41  
42  
43  
44  
45  
46  
47  
48  
49  
50  
51  
52  
53  
54  
55  
56  
57  
58  
59  
60

## ARTICLE SUMMARY

### Article focus

- The content of ~~our a~~ transition programme for young people with juvenile idiopathic arthritis (JIA), designed as a brief intervention, is described.
- The rationale and design is provided of an new-innovative mixed-methods approach for studying the clinical impact of a brief interventional transition programme for young persons-people with juvenile idiopathic arthritis~~JIA~~ is provided.

### Key messages

- The ~~developed~~ transition programme developed contains five subsequent steps: (1) an introduction of the transition coordinator at an outpatient visit at paediatric rheumatology; (2) a second face-to-face visit with the transition coordinator, that takestake taking place at paediatric rheumatology; (3) an adolescent-information day for the young people and their parents; (4) the development of an individualized transfer plan; and (5) the actual transfer of care to adult rheumatology ~~care~~.
- The transition programme comprises eight essential key components that are implemented in one or more of the five steps: (a) a transition coordinator; (b) providing information and education about JIA and medication management, health behaviour, dealing with fatigue, school, friends and any problems with medication adherence; (c) availability by telephone; (d) information about and contact with the adult rheumatology programme; (e) guidance of parents; (f) meeting with peers; (g) a transfer plan; and (h) the actual transfer to adult rheumatology programme.

### Strengths and limitations

- A transition programme for adolescents with JIA is developed as a brief intervention, which may be is less costly and time-consuming than the existing, more comprehensive transitional care interventions.
- The development and evaluation of this transition programmes is guided by the initial Medical Research Council framework for complex interventions.
- The employment-use of a sequential mixed-methods approach within the is framework for complex intervention framework enables to gain better-full and integrative insight into the clinical impact of the key components of the transition programme.

1  
2  
3  
4  
5  
6  
7  
8  
9  
10  
11  
12  
13  
14  
15  
16  
17  
18  
19  
20  
21  
22  
23  
24  
25  
26  
27  
28  
29  
30  
31  
32  
33  
34  
35  
36  
37  
38  
39  
40  
41  
42  
43  
44  
45  
46  
47  
48  
49  
50  
51  
52  
53  
54  
55  
56  
57  
58  
59  
60

|

For peer review only

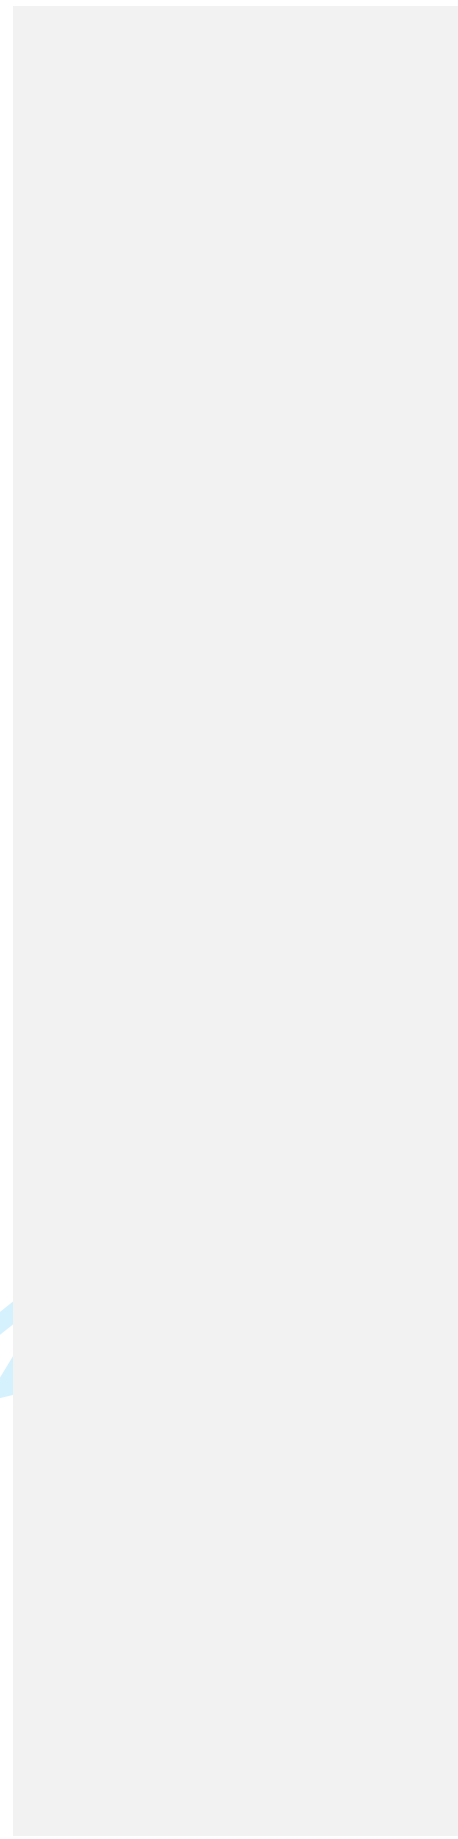



**BACKGROUND**

Some decades ago, several paediatric disorders were associated with high, progressive morbidity and increased mortality. For many people suffering from these chronic diseases, medical, surgical, and technological advancements have resulted in improved disease management and increased life expectancy. Unlike in past decades, children with a progressive deteriorating disorder now often live into adulthood managing a chronic disease. Expert lifetime care should be provided for these patients in order to maximise their potential and lifelong functioning ~~and potential of these people~~.

~~Adolescents-Young people~~ with chronic conditions undergo different stages during their life ~~wherein~~. ~~Two of the many important phenomena that~~ ~~which occur include at least two important phenomena occur~~. ~~First, their~~ ya developmental transition ~~developmentally~~ into adulthood, a phase during which young people ~~evol~~ ving from being a dependent child to becoming an independent adult [1]. Second, their setting of health care is ~~transferrings~~ from a paediatric context to an adult focused environment ~~one~~. Indeed, a timely and well-prepared transfer to adult-centred care is advocated [2,3]. This transfer is defined ~~specifically~~ as an event or series of events through which adolescents and young adults with chronic physical and medical conditions move their care from a paediatric to an adult health care environment [4]. According to the recent literature, the paediatric-to-adult ~~care~~ transfer of care should be preceded by a preparatory transitional phase. Transition is therefore defined as a process by which adolescents and young adults with chronic childhood illnesses are prepared to take charge of their lives and their health in adulthood [4].

In order to prepare young people ~~adolescents~~ to take on new responsibilities for their health and to anticipate the imminent transfer to adult care, transition programmes have been developed. The efficacy of these transition programmes has ~~ve~~ been evaluated to some extent in the last decade [5-11]. Using quasi-experimental designs, investigators have found some positive effects on quality of life [8], disease outcomes [5,7], number of admissions and the length of stay of readmissions [7], knowledge [8], work experience and career advice [8], and satisfaction with care [10]. The vast majority of the studies have been conducted in the United Kingdom [12], which may limit the generalizability of study findings to other health care systems due to ~~e.g. differences in financing and reimbursement of health care expenditures~~. Therefore, research on the efficacy of transition programmes in other countries is warranted [12].

Field Code Changed

1  
2  
3  
4  
5  
6  
7  
8  
9  
10  
11  
12  
13  
14  
15  
16  
17  
18  
19  
20  
21  
22  
23  
24  
25  
26  
27  
28  
29  
30  
31  
32  
33  
34  
35  
36  
37  
38  
39  
40  
41  
42  
43  
44  
45  
46  
47  
48  
49  
50  
51  
52  
53  
54  
55  
56  
57  
58  
59  
60

Existing transition programmes generally adopt a comprehensive approach, likely contributing to their positive effects. However, ~~they such extensive programmes~~ are also ~~perceived as being~~ costly and time-consuming to implement in day-to-day practice, ~~although economic cost-effectiveness studies are currently lacking~~. This is illustrated by the finding that the most frequently ~~perceived-reported~~ barriers to the formal transition of patients are limited time and lack of funding for a transition coordinator [13,14]. Hence, the cost-effectiveness of transition programmes can be questioned. In times of economic crisis and limited funding, more sustainable alternatives must be explored. Brief ~~evidence-based~~ interventions have the potential to be cost-effective. ~~The cost effectiveness of these brief evidence based interventions and~~ therefore, ~~are more likely to become implemented would in increase the possibility of their being implemented in~~ clinical practice.

Field Code Changed

Transition programmes can be viewed as complex interventions. Complex interventions are built up from a number of components that may act both independently and interdependently [15]. This implies that the active ingredient of the intervention is unknown or difficult to specify. The British Medical Research Council (MRC) has provided a framework for developing and evaluating complex interventions. It entails a recursive process of development, feasibility and pilot ~~testing~~, evaluation, and implementation of the complex intervention. Hence, before any formal efficacy assessment can be done, comprehensive preparatory work is conducted [15].

Field Code Changed

The original model of the MRC comprised an investigative sequence of five phases (Figure 1). First, theory and evidence are assessed in order to provisionally identify the steps and the key components of the intervention; this is termed the preclinical phase. Second, an understanding of the intervention and its possible effects is developed; this is termed phase I: modelling phase. Third, ~~the~~ feasibility of key components ~~are is~~ assessed, and recruitment procedures and measurement of outcomes are tested; this is termed phase II: exploratory trial phase. Fourth, randomised controlled trials are conducted to evaluate ~~the impact of~~ the complex intervention. These trials require adequate power, adequate randomisation, appropriate outcome measures, and other standard features of well-designed trials; this is termed phase III: definitive randomised controlled trial. Finally, separate studies are conducted to establish the long-term and real-life effectiveness of the intervention; this is termed phase IV: long-term implementation [15,16].

Field Code Changed

Field Code Changed

\*\*\* INSERT FIGURE 1 ABOUT HERE\*\*\*

1  
2  
3  
4  
5  
6  
7  
8  
9  
10  
11  
12  
13  
14  
15  
16  
17  
18  
19  
20  
21  
22  
23  
24  
25  
26  
27  
28  
29  
30  
31  
32  
33  
34  
35  
36  
37  
38  
39  
40  
41  
42  
43  
44  
45  
46  
47  
48  
49  
50  
51  
52  
53  
54  
55  
56  
57  
58  
59  
60

In order to develop and test a transition programme involving a complex and brief intervention, we established the DON'T RETARD project (Devices for the Optimization of TRAnsfer and Transition of Adolescents with Rheumatic Disorders). This ~~project~~ programme was designed for young people with ~~juvenile idiopathic arthritis (JIA)~~ (<http://www.kuleuven.be/switch2/rheuma.html>) and aimed ~~for to~~ provide ~~a~~ proof of concept for a transition programme devised as a brief intervention. We followed the original MRC framework for complex interventions. As part of the modelling phase, we conducted some preparatory studies that were previously published ~~elsewhere~~ [14,17]. The next step in the DON'T RETARD project is to evaluate the newly developed transition programme.

Field Code Changed

Field Code Changed

In the present ~~article~~ ~~methods paper~~, we ~~aim describe~~ (1) ~~to extensively describe~~ the content of ~~our a~~ transition programme for young people with JIA ~~that which was~~ designed as a brief intervention, ~~and~~ (2) ~~to describe~~ the rationale and design of ~~a mixed methods study the evaluation~~ ~~ng the clinical impact~~ of this transition programme. ~~using a mixed methods approach, aiming to test. The following~~, and (3) ~~to report the baseline characteristics of the intervention group on the respective primary and secondary outcomes. We hypothesized were tested that: The transition programme would improve the physical, psychosocial, and rheumatic-specific health of adolescents with JIA (primary outcome) [8,18]. Secondary. We also hypothesized that the programme would improve medication adherence, illness-related knowledge, quality of life, threshold to fatigue, and parenting styles in patients who participated in the programme (secondary outcomes). To guarantee transparency and quality of reporting describing our this complex intervention, we used the recently published criteria for reporting the development and evaluation of complex interventions (CReDECI) [19]. The results on the clinical impact of the transition programme will be reported in a forthcoming publication.~~

Field Code Changed

Field Code Changed

#### Transition programme as a brief intervention

Our transition programme, which is designed to be a brief intervention, contains five steps. We will describe ~~in turn~~ each step in the next section.

##### *Intervention steps*

(1) The first step occurs during a scheduled outpatient visit. The paediatric rheumatologist introduces the transition coordinator (TC) to the patient (aged 14-16 years) and his or her parents, and explains the

1  
2  
3  
4  
5  
6  
7  
8  
9  
10  
11  
12  
13  
14  
15  
16  
17  
18  
19  
20  
21  
22  
23  
24  
25  
26  
27  
28  
29  
30  
31  
32  
33  
34  
35  
36  
37  
38  
39  
40  
41  
42  
43  
44  
45  
46  
47  
48  
49  
50  
51  
52  
53  
54  
55  
56  
57  
58  
59  
60

transition programme. During this first face-to-face visit with the TC, the TC provides the patient and parents with a rheumatology management diary ([i.e., a booklet including self-reporting symptoms scales, an overview of scheduled appointments, space for writing down questions, etc.](#)), written information about JIA and medication management, and a DVD with instructions regarding appropriate exercising. The TC guides the ~~adolescent young person~~ and parent(s) through three patient information websites and presents a video about JIA and its consequences. [Young people have the possibility to see both the rheumatologist and TC without the presence of their parent\(s\). This independent visit is strongly encouraged.](#) ~~Also~~ Furthermore, ~~the a~~ second face-to-face visit [with the TC](#) is scheduled. The initial contact session lasts about 30-40 minutes. The TC is [however continuously](#) available by telephone to answer additional questions about the condition, therapy, transition process, health behaviour, and clinic appointments.

(2) The second step of the intervention occurs six months later, ~~and~~ ~~This~~ consists of a second face-to-face visit [with the TC, that takes](#) place at the [paediatric](#) outpatient clinic. During this visit, the TC ~~focuses~~ [discusses](#) health behaviour, dealing with fatigue, school, friends, self-image, knowledge about the disease, and any difficulties with medication adherence. Participants receive a folder about the practical issues related to the adult rheumatology programme (e.g., contact information for the secretary and rheumatologists, organisational information for the outpatient clinic, ~~etc.~~). This session ~~lasts~~ [lasts approximately 20-30](#) minutes.

(3) For the third step of the intervention, patients and their parents are invited to attend an adolescent information day. On this day, all patients who attended their second visit with the TC are invited to come together. The adolescent information day has two parallel programmes: one for the adolescents and one for the parents. The programme for adolescents begins with a brief introduction from the TC and the paediatric rheumatologist. Then the adolescents take part in a variety of activities: ~~They~~ meet with peers, take an orientation tour ~~of at~~ the adult care facilities, meet with the rheumatologists, ~~physiotherapist(s)~~ and nurse specialist of the adult rheumatology team, ~~meet the physiotherapist(s) of the adult rheumatology team,~~ and attend a workshop on psychological issues. These activities are followed by a cooking workshop, in which the adolescents prepare a complete meal for themselves and their parents. This allows them to talk with their peers in an informal setting.

The parallel programme for parents during this third step of the intervention is similar. A parent association representative is available so that the parents ~~can~~ express their concerns about their child's

1  
2  
3  
4  
5  
6  
7 ~~entering transition to~~ adulthood. Activities include taking an orientation tour ~~of at~~ the adult care facilities,  
8 meeting with the rheumatologists and nurse specialist of the adult rheumatology team, and attending a lecture  
9 on psychological issues inherent to the development of an adolescent with chronic disorders. After the formal  
10 programme, parents join their children for the dinner prepared by the children. The adolescent information day  
11 programme, parents join their children for the dinner prepared by the children. The adolescent information day  
12 starts at ~~14.00 to~~ 2PM and ends at ~~18.30 to~~ 6.30PM, and takes place twice during the transition programme. For  
13 each information day, about 15 patient-parents dyads participate.  
14  
15

16  
17 (4) For the fourth step, ~~an individualized transfer plan is developed by the TC develops an individual~~  
18 ~~patient transfer plan for each patient based on conversations with the young person and the parents.~~ This ~~plan~~  
19 ~~is developed occurs~~ before transferring ~~the patient~~ from paediatric ~~rheumatology~~ to adult rheumatology. ~~The~~  
20 ~~transfer~~ This plan is based on the coding structure of the International Classification of Functioning, Disability  
21 and Health for Children and Youth (ICF-CY). By shifting the focus from cause to impact, the ICF-CY puts all  
22 health conditions on an equal footing, allowing them to be compared using a common metric. Furthermore, it  
23 takes into account the social aspects of a disability and does not view disability only as a 'medical' or 'biological'  
24 dysfunction. By including contextual factors, in which environmental factors are listed, the ICF-CY allows us to  
25 record the impact of an environment on a person's functioning. The transfer plan also is based on patient  
26 information collected by the paediatric rheumatologist, the TC, and other health care professionals that are  
27 consulted. The development of a transfer plan requires 30 minutes per patient.  
28  
29

30  
31 (5) The fifth step is the actual transfer. Once the transfer plan is handed over to the adult  
32 rheumatologist, the patient is considered transferred to adult rheumatology care. The third face-to-face visit  
33 with the TC occurs during the patient's first outpatient visit to adult rheumatology care. This time, the  
34 rheumatologist of the adult rheumatology programme joins the session, along with the TC, patient, and  
35 parents. The TC focuses on health behaviour and medication information. During this outpatient visit, the  
36 patient is formally 'handed over' to the adult rheumatology providers. This session lasts about 20 minutes.  
37  
38

#### 39 *Intervention key components*

40  
41 The transition programme comprises ~~8 essential~~ key components that are implemented in one or  
42 more of the five steps: (a) a transition coordinator; (b) providing information and education about JIA and  
43 medication management, health behaviour, dealing with fatigue, school, friends and any problems with  
44 medication adherence; (c) availability by telephone; (d) information about and contact with the adult  
45  
46

1  
2  
3  
4  
5  
6  
7  
8  
9  
10  
11  
12  
13  
14  
15  
16  
17  
18  
19  
20  
21  
22  
23  
24  
25  
26  
27  
28  
29  
30  
31  
32  
33  
34  
35  
36  
37  
38  
39  
40  
41  
42  
43  
44  
45  
46  
47  
48  
49  
50  
51  
52  
53  
54  
55  
56  
57  
58  
59  
60

rheumatology programme; (e) guidance of parents; (f) meeting with peers; (g) a transfer plan; and (h) the actual transfer to adult rheumatology programme.

Altogether, the TC spends 60 to 90 minutes per patient, spread over a period of 1.5 years. This is in addition to the 40 man-hours (for the TC, paediatric rheumatologists, rheumatologists of the adult setting, physiotherapists, nurses of adult rheumatology, psychologists) incurred by the adolescent information day activities and the 20 hours needed for its preparation. Overall, ~~it was estimated for this brief intervention, that the time and work investment of one full-time equivalent is needed to implement this brief intervention from the different disciplines involved in rheumatologic care could take on for~~ a caseload of 250 to 300 transitioning patients.

#### METHODS AND DESIGN

To develop and evaluate the transition programme, we ~~applied~~ a mixed-methods approach in which quantitative and qualitative studies are combined. More specifically, we ~~used~~ an 'embedded experimental design' [20]. This design is characterised by ~~a set of~~ qualitative studies ~~that which were~~ conducted before and after a quantitative study. In our project, the embedded experimental design ~~started~~ with a qualitative study using in-depth interviews. The aim of ~~these~~ interviews ~~was~~ to better understand the transitional needs of young people with JIA. The information obtained in this qualitative study assisted us in developing the transition programme. Hence, this particular qualitative study corresponds to the modelling phase of the MRC framework (Figure 1, green box). The methods and results of this ~~first~~ qualitative study are reported in two related articles [21,22]. Therefore, ~~we do not elaborate on this study in the present article. However, we did not solely~~ rely on our qualitative findings to determine the content of the transition programme. ~~Indeed~~ ~~Additionally, we built upon previously published studies on transitional care this topic to design our~~ ~~intervention.~~ [8,10,21,22,23]

Subsequently, we ~~conducted~~ a quasi-experimental study employing a 'one-group pretest-posttest, with a non-equivalent posttest-only comparison group' design' (Figure 1, purple box; Figure 2). In this quantitative study, we ~~investigated~~ the clinical outcomes of patients with JIA and their parents who ~~participated~~ in the transition programme. In this respect, longitudinal analyses ~~will be~~ ~~were~~ conducted to

Field Code Changed

Field Code Changed

1  
2  
3  
4  
5  
6  
7 investigate changes over time (Figures 1, 2; indicated in red). Furthermore, comparative analyses ~~will be~~ were  
8 performed by comparing the ~~posttest~~post-test scores of the intervention group with those of patients who  
9 received usual care (Figures 1, 2; indicated in blue). This quantitative study (~~which included longitudinal and~~  
10 ~~comparative analyses~~) is called study 1 in figure 2. After ~~thise~~ initial quantitative study, a second qualitative  
11 study using an explanatory design ~~i~~was conducted (study 2; indicated in orange), ~~in which~~ ~~in study 2~~, we  
12 elaborated ~~d~~ on the experiences of adolescents with JIA and their parents ~~on~~ regarding their participation in the  
13 transition programme. Both studies 1 and 2 are considered to correspond to the exploratory trial phase of the  
14 MRC framework (see above, Background section).  
15  
16  
17  
18  
19

20  
21 \*\*\* INSERT FIGURE 2 HERE \*\*\*  
22  
23  
24  
25

#### 26 **Study 1.a. Quantitative study: longitudinal analysis**

##### 27 *Inclusion criteria*

28  
29  
30 Potential subjects ~~a~~were recruited during a scheduled visit at the outpatient clinic, between February 1, 2009,  
31 and February 1, 2011. Dutch-speaking ~~adolescents~~ young people (14-16 years of age) with JIA, treated and in  
32 active follow-up at the Department of Paediatric Rheumatology of the University Hospitals ~~of~~ Leuven, ~~a~~were  
33 invited to participate in the intervention trial. Patients ~~a~~were excluded if they ~~were~~ ~~haved~~ a developmental or  
34 cognitive disabilities ~~sy~~ ~~mentally~~ ~~retarded~~ ~~\_~~ or if they ~~do~~id not have the physical capacities to complete the  
35 questionnaires used in the study. The convenience sample included ~~d~~ all eligible subjects.  
36  
37  
38  
39  
40  
41

##### 42 *Informed consent*

43  
44 Patients ~~a~~were included after obtaining written informed consent from the parents and informed assent from  
45 the patients (all patients were minors at the time of inclusion). Anonymity ~~i~~was guaranteed, and patients and  
46 parents ~~a~~were assured that they could stop participating at any time.  
47  
48  
49  
50  
51

##### 52 *Variables and measurements*

1  
2  
3  
4  
5  
6  
7  
8  
9  
10  
11  
12  
13  
14  
15  
16  
17  
18  
19  
20  
21  
22  
23  
24  
25  
26  
27  
28  
29  
30  
31  
32  
33  
34  
35  
36  
37  
38  
39  
40  
41  
42  
43  
44  
45  
46  
47  
48  
49  
50  
51  
52  
53  
54  
55  
56  
57  
58  
59  
60

All subjects ~~awere~~ assessed three times: at baseline (T<sub>0</sub>), at the second outpatient visit at paediatric rheumatology (T<sub>1</sub>), and at the first outpatient rheumatology consultation in the adult care setting (T<sub>2</sub>) (Figure 2). ~~We At each point in time we~~ measured the primary ~~outcome, and~~ secondary outcomes, ~~as well as and~~ disease parameters. The primary outcome ~~of interest iwas~~ the self-perceived health status of the ~~adolescentspatient,~~ as measured with the Pediatric Quality of Life Inventory (PedsQL™). We used ~~both~~ the generic (PedsQL™ 4.0 Generic Core Scales) and the disease-specific module (PedsQL™ 3.0 Rheumatology Module) [24,25,26,3,24].

Field Code Changed

We measured ~~the following set of~~ secondary outcomes salient to the ~~adolescentsyoung people: the adolescents' patients'~~ health status as perceived by their parents, which ~~iwas~~ measured with the PedsQL™ 4.0 Generic Core Scales and PedsQL™ 3.0 Rheumatology Module [24,25,26,3,24]. ~~Furthermore a set of patients self-reported secondary outcomes awere assessed: medication adherence is, which was~~ measured using a Visual Analogue Scale (VAS) and the Swiss HIV Cohort Study Adherence Questionnaire (SHCS-AQ) [275]. ~~Illness-related knowledge, which was~~ measured using the modified Patient Knowledge Questionnaire (PKQ) [286]; ~~and; the level of global quality of life, which was~~ measured using a Linear Analogue Scale (LAS) [297]. ~~and Fatigue, which iwas~~ measured using the Multidimensional Fatigue Inventory (MFI-20) [3028]. ~~Finally in the group of For~~ parents, ~~four dimensions of parenting awere assessed using parent-reported instruments. the secondary outcomes that we measured were as follows: p~~Promotion of independence ~~by parents, which iwas~~ measured using the Promotion of Independence Scale [3129]; ~~and support of autonomy, which iwas~~ measured using the Autonomy Support Scale [320]. ~~Furthermore; the level of behavioural control (i.e., parental monitoring of child's behaviour), which iwas measured-assessed~~ using the Parental Regulation Scale [334]; ~~and while the aspect of- psychological control (i.e., intrusive and manipulative form of controlling), which iwas~~ measured using the Psychological Control Scale [334]. These outcomes ~~are-awere~~ all found to be suboptimal in patients with JIA [3129,33-35,231-34]. We hypothesized that participation in the transition programme could improve medication adherence, illness-related knowledge, quality of life, fatigue, and parenting style.

Field Code Changed

With regard to disease parameters, we evaluated ~~the clinical presence/absencestatus~~ of disease activity ~~and; clinical remission on/off medication; clinical remission off medication according to the preliminary criteria of Wallace et al [36]. Furthermore, and the functional status; iwas~~ assessed by the patient-reported and parent-reported Child Health Assessment Questionnaire (CHAQ-DI) [375,36-39]. Detailed information

Field Code Changed



1  
2  
3  
4  
5  
6  
7 about the ~~assessments and~~ instruments used to assess the clinical impact of in this study the transition  
8 programme is ~~are~~ shown in Table 1.  
9  
10  
11  
12  
13  
14  
15  
16  
17  
18  
19  
20  
21  
22  
23  
24  
25  
26  
27  
28  
29  
30  
31  
32  
33  
34  
35  
36  
37  
38  
39  
40  
41  
42  
43  
44  
45  
46  
47  
48  
49  
50  
51  
52  
53  
54  
55  
56  
57  
58  
59  
60

For peer review only



|                                                                                                                   |                                                                                                               |           |    |                                                                 |                                                                                                                                                                                                                                                     |                                                      |                                                                                                                                   |
|-------------------------------------------------------------------------------------------------------------------|---------------------------------------------------------------------------------------------------------------|-----------|----|-----------------------------------------------------------------|-----------------------------------------------------------------------------------------------------------------------------------------------------------------------------------------------------------------------------------------------------|------------------------------------------------------|-----------------------------------------------------------------------------------------------------------------------------------|
|                                                                                                                   |                                                                                                               |           |    |                                                                 | validity confirmed (Moens et al., 2006)[29], p.410                                                                                                                                                                                                  | [29](Moens et al., 2006), p.410                      | 100 (best imaginable quality of life)                                                                                             |
| <b>Fatigue</b>                                                                                                    | <i>Multidimensional Fatigue Inventory (MFI-20)</i>                                                            | PAT       | 20 | construct validity confirmed [30](Lin et al., 2009), p. 6       | internal consistency confirmed:<br>general fatigue, $\alpha=0.82$ ;<br>physical fatigue, $\alpha=0.81$ ;<br>reduced activity, $\alpha=0.82$ ;<br>reduced motivation, $\alpha=0.71$ ;<br>mental fatigue, $\alpha=0.86$ [30](Lin et al., 2009), p.4-6 | responsiveness confirmed [30](Lin et al., 2009), p.6 | <ul style="list-style-type: none"> <li>• scores from 4-20</li> <li>• higher scores indicate a higher degree of fatigue</li> </ul> |
| <b>Parenting dimensions</b>                                                                                       |                                                                                                               | PAR       |    |                                                                 |                                                                                                                                                                                                                                                     |                                                      | <ul style="list-style-type: none"> <li>• scores from 1 to 5</li> </ul>                                                            |
| <b>a. promotion of independence</b>                                                                               | <i>Promotion Independence Scale (PI)</i>                                                                      |           | 8  | NR                                                              | internal consistency confirmed ( $\alpha=0.76$ ) [31](Soenens et al., 2007), p.17                                                                                                                                                                   | NR                                                   | a. higher scores indicate more promotion of independence                                                                          |
| <b>b. support of autonomy</b>                                                                                     | <i>Autonomy Support Scale (PVF)</i>                                                                           |           | 7  | NR                                                              | internal consistency confirmed ( $\alpha=0.70-0.72$ ) [Kins et al., 2009][32], p.1420                                                                                                                                                               | NR                                                   | b. higher scores indicate more support of autonomy                                                                                |
| <b>c. behavioural control</b>                                                                                     | <i>Parental Regulation Scale (PRS-YSR revised to parent self-report)</i>                                      |           | 16 | construct validity confirmed [33](Soenens et al., 2006), p. 309 | NR                                                                                                                                                                                                                                                  | NR                                                   | c. higher scores indicate more behavioural control                                                                                |
| <b>d. psychological control</b>                                                                                   | <i>Psychological Control Scale (PCS-YSR revised to parent self-report)</i>                                    |           | 8  | NR                                                              | internal consistency confirmed ( $\alpha=0.69$ ) [33](Soenens et al., 2006), p.545-546                                                                                                                                                              | NR                                                   | d. higher scores indicate more psychological control                                                                              |
| <b>Absence of disease activity</b>                                                                                | [Wallace et al., 2004][36]                                                                                    | MD        | NA | NA                                                              | NA                                                                                                                                                                                                                                                  | NA                                                   | inactive disease or active disease                                                                                                |
| Two types of clinical remission:<br>(a) Clinical remission on medication<br>(b) Clinical remission off medication | [36](Wallace et al., 2004)                                                                                    | MD        | NA | NA                                                              | NA                                                                                                                                                                                                                                                  | NA                                                   | no clinical remission, clinical remission on medication, or clinical remission off medication                                     |
| <b>Functional status</b>                                                                                          | <i>Childhood Health Assessment Questionnaire (CHAQ-DI)</i> [37,38] [Ouwkerk et al., 2008; Singh et al., 1994] | PAT & PAR | 30 | construct validity confirmed [39](Rakken et al., 2006), p. 980  | NR                                                                                                                                                                                                                                                  | NR                                                   | scores from 0 (good functional status) to 3 (poor functional status)                                                              |

Legend: ICC, intra-class correlation; MD, medical doctor; NA, not applicable; NR, not reported; PAT, patient; PAR, parent.

### Data analysis

Since this study ~~was~~ an exploratory trial formulated according to the MRC framework of complex interventions, our aim ~~was~~ not to test the efficacy of the transition programme; rather it ~~was~~ a 'proof of concept' for the transition programme ~~concept~~ as a brief intervention. Therefore, we ~~will~~ not look for statistical significances but rather for clinical differences. Differences in patient- and parent-related outcomes, which ~~are~~ measured continuously starting at T<sub>0</sub> (before intervention) to T<sub>2</sub> (after intervention), ~~will be~~ were expressed as effect sizes.

For continuous variables, an effect size for the Wilcoxon test ~~will be~~ was calculated by using  $r = Z/\sqrt{n}$ , where Z is the normal approximation of the Wilcoxon test statistic. To appraise the magnitude of the effect sizes, we ~~will use~~ Cohen's r. An effect size of 0.1 to 0.3 is considered to be small, whereas effects sizes of 0.3 to 0.5 and  $\geq 0.5$  ~~or higher~~ are considered to be medium and large, respectively [4037].

Field Code Changed

Adherence ~~will be~~ was dichotomised as adherent or non-adherent. For this outcome, odds ratios ~~will be~~ were calculated to report the effect size. The odds ratio is the ratio of the odds of an outcome (e.g., being adherent) of one group (T<sub>0</sub>, before intervention), to the odds of the outcome of the other group (T<sub>2</sub>, after intervention). To appraise the magnitude of this odds ratio, we ~~will use~~ the following suggested cut-off values ~~for the odds ratios~~: 1.5 to 2.5 is a small effect; 2.5 to 4.3 is a medium effect; and 4.3 or higher is a large effect [4138,4239].

Field Code Changed

Nominal data ~~will be~~ were expressed in frequencies and percentages. Medians and quartiles (Q1-Q3) ~~will be~~ were calculated for continuous, non-normally distributed variables.

### Baseline data

The ~~sample-intervention group~~ consisted of 33 ~~adolescents~~ young people, 25 of which ~~are~~ female and 8 male. Detailed information about JIA subtype, ~~prescribed~~ medication ~~prescription~~ and remission status (on or off therapy) and the outcome data is shown in Table 2. At baseline, patients reported a median score on psychosocial health of 69.2 (Q1=60.0;Q3=92.9) and 68.8 (Q1=56.3;Q3=89.1) on physical health (PedsQoL). For rheumatic-specific health (PedsQoL), median scores ranged between 62.5 and 100, with worst scores for pain and hurt, and best scores for daily activities (PedsQoL). Furthermore, patients reported a median score for

Formatted: Not Highlight

functional status (CHAQ-DI) of 0.3 (Q1=0.1;Q3=0.6) and 73.0 (68.5;90.0) on quality of life (LAS). Regarding fatigue, the scores on ~~was~~ the motivation subscale ~~was~~ ~~rated~~ worst (7.0).

Formatted: Not Highlight

\*\*\* INSERT TABLE 2 HERE \*\*\*

Table 2. Demographic, clinical characteristics and baseline outcome data of ~~33 adolescents young people~~ with JIA ~~at baseline~~ included in the intervention group (n = 33)

| Baseline data                                                                                                      | <del>(n=33)</del>                  |
|--------------------------------------------------------------------------------------------------------------------|------------------------------------|
| <u>Gender/Sex n(%)</u>                                                                                             |                                    |
| female                                                                                                             | 25 (75.8%)                         |
| male                                                                                                               | 8 (24.2%)                          |
| <u>Subtype of JIA based on preliminary criteria of Wallace (2004) n(%)</u>                                         |                                    |
| persistent/ <del>extended</del> oligo-articular- JIA                                                               | 11 (33.3%)                         |
| Poly-articular JIA (RF-, RF+)                                                                                      | 10 (30.3%)                         |
| systemic arthritis                                                                                                 | 5 (15.1%)                          |
| enthesitis-related arthritis                                                                                       | 7 (21.2%)                          |
| <u>Age median, in years (Q<sub>1</sub>;Q<sub>3</sub>)</u>                                                          | <del>15.99</del> 16 (15.215;17.12) |
| <u>Presence of JIA disease activity n(%)</u>                                                                       | 10 (30.3%)                         |
| <u>Functional status (CHAQ-DI patient-report) median functionality<sub>ado</sub> (Q<sub>1</sub>;Q<sub>3</sub>)</u> | <del>0.25-3</del> (0.13;0.63)      |
| <u>Presence of clinical remission on therapy n(%)</u>                                                              | 17 (51.5%)                         |
| <u>Presence of clinical remission off therapy n(%)</u>                                                             | 5 (15.2%)                          |
| <u>medication-<del>P</del>prescribed medication n (%)</u>                                                          |                                    |
| ___ NSAIDS                                                                                                         | 14 (60.9%)                         |
| ___ DMARDS                                                                                                         | 10 (43.5%)                         |
| ___ biologicals                                                                                                    | 6 (26.0%)                          |
| ___ glucocorticsteroids                                                                                            | 4 (17.4%)                          |
| <u>Primary outcomes_ data in young people <del>adolescents</del> median (Q<sub>1</sub>;Q<sub>3</sub>)</u>          |                                    |
| <u>Perceived health status (PedsQL™ 4.0 Generic Core Scale)</u>                                                    |                                    |
| psychosocial health ( <del>generic</del> )                                                                         | <del>69.217</del> (60.000;92.92)   |
| physical health ( <del>generic</del> )                                                                             | <del>68.875</del> (56.325;89.106)  |
| <u>Perceived health status (PedsQL™ 3.0 Rheumatology Module)</u>                                                   |                                    |
| treatment ( <del>rheumatology</del> )                                                                              | <del>76.879</del> (71.43;100.00)   |
| communication ( <del>rheumatology</del> )                                                                          | <del>75.000</del> (66.67;91.67)    |

|                                                                                                  |                            |
|--------------------------------------------------------------------------------------------------|----------------------------|
| pain and hurt ( <a href="#">rheumatology</a> )                                                   | 62.50 (50.00;93.875)       |
| daily activities ( <a href="#">rheumatology</a> )                                                | 100.0.00 (91.325;100.0.00) |
| worry ( <a href="#">rheumatology</a> )                                                           | 75.0.00 (66.67;91.67)      |
| <b>Secondary outcomes in young people data-adolescents_ median (Q<sub>1</sub>;Q<sub>3</sub>)</b> |                            |
| <a href="#">Global quality of life (LAS)</a>                                                     | 73.0.00 (68.5;90.0.00)     |
| <a href="#">Illness-related knowledge (PKQ)</a>                                                  | 31.325 (18.875;43.875)     |
| <b>Fatigue (MFI-20) median (Q<sub>1</sub>;Q<sub>3</sub>)</b>                                     |                            |
| motivation                                                                                       | 7.0.00 (5.235;9.0.00)      |
| mental fatigue                                                                                   | 9.5 (7.0.00;12.875)        |
| activity                                                                                         | 9.50 (7.0.00;12.0.00)      |
| physical fatigue                                                                                 | 9.50 (6.325;13.875)        |
| general fatigue                                                                                  | 9.50 (7.325;13.0.00)       |
| <b>Secondary outcome data-adolescents (%)</b>                                                    |                            |
| <a href="#">Presence of medication adherence (SHCS-AQ)</a>                                       | 23 (69.70%)                |
| <b>Secondary outcomes in data-parents median (Q<sub>1</sub>;Q<sub>3</sub>)</b>                   |                            |
| <b>Dimensions of parenting style median (Q<sub>1</sub>;Q<sub>3</sub>)</b>                        |                            |
| autonomy support ( <a href="#">PVF</a> )                                                         | 3.83 (3.33;4.33)           |
| promotion of independence ( <a href="#">PI</a> )                                                 | 3.438 (3.13;1.875)         |
| behavioural control ( <a href="#">PRS-YSR revised to parent self-report</a> )                    | 4.0.00 (3.60;4.30)         |
| psychological control ( <a href="#">PCS-YSR revised to parent self-report</a> )                  | 2.0.00(1.875;2.50)         |
| <b>Perceived health status (PedsQL™ 4.0 Generic Core Scale, parent report)</b>                   |                            |
| psychosocial health ( <a href="#">generic</a> )                                                  | 85.0.00 (71.67;90.0.00)    |
| physical health ( <a href="#">generic</a> )                                                      | 73.0.00 (56.325;96.988)    |
| <b>Perceived health status (PedsQL™ 3.0 Rheumatology Module, parent report)</b>                  |                            |
| treatment ( <a href="#">rheumatology</a> )                                                       | 89.329 (71.43;97.32)       |
| communication ( <a href="#">rheumatology</a> )                                                   | 75.0.00 (64.658;91.67)     |
| pain and hurt ( <a href="#">rheumatology</a> )                                                   | 84.438 (50.0.00;95.34)     |
| daily activities ( <a href="#">rheumatology</a> )                                                | 100.0 (90.0.00;100.0.00)   |
| worry ( <a href="#">rheumatology</a> )                                                           | 91.67 (66.67;100.0.00)     |

#### Ethical issues

1  
2  
3  
4  
5  
6  
7 The Institutional Review Board of the University Hospitals Leuven, Belgium, evaluated and approved the study  
8 protocol (B32220096363). This study ~~was~~ performed with ethical standards as described in the latest  
9 Declaration of Helsinki.  
10

#### 14 Study 1.b. Quantitative study: comparative analysis

##### 16 *Inclusion criteria*

18 The intervention group's subject inclusion criteria ~~are~~ described above. The comparison group consisted of  
19 ~~45 adolescents young people~~ aged 17-23 years ~~and their parents. These patients, who~~ already ~~have~~ been  
20 transferred to the adult rheumatology programme, ~~and their parents. These patients were transferred from~~  
21 ~~paediatric rheumatology to the adult programme~~ without participating in a specific self-  
22 management/transition programme (i.e., they received the usual care). The comparison group subjects were  
23 recruited from four different health centres in Belgium. ~~Those Patients~~ who ~~have a developmental or cognitive~~  
24 ~~disabilities~~ ~~were mentally retarded~~ or ~~do~~ not have the physical capacities to complete the questionnaires ~~used~~  
25 ~~in the study~~ ~~are~~ excluded. Subjects of the comparison group (n=23) ~~are~~ included in the analyses if they  
26 ~~could~~ be matched with an intervention group subject in terms of disease activity, medication prescribed, JIA  
27 subtype, and gender.  
28  
29  
30  
31  
32  
33  
34  
35  
36  
37

##### 38 *Definition of usual care*

39 For the purposes of this study, usual care is defined as the care that is currently provided in day-to-day clinical  
40 practice. ~~Adolescents Young people with JIA~~ are usually followed up at the paediatric rheumatology  
41 programme until the age of 16 years. Around that age, the adolescent might have a first outpatient visit with  
42 the adult rheumatologist and the paediatric rheumatologist together. When the rheumatologists, the patient,  
43 and his or her parents agree that the patient is ready for transfer, an appointment for an adult rheumatology  
44 consultation is made. No transition coordinator or formal transition plan is ~~provided used to patients in the~~  
45 ~~comparison group who received usual care.~~  
46  
47  
48  
49  
50  
51  
52  
53  
54  
55  
56  
57  
58  
59  
60

1  
2  
3  
4  
5  
6  
7  
8  
9  
10  
11  
12  
13  
14  
15  
16  
17  
18  
19  
20  
21  
22  
23  
24  
25  
26  
27  
28  
29  
30  
31  
32  
33  
34  
35  
36  
37  
38  
39  
40  
41  
42  
43  
44  
45  
46  
47  
48  
49  
50  
51  
52  
53  
54  
55  
56  
57  
58  
59  
60

### *Informed consent from comparison group subjects*

We used the same procedure described above that we used for the intervention group; the young people above 18 years of age provided their own written informed consent.

### *Variables and measurements*

The variables and measurements used in these comparative analyses ~~awere~~ were the same as those used in the longitudinal analyses (see above). The measures for the comparison group ~~awere~~ were acquired during one of the scheduled outpatient visits at the adult care clinic (T<sub>2</sub>) (see Figure 2).

### *Data analysis*

As with the longitudinal analyses, we ~~awere~~ were interested in clinical differences instead of statistical differences. In the comparative analyses, the scores of the intervention and comparison groups at T<sub>2</sub> will be ~~were~~ compared. The cut-off values used for the longitudinal analyses also will be ~~were~~ used for the comparative analyses.

### *Ethical Issues*

The Institutional Review Board of the University Hospitals Leuven, Belgium, evaluated and approved the study protocol (B32220096363). This study ~~iw~~ was performed with ethical standards as described in the latest Declaration of Helsinki.

## **Study 2. Qualitative study**

### *Design*

We used an explanatory design to expand the quantitative results with qualitative data [20]. To gain insight into the processes underpinning the transition programme, we conducted in-depth interviews with the adolescents-young people and parents of the intervention group. The specific aims of this qualitative study

Field Code Changed



1  
2  
3  
4  
5  
6  
7 ~~awere~~ (i) to get an understanding of the reasons why particular effects ~~awere~~ are observed ~~and why others are~~  
8 ~~not~~, and (ii) to evaluate the feasibility and the utility of the key components of the complex intervention from  
9  
10 the patients' and parents' perspective.

#### 11 12 13 14 ***Inclusion criteria***

15  
16 Those participating in the intervention group [of this qualitative study](#) (~~adolescents-young people~~ and their  
17 parents) ~~awere~~ purposively sampled and invited to take part in the interviews. Sampling continued until no  
18 new themes emerged ~~ed~~ from the data (i.e., until [data saturation](#) ~~of the data~~ ~~was~~ reached).  
19  
20  
21  
22  
23

#### 24 ***Informed consent***

25  
26 Subjects ~~awere~~ included in the qualitative study after we obtained written informed consent for this particular  
27 ~~sub~~study. If the patient ~~was~~ a minor, informed consent ~~was~~ obtained from the parents and informed assent  
28 from the patient. Anonymity ~~was~~ guaranteed, and patients and parents ~~awere~~ assured that they ~~can~~ stop  
29 the interview at any time.  
30  
31  
32  
33  
34

#### 35 ***Data collection***

36  
37 We employ~~ed~~ a predefined interview guide, previously adjusted by an expert panel consisting of one  
38 rheumatologist (RW), one paediatric rheumatologist (CW), and three researchers (KV, PM, DH) in the field of  
39 care transition. We asked ~~adolescents-young people~~ and parents to answer open-ended questions about the  
40 TC, the adolescent information day, the time of transfer, and general ~~feelings-experiences~~ about the transition  
41 programme intervention.  
42  
43  
44  
45

46 ~~Adolescents-Young people~~ and parents ~~awere~~ interviewed at home, each in a different room. Different  
47 strategies ~~awere~~ used to assess the trustworthiness of the research: investigator triangulation, bracketing, and  
48 building a relationship of trust with the subject. Investigator triangulation requires that more than one  
49 investigator collect and analyse the raw data, so that the findings emerge through a consensus of a team of  
50 investigators [430]. Bracketing is the process of identifying and holding in abeyance preconceived beliefs and  
51  
52  
53  
54

Field Code Changed

1  
2  
3  
4  
5  
6  
7  
8  
9  
10  
11  
12  
13  
14  
15  
16  
17  
18  
19  
20  
21  
22  
23  
24  
25  
26  
27  
28  
29  
30  
31  
32  
33  
34  
35  
36  
37  
38  
39  
40  
41  
42  
43  
44  
45  
46  
47  
48  
49  
50  
51  
52  
53  
54  
55  
56  
57  
58  
59  
60

opinions about the phenomenon under study [439]. Bracketing makes the researcher aware of his or her beliefs and opinions about the phenomenon under study. To build a trusting relationship with each subject, we make certain that the interviewers were not part of the therapeutic team and that the interviews take place in a room where the subject feels comfortable. These methods ensured that researcher-related bias was minimised.

Field Code Changed

### Data analysis

The interviews will be were analysed by using qualitative content analysis, according to the method of Graneheim and Lundman [441]. Each interview was audio-taped and transcribed verbatim. The interviews will were read through several times to obtain a good understanding of the content. The first step in the analysis was the identification of meaning units (i.e., constellations of words or statements that were related to the same central meaning). The meaning units were labelled with codes, which allowed the data to be considered in new and different ways. The second step in the analysis involved sorting the codes into themes. A theme is an expression of the latent content of the text. For each theme, its content was expressed in two categories. To ensure the trustworthiness of the analysis, the authors discussed the classification of codes, categories, and themes until consensus was reached.

Field Code Changed

### Ethical Issues

The Institutional Review Board of the University Hospitals Leuven, Belgium, evaluated and approved the study protocol. This study was performed with ethical standards as described in the latest Declaration of Helsinki.

### DISCUSSION

Previous studies have shown that the implementation of a comprehensive transition programme can have positive effects on several patient outcomes. We developed a transition programme for young people with JIA as a brief intervention. Implementation of these transition programmes in clinical practice may be more feasible, because we estimated that one full-time equivalent of manpower of the entire team could take on a case load of 250 to 300 transitioning patients within this transition programme. In the present article, we

23

1  
2  
3  
4  
5  
6  
7 describe the rationale and the design of a mixed-methods approach for evaluating the clinical impact of the  
8 transition programme for [adolescents young people](#) with JIA, [and provide baseline data](#).

9  
10 Our study is innovative in four aspects. First, to the best of our knowledge, this is the first evaluation of  
11 a transition programme structured as a brief intervention. Brief interventions are usually conducted in a one-  
12 on-one situation and take shorter periods of time [452]. Brief interventions are predominantly used in the  
13 prevention and treatment of substance abuse [463], although they have been employed in other settings as  
14 well [474,485]. Shorter time-consuming interventions are in demand, since the current trend is to implement  
15 transition programmes through optimal time use and cost-efficacy. [However, as pointed out by McDonagh and](#)  
16 [colleagues, training of healthcare professionals will require additional resources \[49\]](#).

17  
18  
19  
20  
21  
22  
23 Second, we designed this brief intervention as a complex intervention and used the MRC framework to  
24 perform our evaluation. It is argued that even simple interventions can be complex undertakings, mixing  
25 elements of content, intensity, duration, and setting [452]. Therefore, clearly specifying the steps and  
26 components of a brief intervention is needed. For this purpose, we used the criteria for the development and  
27 evaluation of complex interventions (CReDECI) in health care [19].

28  
29  
30  
31  
32 Third, within this complex intervention framework, we employed a sequential mixed-methods  
33 approach, more specifically an embedded experimental design. This mixed-methods approach enabled us to  
34 gain better insight into the clinical impact of the key components of this complex intervention. Using this  
35 approach, we integrated the findings of ~~the our~~ different studies.

36  
37  
38  
39  
40  
41  
42  
43  
44  
45  
46  
47  
48  
49  
50  
51  
52  
53  
54  
55  
56  
57  
58  
59  
60  
Mixed-methods studies differ from multi-methods studies in that the latter involve a set of mono-  
method studies that use different designs and that are conducted independently. Although integration is highly  
advocated, it is seldom done. The reason can be explained in two ways [5046]. First, researchers do not always  
make use of the various ways of integrating findings in their reports. They report the results of qualitative and  
quantitative components separately, or they report the qualitative and quantitative findings together without  
considering how they are related to each other. This indicates that researchers may be unaware of some of the  
unique insights available in mixed-methods studies. In our study, we looked for convergence, divergence, and  
discrepancy in the findings of both methods. This process is defined as crystallisation [5046]. Indeed,  
crystallisation of results and exploration of definite discrepancies can lead to further insights. Second, the  
integration of data and findings from different components of a mixed-methods study is not always apparent in

Field Code Changed

1  
2  
3  
4  
5  
6  
7 the articles emerging from them. This indicates that any unique insights available from mixed-methods studies  
8 may not be disseminated in ways that are attributable to mixed-methods studies.  
9

10  
11 Lastly, the results of the quantitative longitudinal and comparative studies, and the qualitative studies  
12 will be separately published, and will provide pilot data on the feasibility and impact of a brief transition  
13 programme on patient- and parent-reported outcomes in young people with JIA. this study provides  
14 pilot data on the feasibility and impact of a brief transition programme for young persons with JIA. The data of  
15 this forthcoming study can be used to design a randomised controlled trial testing the effectiveness of the  
16 programme in a robust way. Indeed, the effect size obtained in the present study can be used for power and  
17 sample size calculations for future studies. Admittedly, since the present study was conducted in persons with  
18 JIA, the data are not necessarily generalisable to other patient populations.  
19  
20

21  
22 Although we use an innovative embedded experimental design in the DON'T RETARD project, some  
23 limitations should be addressed. The assessment of the patient's transition readiness was no key component  
24 of our transition programme. Recently, an increasing number of studies investigated the use of assessment  
25 tools such as the Transition Readiness Assessment Questionnaire (TRAQ) [51], an instrument aiming to  
26 evaluate a set of skills and developmental tasks that should be fulfilled in order to transfer patients to adult  
27 care.  
28  
29

30  
31 Furthermore, our brief transition programme might look more as a transfer than a transition  
32 programme. The concept of a transition programme may imply more transitional care, starting in early  
33 adolescence, whereas this brief intervention starts in the pre-transfer period. Our brief intervention  
34 predominantly focuses on counselling and education, rather than skills training. Still, expecting all education  
35 needs to be met in the relatively short programme described is ambitious. Moreover, regular assessments of  
36 education needs should already be initiated in paediatric care.  
37  
38

39  
40 In addition Furthermore, we have to bear in mind that the list of outcomes we used to assess the  
41 clinical impact of our programme is non-exhaustive. Additional outcomes such as self-efficacy or the level of  
42 autonomy of patients might be of interest. Post hoc, we must also admit that evaluating the transition  
43 readiness of young people with JIA, even as their level of autonomy and self-efficacy lacking in our  
44 intervention, however, these are definitely aspects of interest in the context of transition [52].  
45  
46  
47  
48  
49  
50  
51  
52

1  
2  
3  
4  
5  
6  
7 ~~which should be included in future research. Furthermore, since patients who were included in~~  
8 ~~the comparison group were already transferred to adult rheumatology, they were older as compared to the~~  
9 ~~intervention group. In addition, transfer of patients occurred in general somewhat later in the era before our~~  
10 ~~transition programme. This also contributes to the higher age of the comparison subjects. the comparative~~  
11 ~~study included control subjects of a different and older age group than the intervention subjects. Hence, indeed,~~  
12 ~~a matching procedure on age was not possible. we did not match on age, because of the precondition that~~  
13 ~~control subjects~~  
14  
15  
16  
17  
18  
19

## 20 CONCLUSION

21  
22  
23 ~~We~~ ~~This methods paper~~ presented the rationale and design of a study intended to evaluate a  
24 transition programme for ~~adolescents young people~~ with JIA as a brief intervention. Here, we used the ~~Medical~~  
25 ~~Research Council~~ framework. The embedded experimental design ~~offered offers us~~ the opportunity to obtain  
26 an overall picture of the clinical impact of the transition programme on ~~adolescents young people~~ with JIA ~~who~~  
27 ~~participated in it. Furthermore, it~~ also allowed ~~us s~~ to get an overall picture of how these ~~adolescents young~~  
28 ~~people~~ experienced this programme. This study protocol ~~was~~ designed to evaluate our brief intervention. This  
29 evaluation enabled us to get more insight into the active components of our transition programme.  
30 Examination of key clinical and methodological uncertainties in the exploratory trial phase ~~helps could help~~  
31 researchers to set up definite randomised controlled trials and guide long-term implementation.  
32  
33  
34  
35  
36  
37  
38  
39

## 40 TRIAL STATUS

41  
42 The trial started February 1, 2009, and ended on February 1, 2011.  
43  
44  
45

## 46 ABBREVIATIONS

|    |                                                                                             |
|----|---------------------------------------------------------------------------------------------|
| 47 |                                                                                             |
| 48 |                                                                                             |
| 49 | CHAQ-DI      Childhood Health Assessment Questionnaire                                      |
| 50 |                                                                                             |
| 51 | CReDECI      Criteria for Reporting the Development and Evaluation of Complex Interventions |
| 52 |                                                                                             |
| 53 | ICC            Intra-class correlation                                                      |
| 54 |                                                                                             |
| 55 |                                                                                             |
| 56 |                                                                                             |
| 57 |                                                                                             |
| 58 |                                                                                             |
| 59 |                                                                                             |
| 60 |                                                                                             |

1  
2  
3  
4  
5  
6  
7  
8  
9  
10  
11  
12  
13  
14  
15  
16  
17  
18  
19  
20  
21  
22  
23  
24  
25  
26  
27  
28  
29  
30  
31  
32  
33  
34  
35  
36  
37  
38  
39  
40  
41  
42  
43  
44  
45  
46  
47  
48  
49  
50  
51  
52  
53  
54  
55  
56  
57  
58  
59  
60

|         |                                                 |
|---------|-------------------------------------------------|
| ICF     | International Classification of Functioning     |
| JIA     | juvenile idiopathic arthritis                   |
| LAS     | linear analogue scale                           |
| MD      | medical doctor                                  |
| MRC     | Medical Research Council                        |
| MEVI-20 | Multidimensional Fatigue Index                  |
| NA      | not applicable                                  |
| NR      | not reported                                    |
| PAT     | patient                                         |
| PAR     | parent                                          |
| PCS-YSR | Psychological Control Scale – Youth Self Report |
| PedsQL  | Paediatric Quality of Life Inventory            |
| PI      | Promotion Independence Scale                    |
| PKQ     | Patient Knowledge Questionnaire                 |
| PRS-YSR | Parental Regulation Scale                       |
| PVF     | Autonomy Support Scale                          |
| SHCS-AQ | Swiss HIV Cohort Study Adherence Questionnaire  |
| TC      | transition coordinator                          |
| VAS     | visual analogue scale                           |

#### AUTHORS CONTRIBUTIONS

PM, RW, CW, and DH were responsible for the concept and design of the study, and analysis and interpretation of the data. DH and KV collected the data. DH drafted the manuscript. PM, KV, EG, RW, and CW critically revised the manuscript for important intellectual content. All authors read and approved the final manuscript.

**ACKNOWLEDGMENTS**

This study was supported by a scientific grant from the King Baudouin Foundation; Fonds voor Wetenschappelijk Reuma Onderzoek (Fund for Scientific Rheumatism Research); and Clinical Research Fund of the University Hospitals Leuven, Belgium. These funding sources had no involvement in the collection, analysis, and interpretation of data. The authors thank all subjects who took part in and supported this study and this paper: the patients, parents, and rheumatology health care providers of both paediatric and adult rheumatology of the four participating centres/private practices. We also thank the administrative staff of the Department of Rheumatology of Ghent, the administrative staff of the Department of Musculoskeletal Sciences, and the administrative staff of the Department of Paediatric Rheumatology of Leuven.

**COMPETING INTERESTS**

The authors declare that they have no competing interests.

## Reference List

Field Code Changed

- 1 Meleis AI: *Transitions Theory: Middle range and situation-specific theories in nursing research and practice*. New York: Springer Publishing Company; 2010.
- 2 American Academy of Pediatrics, American Academy of Family Physicians, American College of Physicians-American Society of Internal Medicine.: A consensus statement on health care transitions for young adults with special health care needs. *Pediatrics* 2002, **110**:1304-1306.
- 3 American Academy of Pediatrics, American Academy of Family Physicians, American College of Physicians, Transitions Clinical Report Authoring Group, Cooley WC, Sagerman PJ: Supporting the health care transition from adolescence to adulthood in the medical home. *Pediatrics* 2011, **128**:182-200.
- 4 Knauth A, Verstappen A, Reiss J, Webb GD: Transition and transfer from pediatric to adult care of the young adult with complex congenital heart disease. *Cardiol Clin* 2006, **24**:619-29, vi.
- 5 Chaturvedi S, Jones CL, Walker RG, Sawyer SM: The transition of kidney transplant recipients: a work in progress. *Pediatr Nephrol* 2009, **24**:1055-1060.
- 6 Craig SL, Towns S, Bibby H: Moving on from paediatric to adult health care: an initial evaluation of a transition program for young people with cystic fibrosis. *Int J Adolesc Med Health* 2007, **19**:333-343.
- 7 Holmes-Walker DJ, Llewellyn AC, Farrell K: A transition care programme which improves diabetes control and reduces hospital admission rates in young adults with Type 1 diabetes aged 15-25 years. *Diabet Med* 2007, **24**:764-769.
- 8 McDonagh JE, Southwood TR, Shaw KL: The impact of a coordinated transitional care programme on adolescents with juvenile idiopathic arthritis. *Rheumatology (Oxford)* 2007, **46**:161-168.
- 9 Remorino R, Taylor J: Smoothing things over: the transition from pediatric to adult care for kidney transplant recipients. *Prog Transplant* 2006, **16**:303-308.
- 10 Shaw KL, Southwood TR, McDonagh JE: Development and preliminary validation of the 'Mind the Gap' scale to assess satisfaction with transitional health care among adolescents with juvenile idiopathic arthritis. *Child Care Health Dev* 2007, **33**:380-388.
- 11 Steinkamp G, Ullrich G, Muller C, Fabel H, von der HH: Transition of adult patients with cystic fibrosis from paediatric to adult care--the patients' perspective before and after start-up of an adult clinic. *Eur J Med Res* 2001, **6**:85-92.
- 12 Hilderson D, Westhovens R, Wouters C, Moons P: Transitional care for adolescents with rheumatic diseases: urgent need for more research. *Child Care Health Dev* 2008, **34**:401-402.
- 13 Betz CL: Transition of adolescents with special health care needs: review and analysis of the literature. *Issues Compr Pediatr Nurs* 2004, **27**:179-241.



- 1  
2  
3  
4  
5  
6  
7  
8  
9  
10  
11  
12  
13  
14  
15  
16  
17  
18  
19  
20  
21  
22  
23  
24  
25  
26  
27  
28  
29  
30  
31  
32  
33  
34  
35  
36  
37  
38  
39  
40  
41  
42  
43  
44  
45  
46  
47  
48  
49  
50  
51  
52  
53  
54  
55  
56  
57  
58  
59  
60
- 14 Hilderson D, Moons P, Westhovens R, Wouters C: Attitudes of rheumatology practitioners toward transition and transfer from pediatric to adult healthcare. *Rheumatol Int* 2012, **32**:3887-3896.
- 15 Craig P, Dieppe P, Macintyre S, Michie S, Nazareth I, Petticrew M: Developing and evaluating complex interventions: the new Medical Research Council guidance. *BMJ* 2008, **337**:a1655.
- 16 Campbell M, Fitzpatrick R, Haines A, Kinmonth AL, Sandercock P, Spiegelhalter D, Tyrer P: Framework for design and evaluation of complex interventions to improve health. *BMJ* 2000, **321**:694-696.
- 17 Hilderson D, Corstjens F, Moons P, Wouters C, Westhovens R: Adolescents with juvenile idiopathic arthritis: who cares after the age of 16? *Clin Exp Rheumatol* 2010, **28**:790-797.
- 18 Chaudhry SR, Keaton M, Nasr SZ: Evaluation of a cystic fibrosis transition program from pediatric to adult care. *Pediatr Pulmonol* 2013, **48**: 658-65.
- 19 Mohler R, Bartoszek G, Kopke S, Meyer G: Proposed criteria for reporting the development and evaluation of complex interventions in healthcare (CRDeCI): guideline development. *Int J Nurs Stud* 2012, **49**:40-46.
- 20 Creswell JW, Plano Clark VL: *Designing and conducting mixed methods research*. Thousand Oaks, California: Sage Publications; 2007.
- 21 Eyckmans L, Hilderson D, Westhovens R, Wouters C, Moons P: What does it mean to grow up with juvenile idiopathic arthritis? A qualitative study on the perspectives of patients. *Clin Rheumatol* 2011, **30**:459-465.
- 22 Hilderson D, Eyckmans L, Van der Elst K, Westhovens R, Wouters C, Moons P: Transfer from paediatric rheumatology to the adult rheumatology setting: experiences and expectations of young adults with juvenile idiopathic arthritis. *Clin Rheumatol* 2013, **32**: 575-83.
- 23 Ullrich G, Mattussek S, Dressler F, Thon A: How do adolescents with juvenile chronic arthritis consider their disease related knowledge, their unmet service needs, and the attractiveness of various services? *Eur J Med Res* 2002, 7:8-18.
- 24 Varni JW, Burwinkle TM, Seid M, Skarr D: The PedsQL 4.0 as a pediatric population health measure: feasibility, reliability, and validity. *Ambul Pediatr* 2003, 3:329-41.
- 25 Varni JW, Seid M, Kurtin PS: PedsQL 4.0: reliability and validity of the Pediatric Quality of Life Inventory version 4.0 generic core scales in healthy and patient populations. *Med Care* 2001, 39:800-12.
- 26 Varni JW, Seid M, Smith KT, Burwinkle T, Brown J, Szer IS: The PedsQL in pediatric rheumatology: reliability, validity, and responsiveness of the Pediatric Quality of Life Inventory Generic Core Scales and Rheumatology Module. *Arthritis Rheum* 2002, **46**:714-725.
- ~~24 Varni JW, Seid M, Knight TS, Uzark K, Szer IS: The PedsQL 4.0 Generic Core Scales: sensitivity, responsiveness, and impact on clinical decision-making. *J Behav Med* 2002, 25:175-193.~~
- 27 Deschamps AE, De GS, Vandamme AM, Bobbaers H, Peetermans WE, Van WE: Diagnostic value of different adherence measures using electronic monitoring and virologic failure as reference standards. *AIDS Patient Care STDS* 2008, **22**:735-743.

Formatted: Not Highlight

Formatted: Indent: Left: 0", Hanging: 0.25"

Formatted: Not Highlight

Formatted: Not Highlight

Formatted: Font: Bold

1  
2  
3  
4  
5  
6  
7  
8  
9  
10  
11  
12  
13  
14  
15  
16  
17  
18  
19  
20  
21  
22  
23  
24  
25  
26  
27  
28  
29  
30  
31  
32  
33  
34  
35  
36  
37  
38  
39  
40  
41  
42  
43  
44  
45  
46  
47  
48  
49  
50  
51  
52  
53  
54  
55  
56  
57  
58  
59  
60

- 286 Hilderson D, Moons P, Wouters C, Westhovens R: Adolescents with juvenile idiopathic arthritis: what do they know about their condition? [abstract]. *Annals of the Rheumatic Diseases* 2011, **70**:756
- 297 Moons P, Van Deyk K, De Bleser L, Marquet K, Raes E, De Geest S, Budts W: Quality of life and health status in adults with congenital heart disease: a direct comparison with healthy counterparts. *Eur J Cardiovasc Prev Rehabil* 2006, **13**:407-413.
- 3028 Lin JM, Brimmer DJ, Maloney EM, Nyarko E, Belue R, Reeves WC: Further validation of the Multidimensional Fatigue Inventory in a US adult population sample. *Popul Health Metr* 2009, **7**:18.
- 3129 Soenens B, Vansteenkiste M, Lens W, Luyckx K, Goossens L, Beyers W, Ryan RM: Conceptualizing parental autonomy support: adolescent perceptions of promotion of independence versus promotion of volitional functioning. *Dev Psychol* 2007, **43**:633-646.
- 320 Kins E, Beyers W, Soenens B, Vansteenkiste M: Patterns of home leaving and subjective well-being in emerging adulthood: the role of motivational processes and parental autonomy support. *Dev Psychol* 2009, **45**:1416-1429.
- 334 Soenens B, Vansteenkiste M, Luyckx K, Goossens L: Parenting and adolescent problem behavior: an integrated model with adolescent self-disclosure and perceived parental knowledge as intervening variables. *Dev Psychol* 2006, **42**:305-318.
- 342 Eddy L, Cruz M: The relationship between fatigue and quality of life in children with chronic health problems: a systematic review. *J Spec Pediatr Nurs* 2007, **12**:105-114.
- 353 Russo E, Trevisi E, Zulian F, Battaglia MA, Viel D, Facchin D, Chiusso A, Martinuzzi A: Psychological profile in children and adolescents with severe course Juvenile Idiopathic Arthritis. *ScientificWorldJournal* 2012, **2012**:841375.
- ~~34 Ullrich G, Mattussek S, Dressler F, Thon A: How do adolescents with juvenile chronic arthritis consider their disease related knowledge, their unmet service needs, and the attractiveness of various services? *Eur J Med Res* 2002, **7**:8-18.~~
- 36 Wallace CA, Ruperto N, Giannini E; Childhood Arthritis and Rheumatology Research Alliance; Pediatric Rheumatology International Trials Organization; Pediatric Rheumatology Collaborative Study Group: Preliminary criteria for clinical remission for select categories of juvenile idiopathic arthritis. *J Rheumatol* 2004, **31**:2290-4.
- 376 Ouwerkerk JW, van Pelt PA, Takken T, Helders PJ, Net J: Evaluating score distributions in the revised Dutch version of the Childhood Health Assessment Questionnaire. *Pediatr Rheumatol Online J* 2008, **6**:14.
- 387 Singh G, Athreya BH, Fries JF, Goldsmith DP: Measurement of health status in children with juvenile rheumatoid arthritis. *Arthritis Rheum* 1994, **37**:1761-1769.
- 39 Takken T, van den Eijkhof F, Hoijtink H, Helders PJ, van der Net J: Examining the psychometric characteristics of the Dutch childhood health assessment questionnaire: room for improvement? *Rheumatol Int* 2006, **26**:979-83.

Formatted: Indent: Left: 0", Hanging: 0.38"

Formatted: Not Highlight

Formatted: Not Highlight

Formatted: Not Highlight

- 1  
2  
3  
4  
5  
6  
7 | ~~3840~~ Cohen J: A power primer. Psychol Bull 1992, **112**:155-159.
- 8 | ~~3941~~ Berben L, Sereika SM, Engberg S: Effect size estimation: methods and examples. Int J Nurs Stud 2012, **49**:1039-1047.
- 9  
10  
11 | ~~420~~ Cohen J: *Statistical power analysis for the behavioral sciences*. Lawrence Erlbaum Associates; 1988.
- 12  
13 | ~~434~~ Polit DF, Beck CT: **Nursing Research: principles and methods**. In *Nursing Research: Principle and Methods*. 7 edition. Philadelphia: Lippincott Williams & Wilkins; 2004.
- 14  
15 | ~~442~~ Graneheim UH, Lundman B: Qualitative content analysis in nursing research: concepts, procedures and measures to achieve trustworthiness. Nurse Educ Today 2004, **24**:105-112.
- 16  
17 | ~~453~~ Babor TF: Avoiding the horrid and beastly sin of drunkenness: does dissuasion make a difference? J Consult Clin Psychol 1994, **62**:1127-1140.
- 18  
19  
20 | ~~464~~ Humeniuk R, Ali R, Babor T, Souza-Formigoni ML, de Lacerda RB, Ling W, McRee B, Newcombe D, Pal H, Poznyak V et al.: A randomized controlled trial of a brief intervention for illicit drugs linked to the Alcohol, Smoking and Substance Involvement Screening Test (ASSIST) in clients recruited from primary health-care settings in four countries. Addiction 2012, **107**:957-966.
- 21  
22 | ~~475~~ Fachini A, Aliane PP, Martinez EZ, Furtado EF: Efficacy of brief alcohol screening intervention for college students (BASICS): a meta-analysis of randomized controlled trials. Subst Abuse Treat Prev Policy 2012, **7**:40.
- 23  
24  
25  
26 | ~~486~~ Laure P, Mangin G: Advising parents on physical activity for children between 0 and 5 years. J Sports Med Phys Fitness 2011, **51**:467-472.
- 27  
28  
29  
30  
31  
32  
33 | ~~49~~ McDonagh JE, Southwood TR, Shaw KL; Bristish Paediatric Rheumatology Group: Unmet education and training needs of rheumatology health professionals in adolescent health and transitional care. Rheumatology (Oxford) 2004, **43**(6):737-43.
- 34  
35  
36 | ~~5048~~ O'Cathain A, Murphy E, Nicholl J: Integration and publications as indicators of 'yield' from mixed methods studies. *Journal of Mixed Methods Research* 2007, **1**:147-163.
- 37  
38  
39  
40 | ~~51~~ Sawicki GS, Lukens-Bull K, Yin X, Demars N, Huang IC, Livingood W, Reiss J, Wood D: Measuring the transition readiness of youth with special healthcare needs: validation of the TRAQ--TransitionReadiness Assessment Questionnaire. J Pediatr Psychol 2011 Mar, **36**:160-71.
- 41  
42  
43 | ~~52~~ van Staa A, van der Stege HA, Jedeloo S, Moll HA, Hilberink SR: Readiness to transfer to adult care of adolescents with chronic conditions: exploration of associated factors. J Adolesc Health 2011, **48**:295-302.

Formatted: Not Highlight

Formatted: Not Highlight

Formatted: English (U.S.)

Formatted: Not Highlight

1  
2  
3  
4  
5  
6  
7  
8  
9  
10  
11  
12  
13  
14  
15  
16  
17  
18  
19  
20  
21  
22  
23  
24  
25  
26  
27  
28  
29  
30  
31  
32  
33  
34  
35  
36  
37  
38  
39  
40  
41  
42  
43  
44  
45  
46  
47  
48  
49  
50  
51  
52  
53  
54  
55  
56  
57  
58  
59  
60

Figure 1. Development of a complex intervention based on the MRC framework and its evaluation using an embedded experimental design.



Legend: RCT, randomised controlled trial; QL, qualitative study; QN, quantitative study

.....  
.....  
.....

210x297mm (300 x 300 DPI)

Figure 2. Flow chart illustrating the quantitative and qualitative studies used to assess the transition programme for adolescents with JIA. In Study 1, quantitative analyses were conducted based on a one-group pretest-posttest design with a non-equivalent posttest-only comparison group composed of adolescent-parent dyads. This was followed by Study 2, a qualitative study consisting of in-depth interviews.



210x297mm (300 x 300 DPI)
